# Supplementary material for: An integrated approach for structural characterization of Gui Ling Ji by traveling wave ion mobility mass spectrometry and molecular network
Source: PubMed Central journal article supplement — RSC Adv. 2021 Apr 27;11(26):15546–56. doi: 10.1039/d1ra01834e (PMC9029087; doi:10.1039/d1ra01834e), 2021-04-27
Supplement: RA-011-D1RA01834E-s001.pdf [file RA-011-D1RA01834E-s001.pdf]

## Supporting Information

### **An integrated approach for structural characterization of Gui Ling Ji by traveling wave ion mobility mass spectrometry and molecular network**

Yuhao Zhang <sup>a ‡</sup>, Huibo Lei <sup>b ‡</sup>, Jianfei Tao <sup>bc</sup>, Wenlin Yuan <sup>b</sup>, Weidong Zhang <sup>ab\*</sup>, Ji Ye <sup>b\*</sup>

#### **Affiliation**

<sup>a</sup> *Institute of Interdisciplinary Integrative Medicine Research, Shanghai University of Traditional Chinese Medicine, Shanghai, 201203, China.*

<sup>b</sup> *College of Pharmacy, The Second Military Medical University, Shanghai 200433, China.*

<sup>c</sup> *Pharmacy Department, Shanghai Yang Si Hospital, Shanghai, 200126, China*

## Initial annotation of known components

### Characterization of flavonoids

Flavonoids, a class of natural products widely existed in plants, often present in free form or in combination with side chains to yield flavonoid derivations. Some herbal medicines of PC, EB, GU and EC in GLJ were rich in flavonoids. Flavonoid derivatives with sugar chains often exhibit high abundance ion response in negative ion mode and could result in the neutral losses of 162.0528 Da (glucose), 146.0579 Da (rhamnose), and 132.0423 Da (xylose) in MS/MS spectra. Non-glycoside flavonoids have exhibited good responses in both of positive and negative ion modes. Their typical fragment ions concerning the neutral losses of 27.9949 Da (CO), 43.9898 Da (CO<sub>2</sub>), 18.0106 Da (H<sub>2</sub>O) and 15.0235 Da (CH<sub>3</sub>) in positive ion mode were selected for structural characterization. Besides, the C ring of flavonoids is also prone to experience Retro-Diels-Alder (RDA) fragmentation to form characteristic fragment ions at *m/z* 149.0239, 137.0233, 121.0284 and 119.0491. Due to these characteristic fragment ions, glycoside and non-glycoside flavonoids were gathered and classified clearly by molecular network based on the MS/MS spectra of GLJ and its each single herbal medicine. Targeted compounds identification for glycoside and non-glycoside flavonoids in **Fig. S5A** was used as examples. By observing the composition of different colors in each node, it is deduced that each flavonoid might be originated from various source of medicinal plants. The nodes in **Fig. S5A** are commonly seen flavonoids in natural plants, thus, almost all the corresponding compounds can be easily matched by the UNIFI software and online GNPS database.

According to the online GNPS database, peak 34, 43, 45, 53, 55, 63, 67, 83, 90 and 121 were initially identified as daidzoid quercetin-3-*O*-arabinoglucoside, rutin, hyperoside, kaempferitrin, isoquercitrin, astragalin, quercetin-3-*O*-glucose-6''-acetate, kaempferin,  $\alpha$ -rhamnoisorobin-3-*O*-(3-*O*-acetyl- $\alpha$ -L-rhamnopyranoside), rhamnazin-3-*O*- $\beta$ -D-glucoside, respectively. The cosine scores were greater than 0.8, indicating the results are reliable. The structural identification of peak 83 was taken (#431) as an example. It showed a [M-H]<sup>-</sup> ion at *m/z* 431.0966, estimated molecular formula C<sub>21</sub>H<sub>20</sub>O<sub>10</sub> with mass error of -2.78 ppm. As is shown in **Fig. S5B**, the fragment ion at *m/z* 285.0392 corresponded to the neutral loss of rhamnose, following by successively losses of CH<sub>2</sub>O, CO, Oxygen and CO to produce fragment ions at *m/z* 255.0291, 227.0340, 211.0390, and 183.0453, respectively. The fragmentation behavior is therefore all consistent with that of kaempferin (**Fig. S5C**), and thus peak 83 was finally confirmed. Finally, 11 flavonoid glycosides were identified in **Fig. S5A**, including 10 flavonols and 1 isoflavone.

Five clusters related to flavonoids were summarized in molecular network by the MS/MS spectra of GLJ and herbal medicine of PC, EB, GU and EC. After searching the UNIFI database and the online databases, a total of 75

flavonoids were tentatively identified in GLJ (**Table S1**), including 35 flavonoid glycosides and 40 non-glycoside flavonoids. Of these, 18 flavonoids were unambiguously confirmed by comparing their accurate mass measurements of MS<sup>2</sup> spectra and retention times with reference compounds. Discussion on isomers and potential new compounds in flavonoid network were described in detail in corresponding sections below.

### Characterization of lyso-GPCs

Lyso-GPCs are a class of endogenous constituents derived from animals, containing glycerophosphocholine skeleton and a free glycerol hydroxyl group at *sn*-1 or *sn*-2. Due to the presence of the glycerophosphocholine skeleton, the fragmentation behavior of this class of constituents is also typical and representative. In positive ion mode, lyso-GPCs are likely to generate the base peak at  $m/z$  184.0733[(P-Ch)]<sup>+</sup> and diagnostic fragment ions at  $m/z$  166.0610[(P-Ch)-H<sub>2</sub>O]<sup>+</sup>, 104.1091[(P-Ch)-HPO<sub>3</sub>]<sup>+</sup> and 86.0979[(P-Ch)-HPO<sub>3</sub>-H<sub>2</sub>O]<sup>+</sup>. The MS/MS spectra in positive ion mode of GLJ, and its each single animal-orient medicines of HK, CN, MP were grouped to generate molecular network for the assignment of the lyso-GPCs compounds. Owing to the difference functional group substituted at *sn*1 or *sn*2 sites, typical fragment ions of lyso-GPCs were varied in negative ion mode, which could be useful for distinguishing their structures.

**Fig. S6** shows the molecular network of lyso-GPCs, MS/MS spectra and possible fragmentation patterns of node #482 and #496. In high-energy channel, characteristic daughter ions at  $m/z$  184.0733, 166.0610, 104.1091 and 86.0979 in positive ion mode were observed, which were generated from the unstable long-chain fatty acids in lyso-GPCs. However, previous reports demonstrated that lyso-GPCs would produce precursor ions [M+HCOO]<sup>-</sup> and [M-CH<sub>3</sub>]<sup>-</sup> at low-energy channel in negative ion mode, following by a typical neutral loss of 60.0211 Da (CH<sub>3</sub>COOH). Thus, the MS/MS spectra of lyso-GPCs in negative ion mode was collected for differentiating functional group substituted at *sn*1 or *sn*2 sites. Lysophosphatidylcholines (lysoPCs) and lysoplatelet activating factors (lyso-PAFs), two representative Lyso-GPCs, have exhibited the structural differences on long-chain fatty acyl groups and long-chain fatty ether at *sn*-1 or *sn*-2 position. They can also produce different characteristic fragment ions or neutral losses. For example, peak 232 (C<sub>24</sub>H<sub>50</sub>NO<sub>7</sub>P, [M+H]<sup>+</sup>,  $m/z$  496.3314, mass error of 0.81ppm ) exhibited high abundance product ion at  $m/z$  255.2324[(M-CH<sub>3</sub>)-C<sub>7</sub>H<sub>6</sub>NO<sub>5</sub>P]<sup>-</sup>, which is typical for lysoPCs (a neutral loss of 225.0750 Da, **Fig. S6**). Moreover, several main product ions at  $m/z$  224.0682 [M-H-C<sub>17</sub>H<sub>33</sub>O<sub>2</sub>]<sup>-</sup>, 168.0438 [P-Ch-CH<sub>3</sub>]<sup>-</sup> and 78.9572 [PO<sub>3</sub>]<sup>-</sup> showed the presence of phosphatidylcholine group (polar headgroups esterified to the *sn*-3 position). Thus, peak 232 was identified as 1-hexadecanoyl-*sn*-glycerol-3-phosphocholine from a search of literature. Similarly, peak 216, 222, 227, 231, 238, 243 and 250 were categorized as lysoPCs and identified by previous publications. In contrary, peak 236 (#482) have displayed the different fragmentation behaviors. It has

shown molecular formula of  $C_{24}H_{52}NO_6P$  ( $[M+H]^+$ ) with mass error of -1.45 ppm. A series of product ions at  $m/z$  466.3290  $[M-CH_3]^-$ , 377.2469  $[M-CH_3-C_4H_9N-H_2O]^-$ , 168.0414  $[P-Ch-CH_3]^-$  and 78.9582  $[PO_3]^-$  have been detected, suggesting that this compound belongs to lyso-PAFs. Thus, we definitively assigned it as 1-O-hexadecyl-sn-glycerol-3-phosphocholine. Eventually, by matching with the GNPS database, summarizing the fragmentation rules and consulting the literature, a total of 15 lyso-GPCs were summarized from **Fig. S6**, including 12 lysoPCs and 3 lyso-PAFs.

### Characterization of others

The other 68 compounds were tentatively identified from GLJ (as shown in Tab. S1). Stachyose (1), glucose (4), D (+)-sucrose (5), betaine (6), D (-)-fructose(7), adenosine (9), maltol-3-O- $\beta$ -glucoside (11), 5-hydroxymethylfurfural (12), mesaconine (15), songorine (20), chlorogenic acid (21), fuziline (26), neoline (28), (25S)-inokosterone (58), benzoylmesaconine (77), benzoylaconine (92), benzoylhypacoitine (106), benzoyldeoxyaconine (113), psoralen (132), isopsoralen (139), psoralidin (221), (-)-asarinin (224), bakuchiol (251) and ursolic acid (252) were unambiguously identified and further confirmed by comparison their accurate mass measurements of  $MS^2$  spectra and retention times with reference standards. The other 53 compounds were all presumed by matching MS/MS fragment ions with previously reported literatures.

### Distinction by diagnostic product ions

It has been estimated that chalcone and flavanone types of flavonoids often existed as isomers in natural plants due to the opened or closed states of C-ring. Compared with flavanone, chalcone could yield much higher abundance of characteristic ions at  $m/z$  147.0437 and 119.0491, and these ions can be used as the diagnostic fragment ions. Take the structural characterization procedure of isomers of #323 as an example. By extracting ion chromatography from the original MS data, the same quasi-molecular ions at  $m/z$  323.1284 ( $C_{20}H_{18}O_4$ ,  $[M+H]^+$ ) have been displayed in three corresponding chromatographic peaks with different retention times at 35.68min (peak 206), 39.17min (peak 219) and 46.85min (peak 242), respectively. As shown in **Fig. S7**, For isopentenyl flavonoids, in order to form a stable benzyl moiety, isopentenyl cleavage was happened, yielding to the presence of high-abundance diagnostic fragment ion at  $m/z$  267.0650  $[M+H-C_4H_7]^+$ . Fragment ions at  $m/z$  255.0657 and 239.0702 were corresponded to the successive losses of  $C_5H_9$  moiety and water, with error within 2.48 ppm. After searching

the database in UNIFI platform and analyzing its MS/MS fragment ions, peak 206 was consistent with the fragmentation behavior presented by neobavaisoflavone, and was further confirmed by the standard substance. The other two compounds have showed common product ions at  $m/z$  203.0700, 175.0401 and 147.0439. Peak 242 had a much higher abundance at  $m/z$  203.0705 than that of compound 219 (Fig. S7C), indicating the RDA cleavage of flavonoid was more likely to be produced to form a stable conjugate structure of this compound. The diagnostic product ion at  $m/z$  175.0401, which was corresponded to the loss of  $C_9H_7O_2$ , was resulted from the unstable breakage of chalcone. Compared with peak 242, peak 219 has showed much more abundant of this diagnostic fragment ion (Fig. S7C), suggesting that it belonged to chalcone. Since peak 219 and 242 were a pair of typical flavanone and chalcone isomers, they were tentatively assigned as bavachromene and chromenoflavanone, respectively, and were further confirmed by publication.

## Figure Caption

**Fig. S1** MS/MS spectra of glycyrrhizic acid and its proposed fragmentation behavior.

**Fig. S2** Construction of the molecular network of flavonoids from GLJ and EP for interpreting the novel compound in GLJ (A), MS/MS spectra and possible fragmentation patterns of #513 (peak 199) and #657 (peak 202) from EP (B).

**Fig. S3** Extracted ion chromatography of  $m/z$  845.4905  $[M+HCOO]^-$  and the MS/MS spectra of three peaks at 22.54 min (peak 88), 26.82 min (peak 129) and 26.93min (peak 131).

**Fig. S4** Characterization of isomers with node at #793: (A) EIC of  $m/z$  793.4358  $[M-H]^-$  at 30.91 min (peak 65) and 35.87 min (peak 87), (B) MS/MS spectra of peak 65 and peak 87, (C) overlapping mobility profiles of peak 179 (blue trace) and peak 207 (orange trace), (D) predicted CCS value of chikusetsusaponin IVa and zingibroside R1 by CCSbase platform.

**Fig. S5** The molecular network of flavonoids from GLJ, PC, EC, GU, EB(A), MS/MS spectra of #431 (peak 83) (B), possible fragmentation patterns of kaempferin(C).

**Fig. S6** The molecular network of lyso-GPCs from GLJ, HK, CN, MP and CE, MS/MS spectra and possible fragmentation patterns of node #482 (peak 236) and #496 (peak 232) in negative ion mode.

**Fig. S7** Characterization of isomers with #323: (A) molecular network in which #323 is located (B) extracted ion chromatography (EIC) of  $m/z$  323.1278  $[M+H]^+$ , including three peaks at 35.68 min (peak 206), 39.17 min (peak 219) and 46.85 min (peak 242), (C) MS/MS spectra of three peaks and Diagnostic ion formation pathways of neobavaisoflavone, bavachromene and chromenoflavanone.

Fig. S1

MS/MS of  $m/z$  821.3948

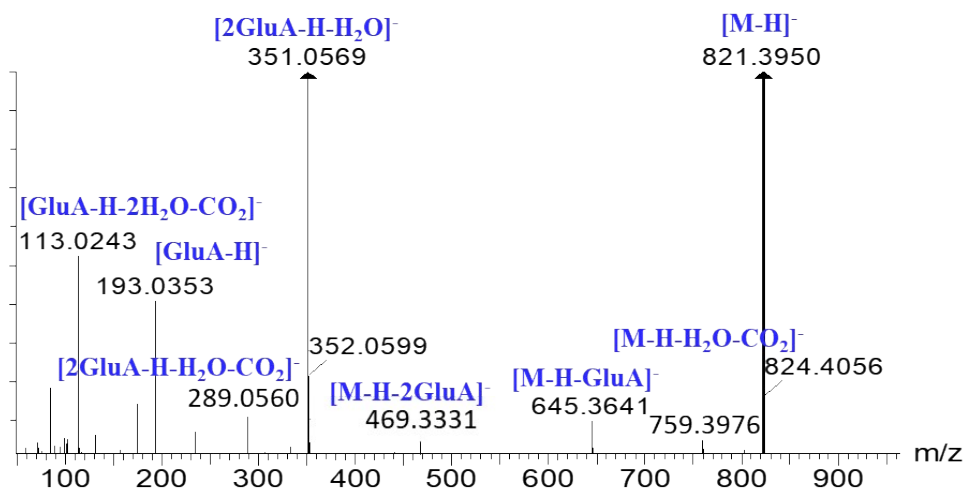

glycyrrhizic acid

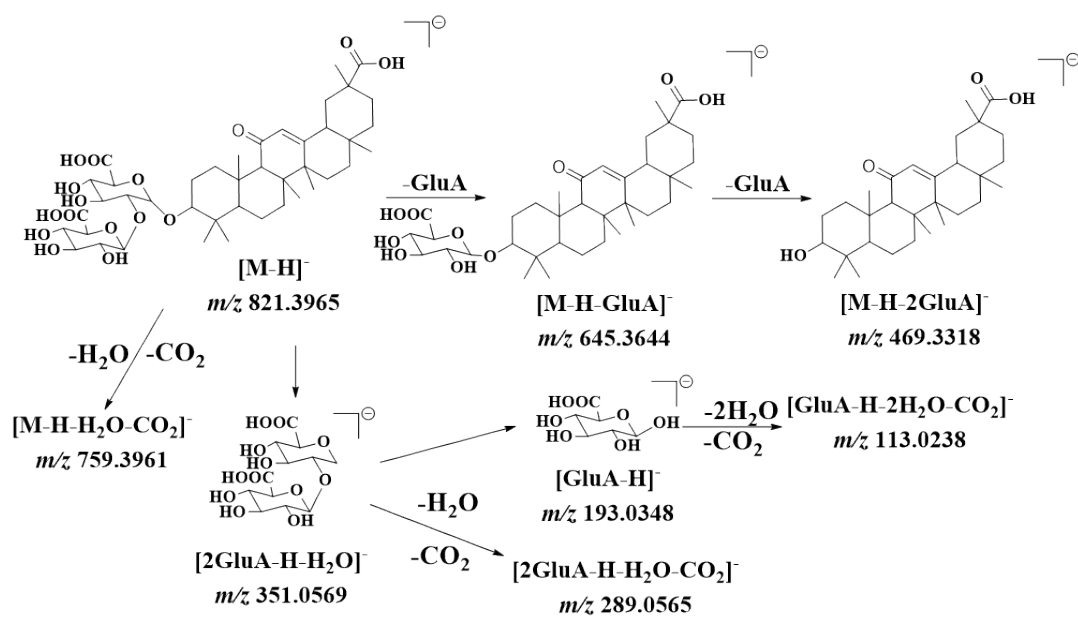

Fig. S2

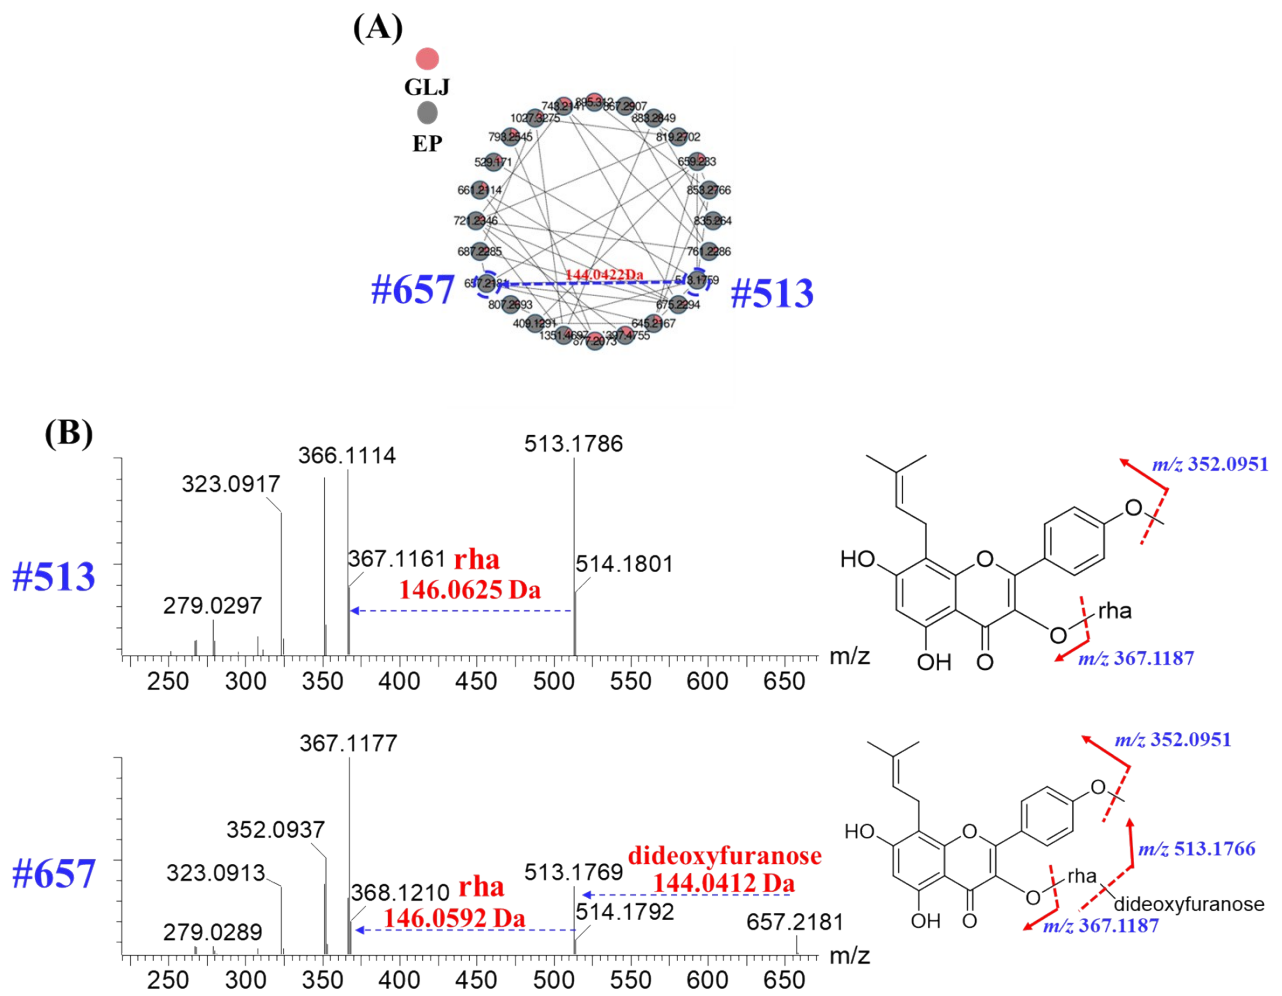



Fig. S3

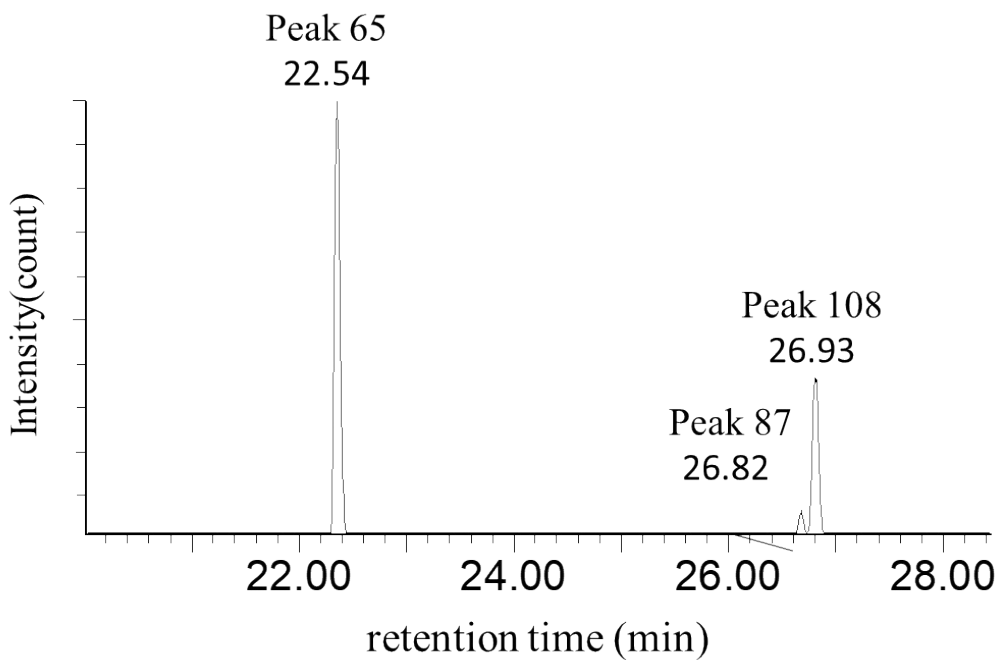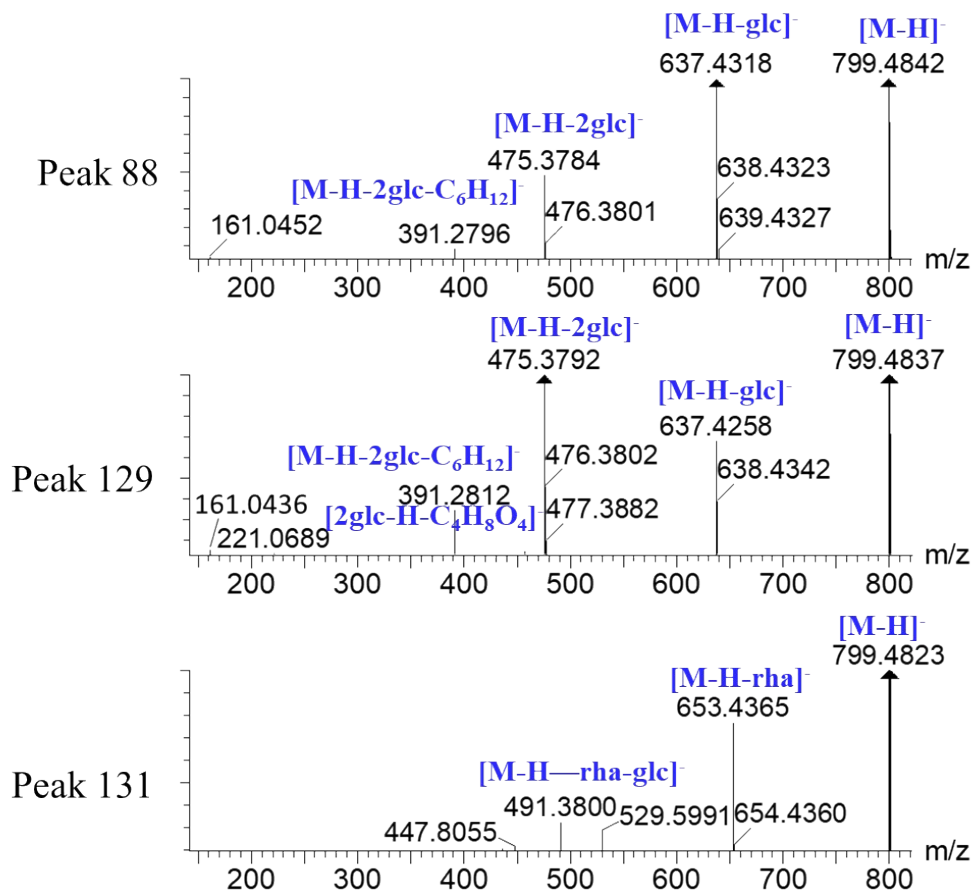

**Fig. S4**

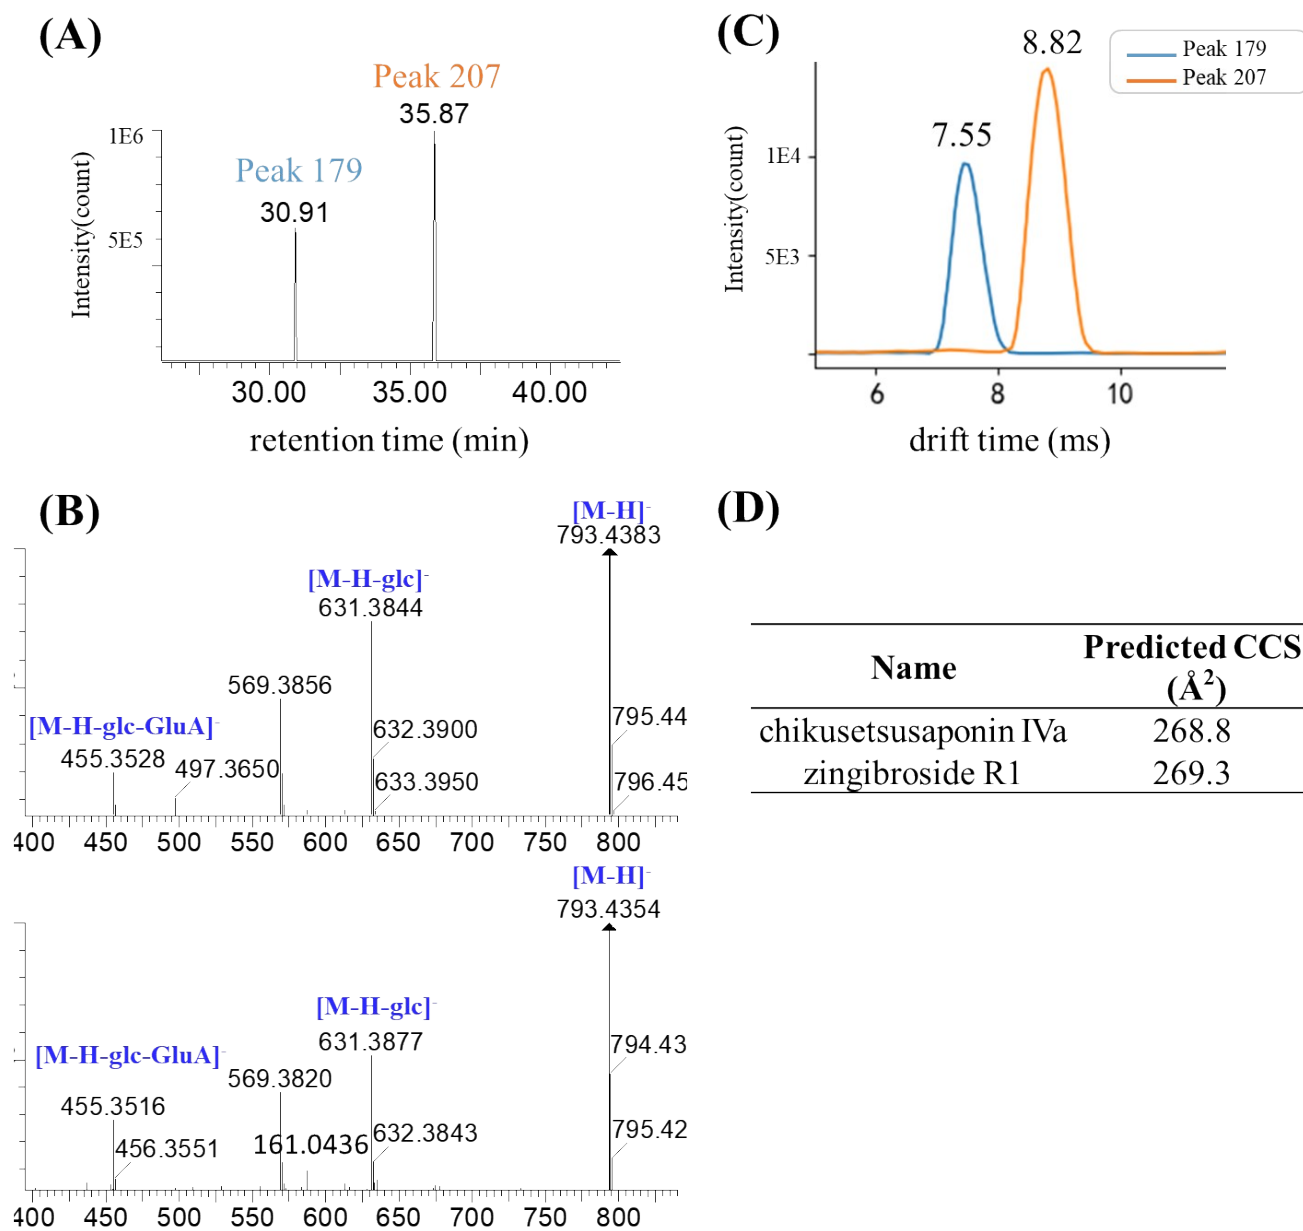

Fig. S5

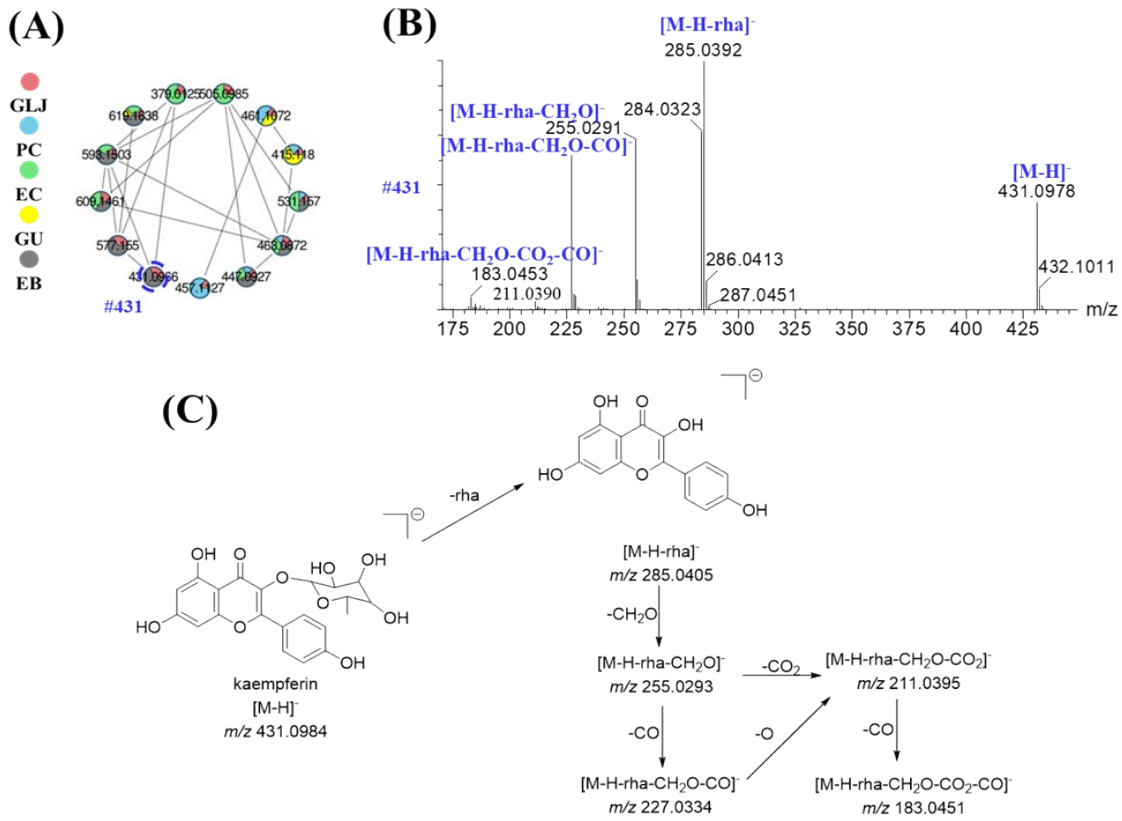

Fig. S6

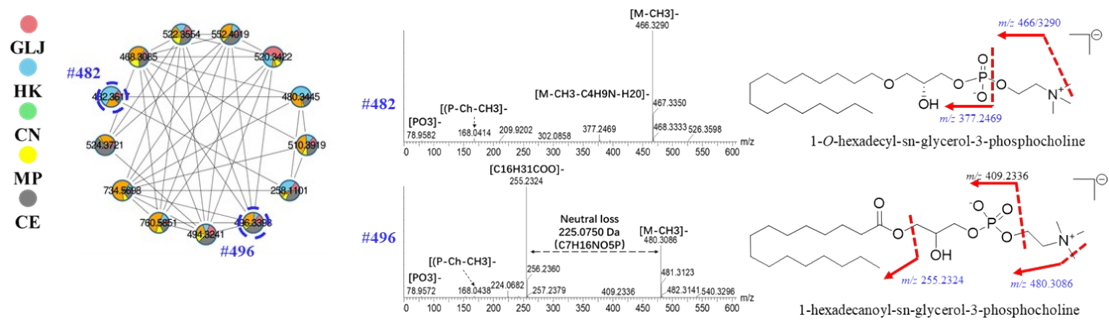

Fig. S7

(A)

- GLJ
- PC
- EC
- GU
- EB

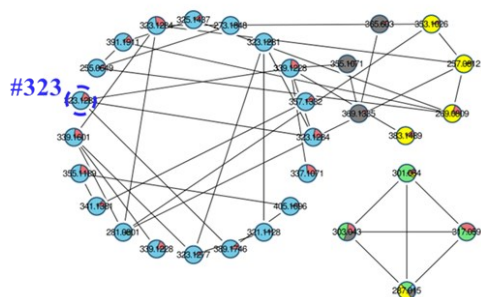

(B)

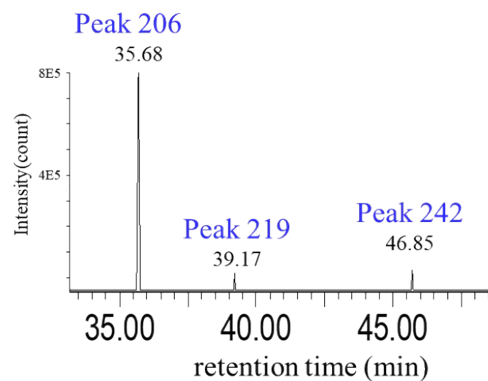

(C)

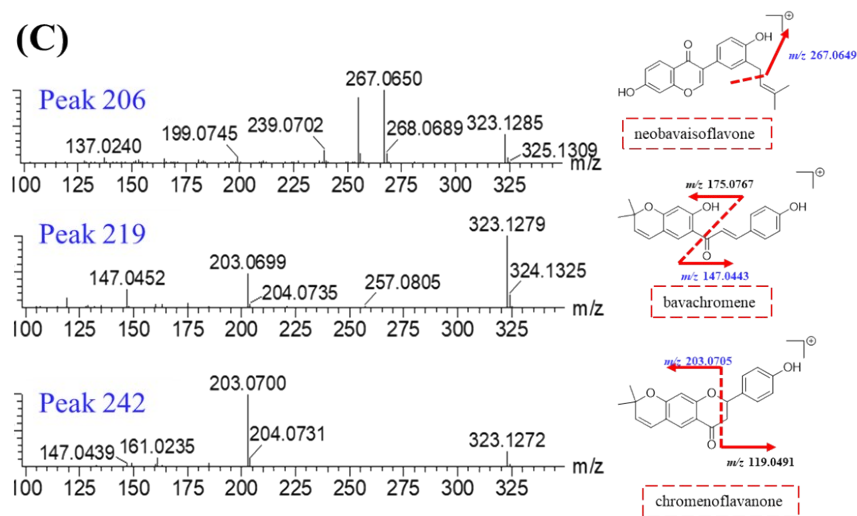

**Table. S1 Characterization of 257 constituents from GLJ by LC-QTOF/MS.**

| PEAK<br>(NO) | RT<br>(min) | Formalu                                                       | Adduct | Observed<br>( <i>m/z</i> ) | Mass<br>error<br>(ppm) | Fragment                                                                                                                                                                              | Identification    | origin         | type   |
|--------------|-------------|---------------------------------------------------------------|--------|----------------------------|------------------------|---------------------------------------------------------------------------------------------------------------------------------------------------------------------------------------|-------------------|----------------|--------|
| 1            | 1.070       | C <sub>24</sub> H <sub>42</sub> O <sub>21</sub>               | +Cl    | 701.1899                   | -2.00                  | [M-H]665.2140<br>[M-H-glc]485.1478<br>[M-C <sub>10</sub> H <sub>19</sub> O <sub>9</sub> ]383.1190<br>[M-2glc]341.1109<br>[M-C <sub>16</sub> H <sub>29</sub> O <sub>14</sub> ]221.0653 | stachyose         | LB             | others |
| 2            | 1.077       | C <sub>5</sub> H <sub>13</sub> NO                             | +H     | 104.1074                   | 3.84                   | NF                                                                                                                                                                                    | D-Valinol         | CN             | others |
| 3            | 1.100       | C <sub>5</sub> H <sub>11</sub> NO <sub>2</sub>                | +H     | 118.0864                   | 0.85                   | NF                                                                                                                                                                                    | valine            | AC/HK<br>CN/CN | others |
| 4            | 1.100       | C <sub>6</sub> H <sub>12</sub> O <sub>6</sub>                 | -H     | 179.0565                   | 2.23                   | NF                                                                                                                                                                                    | glucose           | LB             | others |
| 5            | 1.123       | C <sub>12</sub> H <sub>22</sub> O <sub>11</sub>               | +Cl    | 377.0850                   | -1.59                  | [M-H]341.1070<br>[M-H-Fru]179.0563                                                                                                                                                    | D(+)-sucrose      | LB             | others |
| 6            | 1.146       | C <sub>5</sub> H <sub>11</sub> NO <sub>2</sub>                | +H     | 118.0868                   | 4.23                   | NF                                                                                                                                                                                    | betaine*          | AB/LB          | others |
| 7            | 1.272       | C <sub>6</sub> H <sub>12</sub> O <sub>6</sub>                 | -H     | 179.0555                   | -3.35                  | NF                                                                                                                                                                                    | D(-)-fructose     | LB             | others |
| 8            | 1.713       | C <sub>5</sub> H <sub>7</sub> NO <sub>3</sub>                 | +H     | 130.0506                   | 1.54                   | NF                                                                                                                                                                                    | pyroglutamic acid | HK/CN<br>CN    | others |
| 9            | 2.021       | C <sub>10</sub> H <sub>13</sub> N <sub>5</sub> O <sub>4</sub> | +H     | 268.1046                   | 1.86                   | [M+H-rib]136.0618                                                                                                                                                                     | adenosine*        | CS             | others |
| 10           | 2.891       | C <sub>10</sub> H <sub>13</sub> NO <sub>2</sub>               | +H     | 180.1024                   | 2.78                   | [M+H-H <sub>2</sub> O]162.0891<br>[M+H-H <sub>2</sub> O-CH <sub>3</sub> ]147.0700<br>[M+H-2H <sub>2</sub> O]144.0827<br>[M+H-H <sub>2</sub> O-CO]134.0975                             | salsolinol        | ACD            | others |

|    |        |                                                               |    |          |       |                                                                                                                                                                                                                                                                                                                      |                                                           |       |        |
|----|--------|---------------------------------------------------------------|----|----------|-------|----------------------------------------------------------------------------------------------------------------------------------------------------------------------------------------------------------------------------------------------------------------------------------------------------------------------|-----------------------------------------------------------|-------|--------|
| 11 | 3.645  | C <sub>12</sub> H <sub>16</sub> O <sub>8</sub>                | -H | 287.0761 | -3.83 | [M-H-glc]125.0230                                                                                                                                                                                                                                                                                                    | maltol-3- <i>O</i> -β-glucoside*                          | EU    | others |
| 12 | 6.257  | C <sub>6</sub> H <sub>6</sub> O <sub>3</sub>                  | +H | 127.0394 | 3.15  | [M-OH]109.0290<br>[M-CHO]97.0290<br>[M+H-OH-CHO]81.0345                                                                                                                                                                                                                                                              | 5-hydroxymethylfurfural*                                  | AC/EC | others |
| 13 | 6.684  | C <sub>16</sub> H <sub>22</sub> O <sub>10</sub>               | -H | 373.1148 | 2.14  | [M-H-glc]211.0616<br>[M-H-glc-COOH-OH]149.0614<br>[M-H-glc-2COO]123.0451                                                                                                                                                                                                                                             | geniposidic acid                                          | EU    | others |
| 14 | 8.863  | C <sub>16</sub> H <sub>24</sub> O <sub>10</sub>               | -H | 375.1287 | -2.67 | [M-H-glc]213.0769<br>[M-H-glc-COO]169.0892<br>[M-H-glc-COO-H <sub>2</sub> O]151.0757<br>[M-H-glc-C <sub>3</sub> H <sub>4</sub> O <sub>3</sub> ]125.0630<br>[M-H-glc-C <sub>3</sub> H <sub>4</sub> O <sub>3</sub> -H <sub>2</sub> O]107.0480                                                                          | mussaenoside acid<br>adoxosidic acid<br>8-epiloganic acid | CT    | others |
| 15 | 9.302  | C <sub>24</sub> H <sub>39</sub> NO <sub>9</sub>               | +H | 486.2704 | 1.23  | [M+H-H <sub>2</sub> O]468.2531<br>[M+H-CH <sub>3</sub> OH]454.2531<br>[M+H-CH <sub>3</sub> OH-H <sub>2</sub> O]436.2316<br>[M+H-2CH <sub>3</sub> OH]422.2273<br>[M+H-2CH <sub>3</sub> OH-H <sub>2</sub> O]404.2013<br>[M+H-3CH <sub>3</sub> OH-H <sub>2</sub> O]378.1837                                             | mesaconine*                                               | ACD   | others |
| 16 | 9.470  | C <sub>16</sub> H <sub>24</sub> O <sub>10</sub>               | -H | 375.1295 | -0.53 | [M-glc]213.0754<br>[M-glc-COO]169.0905<br>[M-glc-COO-H <sub>2</sub> O]151.0749<br>[M-glc-C <sub>3</sub> H <sub>4</sub> O <sub>3</sub> -H <sub>2</sub> O]107.0488                                                                                                                                                     | mussaenoside acid<br>adoxosidic acid<br>8-epiloganic acid | CT    | others |
| 17 | 9.904  | C <sub>21</sub> H <sub>28</sub> O <sub>13</sub>               | -H | 487.1441 | 3.28  | [M-H-rha-glc]179.0343<br>[M-H-rha-glc-H <sub>2</sub> O]161.0242<br>[M-rha-glc-CO <sub>2</sub> ]135.0431<br>[M-rha-glc-HCOOH]133.0268                                                                                                                                                                                 | cistanoside F                                             | CT    | others |
| 18 | 10.305 | C <sub>28</sub> H <sub>42</sub> N <sub>4</sub> O <sub>6</sub> | +H | 531.3179 | 0.38  | [M-C <sub>12</sub> H <sub>17</sub> N <sub>2</sub> O <sub>3</sub> ]293.1865<br>[M-C <sub>16</sub> H <sub>22</sub> N <sub>3</sub> O <sub>3</sub> ]222.1125<br>[M-C <sub>19</sub> H <sub>34</sub> N <sub>4</sub> O <sub>3</sub> ]165.0546<br>[M-C <sub>21</sub> H <sub>35</sub> N <sub>4</sub> O <sub>4</sub> ]123.0445 | kukoamine A<br>kukoamine B                                | LB    | others |

|    |        |                                                                |    |          |       |                                                                                                                                                                                                                                                                                                                                                         |                                                                              |                |           |
|----|--------|----------------------------------------------------------------|----|----------|-------|---------------------------------------------------------------------------------------------------------------------------------------------------------------------------------------------------------------------------------------------------------------------------------------------------------------------------------------------------------|------------------------------------------------------------------------------|----------------|-----------|
| 19 | 10.965 | C <sub>8</sub> H <sub>20</sub> NO <sub>6</sub> P               | +H | 258.1101 | 1.94  | [P-Ch]184.0738<br>[P-Ch-H <sub>2</sub> O]166.0610<br>[P-Ch-C <sub>3</sub> H <sub>9</sub> N]125.0000<br>[P-Ch-HPO <sub>3</sub> ]104.1091<br>[P-Ch-HPO <sub>3</sub> -H <sub>2</sub> O]86.0979                                                                                                                                                             | <i>sn</i> -glycerol-3-phosphocholine                                         | CE/HK<br>CN/QN | lyso-GPCs |
| 20 | 10.997 | C <sub>22</sub> H <sub>31</sub> NO <sub>3</sub>                | +H | 358.2371 | -1.67 | [M+H-H <sub>2</sub> O]340.2263<br>[M+H-2H <sub>2</sub> O]322.2161                                                                                                                                                                                                                                                                                       | songorine*                                                                   | ACD            | others    |
| 21 | 11.089 | C <sub>16</sub> H <sub>18</sub> O <sub>9</sub>                 | -H | 353.0878 | 0.00  | [M-H-C <sub>4</sub> H <sub>8</sub> O <sub>4</sub> ]233.0446<br>[M-H-C <sub>5</sub> H <sub>8</sub> O <sub>5</sub> ]205.0499<br>[M-H-glc]191.0335<br>[M-H-glc-CO]163.0384                                                                                                                                                                                 | chlorogenic acid*                                                            | EU/CC/PG       | others    |
| 22 | 11.650 | C <sub>37</sub> H <sub>53</sub> N <sub>3</sub> O <sub>16</sub> | +H | 796.3489 | -1.26 | [M-hex]634.2836<br>[M-2hex]472.2578<br>[M-2hex-C <sub>9</sub> H <sub>7</sub> O <sub>3</sub> ]310.2133<br>[M-2hex-C <sub>13</sub> H <sub>20</sub> N <sub>2</sub> O <sub>3</sub> ]220.0965<br>[M-hex-C <sub>16</sub> H <sub>26</sub> N <sub>3</sub> O <sub>3</sub> ]163.0396                                                                              | N-caffeoyl, N'-dihydrocaffeoyl spermidine dihexose                           | LB             | others    |
| 23 | 11.747 | C <sub>31</sub> H <sub>43</sub> N <sub>3</sub> O <sub>11</sub> | +H | 634.2956 | -3.15 | [M-hex]472.2495<br>[M-hex-C <sub>9</sub> H <sub>7</sub> O <sub>3</sub> ]310.2101<br>[M-hex-C <sub>13</sub> H <sub>20</sub> N <sub>2</sub> O <sub>3</sub> ]220.0966<br>[M-hex-C <sub>16</sub> H <sub>26</sub> N <sub>3</sub> O <sub>3</sub> ]163.0382                                                                                                    | N <sub>1</sub> -dihydrocaffeoyl, N <sub>10</sub> -caffeoyl spermidine hexose | LB             | others    |
| 24 | 11.781 | C <sub>16</sub> H <sub>18</sub> O <sub>9</sub>                 | -H | 353.0868 | -2.83 | [M-H-C <sub>4</sub> H <sub>8</sub> O <sub>4</sub> ]233.0436<br>[M-H-C <sub>5</sub> H <sub>8</sub> O <sub>5</sub> ]205.0495<br>[M-glc]191.0345<br>[M-glc-CH <sub>2</sub> O]161.0600                                                                                                                                                                      | cryptochlorogenic acid                                                       | EU/PG          | others    |
| 25 | 11.801 | C <sub>34</sub> H <sub>41</sub> N <sub>3</sub> O <sub>9</sub>  | +H | 636.3134 | 1.10  | [M-hex]474.2641<br>[M-hex-C <sub>12</sub> H <sub>17</sub> N <sub>2</sub> O <sub>3</sub> ]236.1305<br>[M-hex-C <sub>13</sub> H <sub>20</sub> N <sub>2</sub> O <sub>3</sub> ]222.1127<br>[M-hex-C <sub>16</sub> H <sub>26</sub> N <sub>3</sub> O <sub>3</sub> ]165.0541<br>[M-hex-C <sub>18</sub> H <sub>28</sub> N <sub>3</sub> O <sub>4</sub> ]123.0471 | N <sub>1</sub> , N <sub>10</sub> -dihydrocaffeoyl spermidine hexose          | LB             | others    |

|                                                                                |        |                                                                |    |          |       |                                                                                |                                                                                     |     |        |
|--------------------------------------------------------------------------------|--------|----------------------------------------------------------------|----|----------|-------|--------------------------------------------------------------------------------|-------------------------------------------------------------------------------------|-----|--------|
| 26                                                                             | 12.385 | C <sub>24</sub> H <sub>39</sub> NO <sub>7</sub>                | +H | 454.2812 | 2.64  | [M+H-H <sub>2</sub> O]436.2698                                                 | fuziline*                                                                           | ACD | others |
|                                                                                |        |                                                                |    |          |       | [M+H-CH <sub>3</sub> OH]422.2535                                               |                                                                                     |     |        |
|                                                                                |        |                                                                |    |          |       | [M+H-2H <sub>2</sub> O]418.2586                                                |                                                                                     |     |        |
|                                                                                |        |                                                                |    |          |       | [M+H-CH <sub>3</sub> OH-H <sub>2</sub> O]404.2430                              |                                                                                     |     |        |
|                                                                                |        |                                                                |    |          |       | [M+H-2H <sub>2</sub> O-CH <sub>3</sub> OH]386.2318                             |                                                                                     |     |        |
| [M+H-2H <sub>2</sub> O-2CH <sub>3</sub> OH]354.2055                            |        |                                                                |    |          |       |                                                                                |                                                                                     |     |        |
| 27                                                                             | 13.092 | C <sub>31</sub> H <sub>45</sub> N <sub>3</sub> O <sub>11</sub> | +H | 634.2951 | -3.94 | [M-hex]472.2495                                                                | N <sub>1</sub> -dihydrocaffeoyl, N <sub>10</sub> -<br>caffeoyl spermidine<br>hexose | LB  | others |
|                                                                                |        |                                                                |    |          |       | [M-hex-C <sub>9</sub> H <sub>7</sub> O <sub>3</sub> ]310.2101                  |                                                                                     |     |        |
|                                                                                |        |                                                                |    |          |       | [M-hex-C <sub>12</sub> H <sub>15</sub> N <sub>2</sub> O <sub>3</sub> ]236.1276 |                                                                                     |     |        |
|                                                                                |        |                                                                |    |          |       | [M-hex-C <sub>13</sub> H <sub>20</sub> N <sub>2</sub> O <sub>3</sub> ]220.0966 |                                                                                     |     |        |
| [M-hex-C <sub>16</sub> H <sub>26</sub> N <sub>3</sub> O <sub>3</sub> ]163.0382 |        |                                                                |    |          |       |                                                                                |                                                                                     |     |        |
| 28                                                                             | 13.286 | C <sub>24</sub> H <sub>39</sub> NO <sub>6</sub>                | +H | 438.2854 | 0.91  | [M+H-H <sub>2</sub> O]420.2746                                                 | neoline*                                                                            | ACD | others |
|                                                                                |        |                                                                |    |          |       | [M+H-H <sub>2</sub> O-CH <sub>3</sub> OH]388.2484                              |                                                                                     |     |        |
|                                                                                |        |                                                                |    |          |       | [M+H-2CH <sub>3</sub> OH-H <sub>2</sub> O]356.2231                             |                                                                                     |     |        |
| 29                                                                             | 13.520 | C <sub>25</sub> H <sub>36</sub> N <sub>3</sub> O <sub>6</sub>  | +H | 474.2598 | -0.21 | [M-C <sub>13</sub> H <sub>20</sub> N <sub>2</sub> O <sub>3</sub> ]222.1114     | N <sub>1</sub> , N <sub>10</sub> -bis-<br>(dihydrocaffeoyl)<br>spermidine           | LB  | others |
|                                                                                |        |                                                                |    |          |       | [M-C <sub>16</sub> H <sub>26</sub> N <sub>3</sub> O <sub>3</sub> ]165.0561     |                                                                                     |     |        |
|                                                                                |        |                                                                |    |          |       | [M-C <sub>18</sub> H <sub>28</sub> N <sub>3</sub> O <sub>4</sub> ]123.0423     |                                                                                     |     |        |
| 30                                                                             | 13.808 | C <sub>35</sub> H <sub>48</sub> O <sub>21</sub>                | -H | 801.2443 | 1.97  | [M-H-H <sub>2</sub> O]783.2332                                                 | cistantubuloside C1                                                                 | CT  | others |
|                                                                                |        |                                                                |    |          |       | [M-H-H <sub>2</sub> O-claffeoy]621.2010                                        |                                                                                     |     |        |
|                                                                                |        |                                                                |    |          |       | [claffeoyl+H <sub>2</sub> O]179.0349                                           |                                                                                     |     |        |
|                                                                                |        |                                                                |    |          |       | [claffeoyl]161.0241                                                            |                                                                                     |     |        |
|                                                                                |        |                                                                |    |          |       | [M-H-caffeoyl-2glc-rha]135.0451                                                |                                                                                     |     |        |
| [claffeoyl-CO]133.0286                                                         |        |                                                                |    |          |       |                                                                                |                                                                                     |     |        |
| 31                                                                             | 14.825 | C <sub>25</sub> H <sub>33</sub> N <sub>3</sub> O <sub>6</sub>  | +H | 472.2452 | 2.12  | [M+H-C <sub>9</sub> H <sub>7</sub> O <sub>3</sub> ]310.2143                    | N <sub>1</sub> -dihydrocaffeoyl, N <sub>10</sub> -<br>caffeoyl spermidine           | LB  | others |
|                                                                                |        |                                                                |    |          |       | [M-C <sub>13</sub> H <sub>20</sub> N <sub>2</sub> O <sub>3</sub> ]220.0975     |                                                                                     |     |        |
|                                                                                |        |                                                                |    |          |       | [M-C <sub>16</sub> H <sub>26</sub> N <sub>3</sub> O <sub>3</sub> ]163.0383     |                                                                                     |     |        |
|                                                                                |        |                                                                |    |          |       | [M-C <sub>17</sub> H <sub>26</sub> N <sub>3</sub> O <sub>4</sub> ]135.0452     |                                                                                     |     |        |



|    |        |                                                 |     |          |       |                                                                                                                                                                                                                                               |                  |       |            |
|----|--------|-------------------------------------------------|-----|----------|-------|-----------------------------------------------------------------------------------------------------------------------------------------------------------------------------------------------------------------------------------------------|------------------|-------|------------|
| 32 | 15.791 | C <sub>29</sub> H <sub>36</sub> O <sub>16</sub> | -H  | 639.1921 | 1.5   | [M-H-H <sub>2</sub> O]621.1826<br>[M-H-H <sub>2</sub> O-claffeoyl]459.1508<br>[claffeoyl+H <sub>2</sub> O]179.0348<br>[claffeoyl]161.0240<br>[M-H-caffeoyl-glc-rha]135.0446<br>[claffeoyl-CO]133.0293                                         | campneoside II   | CT    | others     |
| 33 | 15.834 | C <sub>17</sub> H <sub>18</sub> O <sub>9</sub>  | +Na | 389.0844 | -1.29 | [M-glc]187.0397<br>[M-glc-CO]159.0446<br>[M-glc-COO]143.0507<br>[M-glc-2CO]131.0500<br>[M-glc-CO-COO]115.0538                                                                                                                                 | psoralenoside    | PC    | others     |
| 34 | 15.985 | C <sub>21</sub> H <sub>20</sub> O <sub>9</sub>  | -H  | 415.1031 | 0.86  | [M-H-glc]253.0499<br>[M-H-glc-H]252.0417<br>[M-H-glc-2H-CO]223.0398<br>[M-H-glc-2CO-H]195.0448                                                                                                                                                | daidzoside       | PC/GU | flavonoids |
| 35 | 16.153 | C <sub>29</sub> H <sub>36</sub> O <sub>16</sub> | -H  | 639.1924 | 1.03  | [M-H-H <sub>2</sub> O]621.1840<br>[M-H-H <sub>2</sub> O-claffeoyl]459.1508<br>[claffeoyl+H <sub>2</sub> O]179.0350<br>[claffeoyl]161.0242<br>[M-H-caffeoyl-glc-rha]135.0452<br>[claffeoyl-CO]133.0290                                         | campneoside II   | CT    | others     |
| 36 | 16.191 | C <sub>35</sub> H <sub>46</sub> O <sub>20</sub> | -H  | 785.2499 | 1.27  | [M-H-caffeoyl]623.2241<br>[M-H-caffeoyl-rha]477.1564<br>[M-H-caffeoyl-glc]461.1610<br>[M-H-caffeoyl-glc-rha]315.1080<br>[caffeoyl+H <sub>2</sub> O]179.0331<br>[caffeoyl]161.0238<br>[M-H-caffeoyl-2glc-rha]153.0503<br>[caffeoyl-CO]133.0275 | purpureaside B/C | RG    | others     |

|                     |        |                                                 |       |          |       |                                                                                  |                        |    |            |
|---------------------|--------|-------------------------------------------------|-------|----------|-------|----------------------------------------------------------------------------------|------------------------|----|------------|
| 37                  | 16.383 | C <sub>27</sub> H <sub>32</sub> O <sub>14</sub> | -H    | 579.1717 | 0.4   | [M-H-glc]417.1143                                                                | glucoliquiritin        | GU | flavonoids |
|                     |        |                                                 |       |          |       | [M-H-2glc]255.0665                                                               |                        |    |            |
|                     |        |                                                 |       |          |       | [M-H-2glc-C <sub>8</sub> H <sub>7</sub> O]135.0091                               |                        |    |            |
|                     |        |                                                 |       |          |       | [M-H-2glc-C <sub>7</sub> H <sub>3</sub> O <sub>3</sub> ]119.0499                 |                        |    |            |
| 38                  | 16.461 | C <sub>35</sub> H <sub>46</sub> O <sub>20</sub> | -H    | 785.2505 | 0.51  | [M-H-2glc-C <sub>8</sub> H <sub>7</sub> O-C <sub>2</sub> H <sub>4</sub> ]91.0185 | purpureaside B/C       | RG | others     |
|                     |        |                                                 |       |          |       | [M-H-caffeoyl]623.2140                                                           |                        |    |            |
|                     |        |                                                 |       |          |       | [M-H-caffeoyl-rha]477.1680                                                       |                        |    |            |
|                     |        |                                                 |       |          |       | [M-H-caffeoyl-glc]461.1609                                                       |                        |    |            |
|                     |        |                                                 |       |          |       | [claffeoyl+H <sub>2</sub> O]179.0331                                             |                        |    |            |
| [claffeoyl]161.0238 |        |                                                 |       |          |       |                                                                                  |                        |    |            |
| 39                  | 16.499 | C <sub>17</sub> H <sub>18</sub> O <sub>9</sub>  | +Na   | 389.0849 | 0.00  | [M-H-caffeoyl-2glc-rha]153.0503                                                  | isopsoralenoside       | PC | others     |
|                     |        |                                                 |       |          |       | [claffeoyl-CO]133.0275                                                           |                        |    |            |
|                     |        |                                                 |       |          |       | [M-glc]187.0400                                                                  |                        |    |            |
|                     |        |                                                 |       |          |       | [M-glc-CO]159.0449                                                               |                        |    |            |
| 40                  | 16.730 | C <sub>35</sub> H <sub>46</sub> O <sub>20</sub> | -H    | 785.2488 | 2.67  | [M-glc-2CO]131.0471                                                              | echinacoside*          | CT | others     |
|                     |        |                                                 |       |          |       | [M-H-caffeoyl]623.2179                                                           |                        |    |            |
|                     |        |                                                 |       |          |       | [M-H-caffeoyl-rha]477.1598                                                       |                        |    |            |
|                     |        |                                                 |       |          |       | [M-H-caffeoyl-glc]461.1656                                                       |                        |    |            |
|                     |        |                                                 |       |          |       | [M-H-caffeoyl-glc-rha]315.1076                                                   |                        |    |            |
| [claffeoyl]179.0342 |        |                                                 |       |          |       |                                                                                  |                        |    |            |
| 41                  | 17.172 | C <sub>42</sub> H <sub>74</sub> O <sub>15</sub> | +HCOO | 863.4986 | 2.85  | [claffeoyl-H <sub>2</sub> O]161.0241                                             | hosenkoside N+2H       | IB | saponins   |
|                     |        |                                                 |       |          |       | [M-H-caffeoyl-2glc-rha]153.0553                                                  |                        |    |            |
|                     |        |                                                 |       |          |       | [claffeoyl-CO]133.0290                                                           |                        |    |            |
|                     |        |                                                 |       |          |       | [M-H]817.4957                                                                    |                        |    |            |
| 42                  | 17.260 | C <sub>16</sub> H <sub>24</sub> O <sub>9</sub>  | -H    | 359.1340 | -2.23 | [M-H-glc]655.4425                                                                | 8-epideoxyloganic acid | CT | others     |
|                     |        |                                                 |       |          |       | [M-H-glc]197.0739                                                                |                        |    |            |
|                     |        |                                                 |       |          |       | [M-H-glc-COO]153.0888                                                            |                        |    |            |
|                     |        |                                                 |       |          |       | [M-H-glc-COO-H <sub>2</sub> O]135.0783                                           |                        |    |            |

|    |        |                                                 |    |          |       |                                                                                                                                                                                                                                                                                                         |                                |       |            |
|----|--------|-------------------------------------------------|----|----------|-------|---------------------------------------------------------------------------------------------------------------------------------------------------------------------------------------------------------------------------------------------------------------------------------------------------------|--------------------------------|-------|------------|
| 43 | 17.549 | C <sub>26</sub> H <sub>28</sub> O <sub>16</sub> | -H | 595.1284 | -2.52 | [M-H-rha]447.0923<br>[M-H-rha-H]446.0855<br>[M-H-2rha]301.0351<br>[M-H-2rha-2H]299.0185<br>[M-H-2rha-2H-CO]271.0241                                                                                                                                                                                     | quercetin-3-O-arabinoglucoside | EC/EB | flavonoids |
| 44 | 17.575 | C <sub>27</sub> H <sub>32</sub> O <sub>14</sub> | -H | 579.1714 | 0.91  | [M-H-glc]417.1143<br>[M-H-2glc]255.0665<br>[M-H-2glc-C <sub>8</sub> H <sub>7</sub> O]135.0091<br>[M-H-2glc-C <sub>7</sub> H <sub>3</sub> O <sub>3</sub> ]119.0499<br>[M-H-2glc-C <sub>8</sub> H <sub>7</sub> O-C <sub>2</sub> H <sub>4</sub> ]91.0185                                                   | glucoisoliquiritin             | GU    | flavonoids |
| 45 | 17.689 | C <sub>27</sub> H <sub>30</sub> O <sub>16</sub> | -H | 609.1461 | 0.01  | [M-H-glc-rha]300.0270<br>[M-H-glc-rha-CO]271.0225<br>[M-H-glc-rha-CO-OH]255.0310<br>[M-H-glc-rha-2CO]243.0311                                                                                                                                                                                           | rutin*                         | EU/CS | flavonoids |
| 46 | 17.891 | C <sub>35</sub> H <sub>46</sub> O <sub>19</sub> | -H | 769.2549 | 1.43  | [M-H-claffeoyl]623.2144<br>[M-H-claffeoyl-O]607.2243<br>[M-H-claffeoyl-glc]461.1796<br>[M-C <sub>26</sub> H <sub>39</sub> O <sub>6</sub> ]163.0398<br>[M-C <sub>26</sub> H <sub>39</sub> O <sub>6</sub> -H <sub>2</sub> O]145.0295<br>[M-C <sub>26</sub> H <sub>39</sub> O <sub>6</sub> -HCOOH]135.0463 | poliumoside                    | CT/RG | others     |
| 47 | 18.261 | C <sub>38</sub> H <sub>50</sub> O <sub>22</sub> | -H | 857.2704 | 1.98  | [M-H-caffeoyl]695.2231<br>[M-H-caffeoyl-COCH <sub>2</sub> ]653.2276<br>[claffeoyl+H <sub>2</sub> O]179.0344<br>[claffeoyl]161.0233<br>[claffeoyl-CO]133.0341                                                                                                                                            | kankanosides K1                | CT/RG | others     |
| 48 | 18.501 | C <sub>26</sub> H <sub>30</sub> O <sub>13</sub> | -H | 549.1595 | 3.28  | [M-H-api]417.1268<br>[M-H-api-glc]255.0649<br>[M-H-api-glc-C <sub>8</sub> H <sub>7</sub> O]135.0092<br>[M-H-api-glc-C <sub>7</sub> H <sub>3</sub> O <sub>3</sub> ]119.0491<br>[M-H-api-glc-C <sub>8</sub> H <sub>7</sub> O-C <sub>2</sub> H <sub>4</sub> ]91.0176                                       | liquiritin apioside*           | GU    | flavonoids |

|    |        |                                                  |       |           |       |                                                                                                                                                                                                                                                                                                        |                                |             |            |
|----|--------|--------------------------------------------------|-------|-----------|-------|--------------------------------------------------------------------------------------------------------------------------------------------------------------------------------------------------------------------------------------------------------------------------------------------------------|--------------------------------|-------------|------------|
| 49 | 18.541 | C <sub>27</sub> H <sub>44</sub> O <sub>7</sub>   | +HCOO | 525.3052  | -2.28 | [M-H]479.3051<br>[M-C <sub>8</sub> H <sub>17</sub> O <sub>3</sub> ]319.1797<br>[M-C <sub>8</sub> H <sub>17</sub> O <sub>3</sub> -H <sub>2</sub> O]301.1816<br>[C <sub>8</sub> H <sub>15</sub> O <sub>3</sub> ]159.1061                                                                                 | β-ecdysterone                  | AB          | others     |
| 50 | 18.595 | C <sub>21</sub> H <sub>22</sub> O <sub>9</sub>   | -H    | 417.1188  | 0.48  | [M-H-glc]255.0654<br>[M-H-glc-C <sub>8</sub> H <sub>7</sub> O]135.0080<br>[M-H-glc-C <sub>7</sub> H <sub>3</sub> O <sub>3</sub> ]119.0494<br>[M-H-glc-C <sub>8</sub> H <sub>7</sub> O-C <sub>2</sub> H <sub>4</sub> ]91.0174                                                                           | liquiritin*                    | GU          | flavonoids |
| 51 | 18.675 | C <sub>17</sub> H <sub>19</sub> NO <sub>4</sub>  | +H    | 302.1390  | 0.99  | [M-C <sub>10</sub> H <sub>12</sub> NO <sub>2</sub> ]123.0366<br>[M-C <sub>9</sub> H <sub>10</sub> NO <sub>3</sub> ]121.0663<br>[M-C <sub>10</sub> H <sub>10</sub> NO <sub>3</sub> -H <sub>2</sub> O]91.0527                                                                                            | dihydro-N-<br>caffeoyltyramine | LB          | others     |
| 52 | 18.679 | C <sub>49</sub> H <sub>85</sub> NO <sub>19</sub> | +HCOO | 1036.5668 | 3.01  | [M-H]990.5601<br>[M-H-xy]858.517<br>[M-H-glc]828.5121<br>[M-H-glc-xy]696.469<br>[M-H-2glc-xy]534.414<br>[glc+xy]H-C <sub>3</sub> H <sub>6</sub> O <sub>3</sub> ]221.066                                                                                                                                | C32H55NO4+2glc+xy]1            | IB          | others     |
| 53 | 18.967 | C <sub>21</sub> H <sub>20</sub> O <sub>12</sub>  | -H    | 463.0875  | 1.51  | [M-H-glc]301.0350<br>[M-H-glc-H]300.0260<br>[M-H-glc-CH <sub>2</sub> O]271.0229<br>[M-H-glc-CH <sub>2</sub> O-OH]255.0293<br>[M-H-glc-CH <sub>2</sub> O-CO]243.0285<br>[M-H-glc-CH <sub>2</sub> O-OH-CO]227.0320                                                                                       | hyperoside*                    | EC/EU/CS/CC | flavonoids |
| 54 | 18.970 | C <sub>37</sub> H <sub>48</sub> O <sub>21</sub>  | -H    | 827.2607  | 0.97  | [M-H-COCH <sub>2</sub> ]785.2545<br>[M-H-claffeoyl]665.2277<br>[M-H-claffeoyl-COCH <sub>2</sub> ]623.2173<br>[M-H-claffeoyl-COCH <sub>2</sub> -rha]477.1573<br>[M-H-claffeoyl-COCH <sub>2</sub> -glc]461.1683<br>[claffeoyl+H <sub>2</sub> O]179.0339<br>[claffeoyl]161.0236<br>[claffeoyl-CO]133.0285 | tubuloside A                   | CT          | others     |

|    |        |                                                  |       |          |       |                                                                                                                                                                                       |                                                          |       |            |
|----|--------|--------------------------------------------------|-------|----------|-------|---------------------------------------------------------------------------------------------------------------------------------------------------------------------------------------|----------------------------------------------------------|-------|------------|
| 55 | 19.006 | C <sub>27</sub> H <sub>30</sub> O <sub>14</sub>  | -H    | 577.155  | -1.21 | [M-H-rha]431.0935<br>[M-H-2rha]285.0386<br>[M-H-2rha-2H]283.0219<br>[M-H-2rha-2H-H <sub>2</sub> O]255.0302                                                                            | kaempferitrin                                            | EB    | flavonoids |
| 56 | 19.024 | C <sub>44</sub> H <sub>77</sub> NO <sub>15</sub> | +HCOO | 904.5244 | 3.63  | [M-H]858.52<br>[M-H-glc]696.468<br>[M-H-2glc]534.414<br>[2glc-H-C <sub>4</sub> H <sub>8</sub> O <sub>4</sub> ]221.066                                                                 | C <sub>32</sub> H <sub>55</sub> NO <sub>4</sub> +2glc    | IB    | others     |
| 57 | 19.165 | C <sub>21</sub> H <sub>20</sub> O <sub>12</sub>  | -H    | 463.0872 | 2.16  | [M-H-glc]300.0268<br>[M-H-glc-CH <sub>2</sub> O]271.0232<br>[M-glc-CH <sub>2</sub> O-OH]255.0288<br>[M-H-glc-CH <sub>2</sub> O-CO]243.0302<br>[M-glc-CH <sub>2</sub> O-OH-CO]227.0358 | isoquercitrin*                                           | EC/EU | flavonoids |
| 58 | 19.204 | C <sub>27</sub> H <sub>44</sub> O <sub>7</sub>   | +HCOO | 525.3054 | -1.90 | [M-H]479.3051<br>[M-C <sub>8</sub> H <sub>17</sub> O <sub>3</sub> ]319.1813<br>[M-C <sub>8</sub> H <sub>17</sub> O <sub>3</sub> -H <sub>2</sub> O]301.1803                            | (25S)-inokosterone*                                      | AB    | others     |
| 59 | 19.260 | C <sub>29</sub> H <sub>36</sub> O <sub>15</sub>  | -H    | 623.1973 | 1.28  | [M-H-claffeoyl]461.1660<br>[M-H-claffeoyl-rha]315.1083<br>[claffeoyl+H <sub>2</sub> O]179.0346<br>[claffeoyl]161.0244<br>[claffeoyl-CO]133.0290                                       | acteoside*                                               | CT/RG | others     |
| 60 | 19.514 | C <sub>43</sub> H <sub>75</sub> NO <sub>14</sub> | +HCOO | 874.5146 | 2.84  | [M-H]828.5101<br>[M-H-xyl]696.468<br>[M-H-xyl-glc]534.414<br>[glc+xyl-H-C <sub>3</sub> H <sub>6</sub> O <sub>3</sub> ]221.066                                                         | C <sub>32</sub> H <sub>55</sub> NO <sub>4</sub> +glc+xyl | IB    | others     |
| 61 | 19.984 | C <sub>34</sub> H <sub>44</sub> O <sub>19</sub>  | -H    | 755.2401 | 0.26  | [M-H-claffeoyl]593.2101<br>[claffeoyl+H <sub>2</sub> O]179.0331<br>[claffeoyl]161.0225<br>[claffeoyl-CO]133.0291                                                                      | myricoside                                               | CT    | others     |

|    |        |                                                 |       |           |       |                                                                                                                                                 |                                                 |             |            |
|----|--------|-------------------------------------------------|-------|-----------|-------|-------------------------------------------------------------------------------------------------------------------------------------------------|-------------------------------------------------|-------------|------------|
| 62 | 20.110 | C <sub>29</sub> H <sub>36</sub> O <sub>15</sub> | -H    | 623.1966  | 2.41  | [M-H-claffeoyl]461.1651<br>[M-H-claffeoyl-rha]315.1106<br>[claffeoyl+H <sub>2</sub> O]179.0338<br>[claffeoyl]161.0234<br>[claffeoyl-CO]133.0280 | isoacteoside*                                   | CT/RG       | others     |
| 63 | 20.204 | C <sub>21</sub> H <sub>20</sub> O <sub>11</sub> | -H    | 447.0927  | -1.57 | [M-H-rha]301.0338<br>[M-H-rha-H]300.0249<br>[M-H-rha-CO-H]271.0273<br>[M-H-rha-CO-OH]255.0295                                                   | quercitrin                                      | PC/EC/GU/EB | flavonoids |
| 64 | 20.304 | C <sub>42</sub> H <sub>72</sub> O <sub>15</sub> | +HCOO | 861.4835  | 2.67  | [M-H]815.4791<br>[M-H-glc]653.4254<br>[M-H-2glc]491.3731<br>[M-H-2glc-CH <sub>3</sub> OH]459.3431<br>[glc-H]161.0441                            | hosenkoside N                                   | IB          | saponins   |
| 65 | 20.348 | C <sub>48</sub> H <sub>82</sub> O <sub>20</sub> | +HCOO | 1023.5361 | 1.95  | [M-H]977.5308<br>[M-H-glc]815.4777<br>[M-H-2glc]653.4250<br>[M-H-3glc]491.3727                                                                  | hosenkoside B                                   | IB          | saponins   |
| 66 | 20.594 | C <sub>29</sub> H <sub>36</sub> O <sub>14</sub> | -H    | 607.2019  | 2.14  | [claffeoyl+H <sub>2</sub> O]179.0348<br>[claffeoyl]161.0234<br>[claffeoyl-CO]133.0287                                                           | syringalide a 3'-α-l<br>-rhamnopyranoside*      | CT          | others     |
| 67 | 20.671 | C <sub>23</sub> H <sub>22</sub> O <sub>13</sub> | -H    | 505.0985  | 0.59  | [M-H-CH <sub>2</sub> O-glc]300.0249<br>[M-H-CH <sub>2</sub> O-glc-H]271.0273<br>[M-H-CH <sub>2</sub> O-glc-OH]255.0295                          | quercetin-3-O-<br>glucose-6"-acetate            | EC          | flavonoids |
| 68 | 20.818 | C <sub>32</sub> H <sub>38</sub> O <sub>16</sub> | -H    | 677.2073  | 2.08  | [M-H-rha]530.1434<br>[M-H-rha-glc]369.1008<br>[M-H-rha-glc-2H]367.0819                                                                          | anhydroicaritin-3-O-<br>glucoside(1-2)-rhamnose | EB          | flavonoids |
| 69 | 20.850 | C <sub>47</sub> H <sub>80</sub> O <sub>19</sub> | +HCOO | 993.5248  | 1.31  | [M-H-xyl]815.4747<br>[M-H-xyl-glc]653.4521                                                                                                      | hosenkoside F                                   | IB          | saponins   |
| 70 | 21.012 | C <sub>9</sub> H <sub>16</sub> O <sub>4</sub>   | -H    | 187.0968  | -4.28 | [M-C <sub>2</sub> H <sub>5</sub> O-H <sub>2</sub> O]125.0963                                                                                    | epieucmmiol                                     | EU-neg      | others     |

| eucommiol |        |                                                  |       |           |       |                                                                                                                                             |                     |     |            |
|-----------|--------|--------------------------------------------------|-------|-----------|-------|---------------------------------------------------------------------------------------------------------------------------------------------|---------------------|-----|------------|
| 71        | 21.025 | C <sub>21</sub> H <sub>34</sub> O <sub>9</sub>   | -H    | 429.2123  | -1.63 | [M-glc]267.1581<br>[M-glc-H <sub>2</sub> O]249.1471                                                                                         | neorehmannioside D  | RG  | others     |
| 72        | 21.066 | C <sub>17</sub> H <sub>17</sub> NO <sub>4</sub>  | +H    | 300.1232  | 0.33  | [M-C <sub>8</sub> H <sub>10</sub> NO]163.0400<br>[M-C <sub>8</sub> H <sub>10</sub> NO-CO]135.0444                                           | N-caffeoyltyramine  | LB  | others     |
| 73        | 21.114 | C <sub>32</sub> H <sub>38</sub> O <sub>16</sub>  | -H    | 677.2083  | 0.6   | [M-H-glc]515.1533<br>[M-H-2glc]353.1018<br>[M-H-2glc-2H]351.0853<br>[M-H-2glc-2H-CO]323.0918                                                | hexandraside E      | EB  | flavonoids |
| 74        | 21.126 | C <sub>21</sub> H <sub>22</sub> O <sub>10</sub>  | -H    | 433.1132  | -0.69 | [M-H-glc]271.0585<br>[M-H-glc-C <sub>8</sub> H <sub>8</sub> O]151.0005<br>[M-H-glc-C <sub>5</sub> H <sub>3</sub> O <sub>4</sub> ]119.0475   | prunin              | GU  | flavonoids |
| 75        | 21.360 | C <sub>48</sub> H <sub>82</sub> O <sub>19</sub>  | +HCOO | 1007.5411 | 1.59  | [M-H-glc]799.4407<br>[M-H-2glc]637.4231<br>[M-H-3glc]475.3824<br>[M-H-3glc-C <sub>6</sub> H <sub>12</sub> ]391.2827                         | 20-O-gluginoside-Rf | PG  | saponins   |
| 76        | 21.416 | C <sub>37</sub> H <sub>46</sub> O <sub>19</sub>  | -H    | 793.2545  | 1.96  | [M-H-glc]631.2026<br>[M-H-rha-xyl]514.1464<br>[M-H-rha-xyl-glc-H]351.0872<br>[M-H-rha-xyl-glc-H-CO]323.0928                                 | epimedeside D       | EB  | flavonoids |
| 77        | 21.599 | C <sub>31</sub> H <sub>43</sub> NO <sub>19</sub> | +H    | 590.2969  | 1.52  | [M+H-CH <sub>3</sub> OH]558.2697<br>[M+H-CH <sub>3</sub> OH-H <sub>2</sub> O]540.2601<br>[M+H-2CH <sub>3</sub> OH-H <sub>2</sub> O]508.2361 | benzoylmesaconine*  | ACD | others     |
| 78        | 21.617 | C <sub>54</sub> H <sub>92</sub> O <sub>25</sub>  | +HCOO | 1185.5909 | 0.08  | [M-H-glc]977.5336<br>[M-H-glc-OH]960.5161<br>[M-H-2glc]815.4745<br>[M-H-3glc]653.4227<br>[M-H-4glc]489.3641                                 | hosenkoside K       | IB  | saponins   |

|    |        |                                                 |       |           |       |                                                                                                                                                                                                                         |                                |    |            |
|----|--------|-------------------------------------------------|-------|-----------|-------|-------------------------------------------------------------------------------------------------------------------------------------------------------------------------------------------------------------------------|--------------------------------|----|------------|
| 79 | 21.645 | C <sub>31</sub> H <sub>38</sub> O <sub>16</sub> | -H    | 665.2080  | 1.05  | [M-H-claffeoyl-COCH <sub>2</sub> ]461.1710<br>[claffeoyl+H <sub>2</sub> O]179.0314<br>[claffeoyl]161.0240<br>[claffeoyl-CO]133.0285                                                                                     | 2'-acetylacteoside             | CT | others     |
| 80 | 21.770 | C <sub>47</sub> H <sub>80</sub> O <sub>18</sub> | +HCOO | 977.5306  | 1.64  | [M-H-xy]799.4407<br>[M-H-xy]glc]637.4293<br>[M-H-xy]2glc]475.3890<br>[M-H-xy]2glc-C <sub>6</sub> H <sub>12</sub> ]391.2791                                                                                              | noto-ginsenoside-R1            | PG | saponins   |
| 81 | 21.798 | C <sub>39</sub> H <sub>50</sub> O <sub>22</sub> | -H    | 869.2704  | 1.95  | [M-H-glc]707.2300<br>[M-H-glc-COCH <sub>2</sub> ]665.2298<br>[M-H-glc-2COCH <sub>2</sub> ]623.2203<br>[claffeoyl]161.0243<br>[M-H-caffeoyl-2glc-rha-2COCH <sub>2</sub> ]135.0475<br>[claffeoyl-CO]133.0286              | acteoside-2Ac-glc              | CT | others     |
| 82 | 21.967 | C <sub>42</sub> H <sub>72</sub> O <sub>15</sub> | +HCOO | 861.4841  | 2.67  | [M-H]815.4747<br>[M-H-glc]653.4323                                                                                                                                                                                      | hosenkoside J<br>hosenkoside E | IB | saponins   |
| 83 | 22.071 | C <sub>21</sub> H <sub>20</sub> O <sub>10</sub> | -H    | 431.0966  | -2.78 | [M-H-rha] 285.0392<br>[M-H-rha-H]284.0323<br>[M-H-rha-H-CH <sub>2</sub> O]255.0291<br>[M-H-rha-CO-CH <sub>2</sub> O]227.0340<br>[M-H-rha-H-2CO-OH-H]211.0390<br>[M-H-rha-CO-CH <sub>2</sub> O-CO <sub>2</sub> ]183.0453 | kaempferin                     | EB | flavonoids |
| 84 | 22.174 | C <sub>32</sub> H <sub>38</sub> O <sub>15</sub> | -H    | 661.2114  | 2.72  | [M-H-rha]514.1443<br>[M-H-glc]499.1563<br>[M-H-glc-rha]353.1031<br>[M-H-glc-rha-2H]351.0898<br>[M-H-glc-rha-2H-CO]323.0959                                                                                              | ikarisoside B                  | EB | flavonoids |
| 85 | 22.255 | C <sub>53</sub> H <sub>90</sub> O <sub>24</sub> | +HCOO | 1155.5785 | 1.64  | [M-H]1109.5771<br>[M-H-xy]977.5362<br>[M-H-xy]glc]815.4768<br>[M-H-xy]2glc]653.4233                                                                                                                                     | hosenkoside M                  | IB | saponins   |



|    |        |                                                  |       |           |          |                                                                                                                                                                                                                |                                                                                           |          |            |
|----|--------|--------------------------------------------------|-------|-----------|----------|----------------------------------------------------------------------------------------------------------------------------------------------------------------------------------------------------------------|-------------------------------------------------------------------------------------------|----------|------------|
| 86 | 22.255 | C <sub>26</sub> H <sub>30</sub> O <sub>13</sub>  | -H    | 549.1595  | 3.277726 | [M-H-api-glc]255.0645<br>[M-H-api-glc-C <sub>7</sub> H <sub>8</sub> O]151.0397<br>[M-H-api-glc-C <sub>8</sub> H <sub>7</sub> O]135.0069<br>[M-H-api-glc-C <sub>7</sub> H <sub>3</sub> O <sub>3</sub> ]119.0487 | licuraside                                                                                | GU       | flavonoids |
| 87 | 22.382 | C <sub>48</sub> H <sub>82</sub> O <sub>20</sub>  | +HCOO | 1023.5337 | 1.95     | [M-H]977.5316<br>[M-H-glc]815.4786<br>[M-H-2glc]653.4260<br>[M-H-3glc]491.3737                                                                                                                                 | hosenkoside C                                                                             | IB       | saponins   |
| 88 | 22.540 | C <sub>42</sub> H <sub>72</sub> O <sub>14</sub>  | +HCOO | 845.4875  | 2.84     | [M-H-glc]637.4318<br>[M-H-2glc]475.3784<br>[M-H-2glc-C <sub>6</sub> H <sub>12</sub> ]391.2796                                                                                                                  | ginsenoside Rg1                                                                           | PG       | saponins   |
| 89 | 22.540 | C <sub>48</sub> H <sub>82</sub> O <sub>18</sub>  | +HCOO | 991.5461  | 1.71     | [M-H-rha]799.4831<br>[M-H-rha-glc]637.4303<br>[M-H-rha-2glc]475.3764<br>[M-H-rha-2glc-C <sub>6</sub> H <sub>12</sub> ]391.2911                                                                                 | ginsenoside Re                                                                            | PG       | saponins   |
| 90 | 22.596 | C <sub>29</sub> H <sub>32</sub> O <sub>15</sub>  | -H    | 619.1638  | -4.04    | [M-H-rha-CH <sub>2</sub> O]431.0956<br>[M-H-2rha-CH <sub>2</sub> O-2H]283.0233<br>[M-H-2rha-CH <sub>2</sub> O-2H-CO]255.0276                                                                                   | $\alpha$ -rhamnoisorobin-3- <i>O</i> -(3- <i>O</i> -acetyl- $\alpha$ -L-rhamnopyranoside) | EC/GU/EB | flavonoids |
| 91 | 22.802 | C <sub>31</sub> H <sub>38016</sub>               | -H    | 665.2063  | 3.61     | [M-H-glc]503.1834<br>[M-H-glc-COCH <sub>2</sub> ]461.1701<br>[claffeoyl+H <sub>2</sub> O]179.0333<br>[claffeoyl]161.0232<br>[claffeoyl-CO]133.0298                                                             | tubuloside B                                                                              | CT       | others     |
| 92 | 22.806 | C <sub>32</sub> H <sub>45</sub> NO <sub>10</sub> | +H    | 604.3115  | -0.17    | [M+H-H <sub>2</sub> O]586.3176<br>[M+H-CH <sub>3</sub> OH]572.2854<br>[M+H-CH <sub>3</sub> OH-H <sub>2</sub> O]554.2840<br>[M+H-2CH <sub>3</sub> OH-H <sub>2</sub> O]522.2520                                  | benzoylaconine*                                                                           | ACD      | alkaloid   |

|    |        |                                                 |       |           |          |                                                                                                                                                                                                                                                                                                                                        |                   |    |            |
|----|--------|-------------------------------------------------|-------|-----------|----------|----------------------------------------------------------------------------------------------------------------------------------------------------------------------------------------------------------------------------------------------------------------------------------------------------------------------------------------|-------------------|----|------------|
| 93 | 22.881 | C <sub>21</sub> H <sub>22</sub> O <sub>9</sub>  | -H    | 417.1194  | -0.95896 | [M-H-glc]255.0655<br>[M-H-glc-C <sub>7</sub> H <sub>8</sub> O]151.0449<br>[M-H-glc-C <sub>8</sub> H <sub>7</sub> O]135.0089<br>[M-H-glc-C <sub>7</sub> H <sub>3</sub> O <sub>3</sub> ]119.0486<br>[M-H-glc-C <sub>8</sub> H <sub>7</sub> O-C <sub>2</sub> H <sub>4</sub> ]91.0174                                                      | isoliquiritin*    | GU | flavonoids |
| 94 | 22.904 | C <sub>51</sub> H <sub>86</sub> O <sub>23</sub> | +HCOO | 1111.5533 | 1.88     | [M-H-rha]919.4995<br>[M-H-glc]903.4970<br>[M-H-rha-glc]757.4514<br>[M-H-rha-2glc]595.3811<br>[M-H-rha-3glc]433.3323                                                                                                                                                                                                                    | C27H4504+3glc+rha | AC | saponins   |
| 95 | 22.923 | C <sub>20</sub> H <sub>20</sub> O <sub>6</sub>  | +H    | 357.1332  | 0.18     | [M + H- C <sub>4</sub> H <sub>8</sub> O]285.0752<br>[M-C <sub>8</sub> H <sub>8</sub> O-C <sub>3</sub> H <sub>5</sub> -H <sub>2</sub> O]177.0552<br>[M-C <sub>8</sub> H <sub>8</sub> O-C <sub>4</sub> H <sub>7</sub> O]165.0188<br>[C <sub>9</sub> H <sub>7</sub> O <sub>2</sub> ]147.0446<br>[C <sub>8</sub> H <sub>7</sub> O]119.0492 | tomentosanol D    | PC | flavonone  |
| 96 | 22.978 | C <sub>50</sub> H <sub>84</sub> O <sub>23</sub> | -H    | 1051.5309 | 1.52     | [M-H-xyI]919.4923<br>[M-H-glc]889.4857<br>[M-H-glc-xyI]757.4370<br>[M-H-2glc-xyI]595.3870<br>[M-H-3glc-xyI]433.3363                                                                                                                                                                                                                    | officinalisin-II  | AC | saponins   |
| 97 | 23.021 | C <sub>51</sub> H <sub>86</sub> O <sub>23</sub> | +HCOO | 1111.5327 | 1.88     | [M-H-rha]919.4995<br>[M-H-glc]903.4970<br>[M-H-rha-glc]757.4514<br>[M-H-rha-2glc]595.3811<br>[M-H-rha-3glc]433.3323                                                                                                                                                                                                                    | C27H4504+3glc+rha | AC | saponins   |
| 98 | 23.290 | C <sub>45</sub> H <sub>76</sub> O <sub>19</sub> | +HCOO | 965.4932  | -2.59    | [M-H]919.4894<br>[M-H-glc]757.4365<br>[M-H-2glc]595.3864<br>[M-H-3glc]433.3307                                                                                                                                                                                                                                                         | asparagoside E    | AC | saponins   |

|     |        |                                                 |       |          |       |                                                                                                                                                                                                                                                                                                   |                                                                                                                                                                              |    |            |
|-----|--------|-------------------------------------------------|-------|----------|-------|---------------------------------------------------------------------------------------------------------------------------------------------------------------------------------------------------------------------------------------------------------------------------------------------------|------------------------------------------------------------------------------------------------------------------------------------------------------------------------------|----|------------|
| 99  | 23.294 | C <sub>31</sub> H <sub>40</sub> O <sub>15</sub> | -H    | 651.2326 | -4.91 | [M-C <sub>10</sub> H <sub>9</sub> O <sub>3</sub> ]475.1769<br>[C <sub>10</sub> H <sub>9</sub> O <sub>4</sub> ]193.0504<br>[C <sub>10</sub> H <sub>9</sub> O <sub>4</sub> -H <sub>2</sub> O]175.0390<br>[C <sub>10</sub> H <sub>9</sub> O <sub>4</sub> -H <sub>2</sub> O-CH <sub>3</sub> ]160.0172 | martyside                                                                                                                                                                    | RG | others     |
| 100 | 23.317 | C <sub>47</sub> H <sub>80</sub> O <sub>19</sub> | +HCOO | 993.5264 | 2.92  | [M-H-xy]815.4747<br>[M-H-xy]glc]653.4521                                                                                                                                                                                                                                                          | hosenkoside G                                                                                                                                                                | IB | saponins   |
| 101 | 23.415 | C <sub>45</sub> H <sub>76</sub> O <sub>19</sub> | +HCOO | 965.4931 | -2.59 | [M-H]919.4877<br>[M-H-glc]757.4365<br>[M-H-2glc]595.3839<br>[M-H-3glc]433.3329                                                                                                                                                                                                                    | asparagoside E                                                                                                                                                               | AC | saponins   |
| 102 | 23.438 | C <sub>39</sub> H <sub>48</sub> O <sub>20</sub> | -H    | 835.264  | 3.13  | [M-H-glc]673.2112<br>[M-H-gluA-rha]515.1519<br>[M-H-gluA-rha-glc]353.1021                                                                                                                                                                                                                         | 3-[(4-O-Acetyl-6-deoxy-3-O-β-D-xylopyranosyl-α-L-mannopyranosyl)oxy]-7-(β-D-glucopyranosyloxy)-5-hydroxy-2-(4-hydroxyphenyl)-8-(3-methyl-2-buten-1-yl)-4H-1-benzopyran-4-one | EB | flavonoids |
| 103 | 23.451 | C <sub>15</sub> H <sub>10</sub> O <sub>4</sub>  | +H    | 255.0649 | 1.12  | [M+H-CO]227.0699<br>[M+H-2CO]199.0753<br>[M+H-2CO-H <sub>2</sub> O]181.0645<br>[M+H-2CO-H <sub>2</sub> O-CHO]152.0622<br>[M+H-C <sub>8</sub> H <sub>6</sub> O]137.0232                                                                                                                            | daidzein                                                                                                                                                                     | PC | flavonoids |
| 104 | 23.474 | C <sub>42</sub> H <sub>72</sub> O <sub>15</sub> | +HCOO | 861.4830 | 2.67  | [M-H]815.4747<br>[M-H-glc]653.4323                                                                                                                                                                                                                                                                | hosenkoside J<br>hosenkoside E                                                                                                                                               | IB | saponins   |
| 105 | 23.599 | C <sub>20</sub> H <sub>18</sub> O <sub>6</sub>  | +H    | 355.1189 | -3.36 | [M+H-C <sub>3</sub> H <sub>6</sub> O-H <sub>2</sub> O]279.0647<br>[M+H-C <sub>3</sub> H <sub>6</sub> O-H <sub>2</sub> O-CO]251.0692<br>[M+H-C <sub>3</sub> H <sub>6</sub> O-H <sub>2</sub> O- <sub>2</sub> CO]223.0744                                                                            | 3-hydroxy-6-(4-hydroxyphenyl)-2-(2-hydroxypropan-2-yl)-2,3-dihydrofuro[3,2-g]chromen-5-one                                                                                   | PC | flavonoids |

|     |        |                                                 |       |           |          |                                                                                           |                                                                   |       |            |
|-----|--------|-------------------------------------------------|-------|-----------|----------|-------------------------------------------------------------------------------------------|-------------------------------------------------------------------|-------|------------|
| 106 | 23.658 | C <sub>31</sub> H <sub>43</sub> NO <sub>9</sub> | +H    | 574.3010  | -0.17    | [M+H-CH <sub>3</sub> OH]542.2744                                                          | benzoylhypocoitine*                                               | ACD   | alkaloid   |
|     |        |                                                 |       |           |          | [M+H-2CH <sub>3</sub> OH]510.2497                                                         |                                                                   |       |            |
|     |        |                                                 |       |           |          | [M+H-2CH <sub>3</sub> OH-H <sub>2</sub> O]492.2418                                        |                                                                   |       |            |
|     |        |                                                 |       |           |          | [M+H-3CH <sub>3</sub> OH]478.2166                                                         |                                                                   |       |            |
| 107 | 24.118 | C <sub>45</sub> H <sub>58</sub> O <sub>24</sub> | +HCOO | 1027.3275 | 2.55     | [M+H-3CH <sub>3</sub> OH-H <sub>2</sub> O]456.1717                                        | anhydroicaritin-3-O-rhamnoidide(1-2)-furan acid-7-O-glucoside+glc | EB    | flavonoids |
|     |        |                                                 |       |           |          | [M-H-glc]819.2691                                                                         |                                                                   |       |            |
|     |        |                                                 |       |           |          | [M-H-glc-C <sub>12</sub> H <sub>18</sub> O <sub>8</sub> ]529.1697                         |                                                                   |       |            |
|     |        |                                                 |       |           |          | [M-H-glc-C <sub>12</sub> H <sub>18</sub> O <sub>8</sub> -O]513.1769                       |                                                                   |       |            |
|     |        |                                                 |       |           |          | [M-H-2glc-C <sub>12</sub> H <sub>18</sub> O <sub>8</sub> ]367.1173                        |                                                                   |       |            |
| 108 | 24.161 | C <sub>48</sub> H <sub>82</sub> O <sub>20</sub> | +HCOO | 1023.5356 | 2.44     | [M-H-2glc-C <sub>12</sub> H <sub>18</sub> O <sub>8</sub> -O]351.0883                      | hosenkoside A                                                     | IB    | saponins   |
|     |        |                                                 |       |           |          | [M-H-2glc-C <sub>12</sub> H <sub>18</sub> O <sub>8</sub> -CO <sub>2</sub> ]323.0924       |                                                                   |       |            |
|     |        |                                                 |       |           |          | [M-H]977.5316                                                                             |                                                                   |       |            |
|     |        |                                                 |       |           |          | [M-H-glc]815.4789                                                                         |                                                                   |       |            |
| 109 | 24.336 | C <sub>41</sub> H <sub>70</sub> O <sub>14</sub> | +HCOO | 831.4766  | -2.16    | [M-H-2glc]653.4255                                                                        | hosenkoside H                                                     | IB    | saponins   |
|     |        |                                                 |       |           |          | [M-H-3glc]491.3709                                                                        |                                                                   |       |            |
|     |        |                                                 |       |           |          | [M-H]785.47                                                                               |                                                                   |       |            |
| 110 | 24.463 | C <sub>39</sub> H <sub>50</sub> O <sub>20</sub> | +HCOO | 883.2849  | 2.60391  | [M-H-xyl]653.4212                                                                         | epimedin A*                                                       | EB    | flavonoids |
|     |        |                                                 |       |           |          | [M-H-xyl-glc]491.37                                                                       |                                                                   |       |            |
|     |        |                                                 |       |           |          | [M-H-glc]675.2272                                                                         |                                                                   |       |            |
|     |        |                                                 |       |           |          | [M-H-rha-2glc]367.1187                                                                    |                                                                   |       |            |
|     |        |                                                 |       |           |          | [M-H-rha-2glc]366.1102                                                                    |                                                                   |       |            |
| 111 | 24.486 | C <sub>15</sub> H <sub>12</sub> O <sub>4</sub>  | -H    | 255.0654  | 3.53     | [M-H-rha-2glc-CH <sub>3</sub> ]351.0829                                                   | liquiritigenin                                                    | GU/AB | flavonoids |
|     |        |                                                 |       |           |          | [M-H-rha-2glc-CH <sub>3</sub> -CO]323.0910                                                |                                                                   |       |            |
|     |        |                                                 |       |           |          | [M-H-C <sub>8</sub> H <sub>7</sub> O]135.0074                                             |                                                                   |       |            |
| 112 | 24.772 | C <sub>38</sub> H <sub>48</sub> O <sub>19</sub> | +HCOO | 853.2766  | 0.117195 | [M-H-C <sub>7</sub> H <sub>3</sub> O <sub>3</sub> ]119.0489                               | epimedin B*                                                       | EB    | flavonoids |
|     |        |                                                 |       |           |          | [M-H-C <sub>7</sub> H <sub>3</sub> O <sub>3</sub> -C <sub>2</sub> H <sub>4</sub> ]91.0177 |                                                                   |       |            |
|     |        |                                                 |       |           |          | [M-H-glc]645.2178                                                                         |                                                                   |       |            |
|     |        |                                                 |       |           |          | [M-H-glc-rha(2-1)xyl]367.1175                                                             |                                                                   |       |            |
|     |        |                                                 |       |           |          | [M-H-glc-rha(2-1)xyl-CH <sub>3</sub> ]351.0874                                            |                                                                   |       |            |
|     |        |                                                 |       |           |          | [M-H-glc-rha(2-1)xyl-CH <sub>3</sub> -CO]323.0921                                         |                                                                   |       |            |

|     |        |                                                  |       |           |          |                                                                                                                                                                                                                                                                                                                                                                                     |                                          |                 |            |
|-----|--------|--------------------------------------------------|-------|-----------|----------|-------------------------------------------------------------------------------------------------------------------------------------------------------------------------------------------------------------------------------------------------------------------------------------------------------------------------------------------------------------------------------------|------------------------------------------|-----------------|------------|
| 113 | 25.007 | C <sub>32</sub> H <sub>46</sub> O <sub>9</sub> N | +H    | 588.3171  | 0.68     | [M+H-CH <sub>3</sub> OH]556.2884<br>[M+H-CH <sub>3</sub> OH-H <sub>2</sub> O]538.2941<br>[M+H-2CH <sub>3</sub> OH]524.2614<br>[M+H-2CH <sub>3</sub> OH-H <sub>2</sub> O]506.2642                                                                                                                                                                                                    | benzoyldeoxyaconine*                     | ACD             | alkaloid   |
| 114 | 25.021 | C <sub>47</sub> H <sub>80</sub> O <sub>19</sub>  | +HCOO | 993.5247  | 2.92     | [M-H-xy]815.4747<br>[M-H-xy]653.4521                                                                                                                                                                                                                                                                                                                                                | hosenkoside L                            | IB              | saponins   |
| 115 | 25.039 | C <sub>39</sub> H <sub>50</sub> O <sub>19</sub>  | +HCOO | 867.2907  | 1.844822 | [M-H-glc]659.2330<br>[M-H-glc-2rha]367.1168<br>[M-H-glc-2rha-CH <sub>3</sub> ]351.0868<br>[M-H-glc-2rha-CH <sub>3</sub> -CO]323.0919                                                                                                                                                                                                                                                | epimedin C                               | EB              | flavonoids |
| 116 | 25.291 | C <sub>23</sub> H <sub>22</sub> O <sub>7</sub>   | -H    | 409.1291  | 0.43     | [M-H-CH <sub>2</sub> CO-H]366.1095<br>[M-H-CH <sub>2</sub> CO-H-CH <sub>3</sub> ]351.0864<br>[M-H-CH <sub>2</sub> CO-H-CH <sub>3</sub> -CO]323.0908                                                                                                                                                                                                                                 | icaritin+C <sub>2</sub> H <sub>2</sub> O | EB              | flavonoids |
| 117 | 25.438 | C <sub>15</sub> H <sub>10</sub> O <sub>7</sub>   | -H    | 301.0351  | 1.00     | [M-H- <sub>2</sub> CO-OH]228.0448<br>[M-H-C <sub>7</sub> H <sub>7</sub> O <sub>2</sub> ]178.9967<br>[M-H-C <sub>8</sub> H <sub>6</sub> O <sub>4</sub> ]151.0071<br>[M-H-C <sub>7</sub> H <sub>4</sub> O <sub>4</sub> ]149.0313<br>[M-H-C <sub>7</sub> H <sub>4</sub> O <sub>4</sub> -CO]121.0309<br>[M-H-C <sub>7</sub> H <sub>4</sub> O <sub>4</sub> -CO-CH <sub>3</sub> ]107.0144 | quercetin                                | PC/EC/<br>GU/EB | flavonoids |
| 118 | 25.562 | C <sub>33</sub> H <sub>40</sub> O <sub>15</sub>  | +HCOO | 721.2346  | -1.10921 | [M-H-rha]529.1719<br>[M-H-glc]513.1766<br>[M-H-glc-rha]367.1186<br>[M-H-glc-rha-CH <sub>3</sub> ]351.0874<br>[M-H-glc-rha-CH <sub>3</sub> -CO]323.0911                                                                                                                                                                                                                              | icariin*                                 | EB              | flavonoids |
| 119 | 25.895 | C <sub>48</sub> H <sub>82</sub> O <sub>19</sub>  | +HCOO | 1007.5425 | 0.69     | [M-H-glc]799.4684<br>[M-H-glc-H <sub>2</sub> O]781.4883<br>[M-H-2glc]638.4379<br>[M-H-3glc]475.3751                                                                                                                                                                                                                                                                                 | hosenkoside O                            | IB              | saponins   |

|     |        |                                                 |       |           |          |                                                                                                                                                                                                               |                                 |    |            |
|-----|--------|-------------------------------------------------|-------|-----------|----------|---------------------------------------------------------------------------------------------------------------------------------------------------------------------------------------------------------------|---------------------------------|----|------------|
| 120 | 25.922 | C <sub>42</sub> H <sub>72</sub> O <sub>15</sub> | +HCOO | 861.4836  |          | [M-H]815.4791<br>[M-H-glc]653.4254<br>[M-H-2glc]491.3731<br>[M-H-2glc-CH <sub>3</sub> OH]459.3431                                                                                                             | hosenkoside D                   | IB | saponins   |
| 121 | 25.935 | C <sub>23</sub> H <sub>24</sub> O <sub>12</sub> | -H    | 491.1187  | 1.63     | [M-H-glc]329.0677<br>[M-H-glc-CH <sub>3</sub> ]313.0381<br>[M-H-glc-2CH <sub>3</sub> ]299.0192<br>[M-H-glc-2CH <sub>3</sub> -CO]270.0126<br>[M-H-glc-2CH <sub>3</sub> -2CO]242.0222                           | rhamnazin-3-O-<br>β-D-glucoside | EC | flavonoids |
| 122 | 26.111 | C <sub>42</sub> H <sub>72</sub> O <sub>15</sub> | +HCOO | 861.4821  |          | [M-H]815.4787<br>[M-H-glc]653.4281<br>[M-H-2glc]491.3813<br>[M-H-2glc-CH <sub>3</sub> OH]459.3421                                                                                                             | hosenkoside I                   | IB | saponins   |
| 123 | 26.338 | C <sub>20</sub> H <sub>18</sub> O <sub>6</sub>  | +H    | 355.1171  | 1.45     | [M+H-CO]337.1062<br>[M+H-C <sub>2</sub> H <sub>4</sub> O <sub>2</sub> ] 295.0960<br>[M+H-H <sub>2</sub> O-C <sub>3</sub> H <sub>6</sub> O]279.0644<br>[C <sub>7</sub> H <sub>4</sub> O <sub>3</sub> ]137.0236 | 3''-hydroxypsoralenolc          | PC | flavonoids |
| 124 | 26.465 | C <sub>48</sub> H <sub>72</sub> O <sub>21</sub> | -H    | 983.4492  | 0.101683 | [M-H-glc]821.4113<br>[M-H-glc-GluA]645.3664<br>[2GluA-H <sub>2</sub> O]351.0621<br>[GluA-H]193.0355<br>[[2×C <sub>6</sub> H <sub>8</sub> O <sub>6</sub> -H]-COOH-H <sub>2</sub> O]113.0225                    | licoricesaponin A3              | GU | saponins   |
| 125 | 26.699 | C <sub>30</sub> H <sub>74</sub> O <sub>22</sub> | -H    | 1025.4598 | 0.097517 | [(2GluA-rha)-H]497.1153<br>[(GluA-rha)-H]339.0927<br>[(GluA-rha)-H <sub>2</sub> O-H]321.0798<br>[rha-H]163.0576<br>[xyl-H <sub>2</sub> O]113.0218                                                             | uralsaponin X                   | GU | saponins   |
| 126 | 26.757 | C <sub>34</sub> H <sub>40</sub> O <sub>15</sub> | -H    | 687.2285  | 1.37     | [M-H-rha(2-1)rha-CO]367.1180<br>[M-H-rha(2-1)rha-CH <sub>3</sub> -CO]352.0945<br>[M-H-rha(2-1)rha-CH <sub>3</sub> -CO]351.0872<br>[M-H-rha(2-1)rha-CH <sub>3</sub> -2CO]323.0924                              | icariside II -xyl(OAc)          | EB | flavonoids |

|                                                                                |        |                                                 |       |           |       |                                                                              |                                                                      |    |            |
|--------------------------------------------------------------------------------|--------|-------------------------------------------------|-------|-----------|-------|------------------------------------------------------------------------------|----------------------------------------------------------------------|----|------------|
| 127                                                                            | 26.773 | C <sub>35</sub> H <sub>40</sub> O <sub>16</sub> | +HCOO | 761.2285  | 1.87  | [M-H-furan acid]571.1806                                                     | icaritin+C <sub>2</sub> H <sub>2</sub> O+furan<br>acid+glc           | EB | flavonoids |
|                                                                                |        |                                                 |       |           |       | [M-H-furan acid-C <sub>2</sub> H <sub>2</sub> O <sub>2</sub> ]513.1747       |                                                                      |    |            |
|                                                                                |        |                                                 |       |           |       | [M-H-furan acid-glc]409.1284                                                 |                                                                      |    |            |
|                                                                                |        |                                                 |       |           |       | [M-H-furan acid-glc-C <sub>2</sub> H <sub>2</sub> O <sub>2</sub> ]367.1177   |                                                                      |    |            |
|                                                                                |        |                                                 |       |           |       | [M-H-furan acid-glc-C <sub>2</sub> H <sub>2</sub> O <sub>2</sub> -O]351.0877 |                                                                      |    |            |
| [M-H-furan acid-glc-C <sub>2</sub> H <sub>2</sub> O <sub>2</sub> -COO]323.0931 |        |                                                 |       |           |       |                                                                              |                                                                      |    |            |
| 128                                                                            | 26.791 | C <sub>50</sub> H <sub>82</sub> O <sub>22</sub> | -H    | 1033.5198 | 2.03  | [M-H-xyl]901.4734                                                            | asparagoside F                                                       | AC | saponins   |
|                                                                                |        |                                                 |       |           |       | [M-H-xyl-glc]739.4270                                                        |                                                                      |    |            |
|                                                                                |        |                                                 |       |           |       | [M-H-xyl-2glc]577.3646                                                       |                                                                      |    |            |
| 129                                                                            | 26.816 | C <sub>42</sub> H <sub>72</sub> O <sub>14</sub> | +HCOO | 845.4905  | -0.71 | [M-H-glc]637.4258                                                            | ginsenoside Rf*                                                      | PG | saponins   |
|                                                                                |        |                                                 |       |           |       | [M-H-2glc]475.3792                                                           |                                                                      |    |            |
|                                                                                |        |                                                 |       |           |       | [M-H-2glc-C <sub>6</sub> H <sub>12</sub> ]391.2812                           |                                                                      |    |            |
|                                                                                |        |                                                 |       |           |       | [2glc-H-C <sub>4</sub> H <sub>8</sub> O <sub>4</sub> ]221.0689               |                                                                      |    |            |
| 130                                                                            | 26.822 | C <sub>39</sub> H <sub>48</sub> O <sub>19</sub> | -H    | 819.2702  | 1.18  | [M-H-glc]657.219                                                             | anhydroicaritin-3-O-<br>rhamnoidide(1-2)-furan<br>acid-7-O-glucoside | EB | flavonoids |
|                                                                                |        |                                                 |       |           |       | [M-H-glc-H <sub>2</sub> O]639.2058                                           |                                                                      |    |            |
|                                                                                |        |                                                 |       |           |       | [M-H-rha-furan acid]529.1701                                                 |                                                                      |    |            |
|                                                                                |        |                                                 |       |           |       | [M-H-glc-furan acid]513.1772                                                 |                                                                      |    |            |
|                                                                                |        |                                                 |       |           |       | [M-H-rha-furan acid-glc]367.1180                                             |                                                                      |    |            |
|                                                                                |        |                                                 |       |           |       | [M-H-rha-furan acid-glc-CH <sub>2</sub> ]352.0943                            |                                                                      |    |            |
| [M-H-rha-furan acid-glc-CH <sub>3</sub> ]351.0886                              |        |                                                 |       |           |       |                                                                              |                                                                      |    |            |
| [M-H-rha-furan acid-glc-CH <sub>3</sub> -CO]323.0909                           |        |                                                 |       |           |       |                                                                              |                                                                      |    |            |
| 131                                                                            | 26.930 | C <sub>42</sub> H <sub>72</sub> O <sub>14</sub> | +HCOO | 845.4905  | -0.71 | [M-H-rha]653.4365                                                            | pseudo-ginsenoside F <sub>11</sub>                                   | PG | saponins   |
|                                                                                |        |                                                 |       |           |       | [M-H-rha-glc]491.3800                                                        |                                                                      |    |            |
| 132                                                                            | 26.955 | C <sub>11</sub> H <sub>7</sub> O <sub>3</sub>   | +H    | 187.0397  | 3.74  | [M+H-CO]159.0447                                                             | psoralen*                                                            | PC | others     |
|                                                                                |        |                                                 |       |           |       | [M+H-COO]143.0496                                                            |                                                                      |    |            |
|                                                                                |        |                                                 |       |           |       | [M+H-2CO]131.0497                                                            |                                                                      |    |            |
|                                                                                |        |                                                 |       |           |       | [M+H-CO-COO]115.0547                                                         |                                                                      |    |            |
| 133                                                                            | 26.988 | C <sub>50</sub> H <sub>82</sub> O <sub>22</sub> | -H    | 1033.5214 | 2.03  | [M-H-xyl]901.4734                                                            | asparagoside F                                                       | AC | saponins   |
|                                                                                |        |                                                 |       |           |       | [M-H-xyl-glc]739.4270                                                        |                                                                      |    |            |
|                                                                                |        |                                                 |       |           |       | [M-H-xyl-2glc]577.3646                                                       |                                                                      |    |            |

|     |        |                                                 |       |           |      |                                                                                                                                                                                                                                                                          |                              |       |            |
|-----|--------|-------------------------------------------------|-------|-----------|------|--------------------------------------------------------------------------------------------------------------------------------------------------------------------------------------------------------------------------------------------------------------------------|------------------------------|-------|------------|
| 134 | 27.129 | C <sub>51</sub> H <sub>84</sub> O <sub>22</sub> | +HCOO | 1093.5405 | 2.83 | [M-H]1047.5366<br>[M-H-rha]901.4767<br>[M-H-glc]885.4818<br>[M-H-glc-rha]739.4250<br>[M-H-glc-2rha]577.3732                                                                                                                                                              | asparasaponin I              | PG/AC | saponins   |
| 135 | 27.269 | C <sub>48</sub> H <sub>74</sub> O <sub>20</sub> | -H    | 969.4692  | 0.21 | [M-H-H <sub>2</sub> O]951.4542<br>[M-H-H <sub>2</sub> O-COO]907.4683<br>[M-H-rha]823.3719<br>[M-H-rha-GluA]647.3920<br>[(2GluA-rha)-H]497.1158<br>[(2GluA-rha)-H-H <sub>2</sub> O-]435.1133<br>[(GluA-rha)-H]339.0955<br>[(GluA-rha)-H-H <sub>2</sub> O]321.0841         | licoricesaponin J2+rha       | GU    | saponins   |
| 136 | 27.372 | C <sub>45</sub> H <sub>74</sub> O <sub>18</sub> | +HCOO | 947.4832  | 2.64 | [M-H]901.48<br>[M-glc-H]739.429<br>[M-2glc-H]577.3702                                                                                                                                                                                                                    | shatavarin IX                | AC    | saponins   |
| 137 | 27.536 | C <sub>44</sub> H <sub>64</sub> O <sub>18</sub> | -H    | 879.401   | 1.12 | [2GluA-H <sub>2</sub> O]351.0571<br>[GluA-H]193.0356<br>[GluA-COOH-H <sub>2</sub> O]113.0208                                                                                                                                                                             | licoricesaponin E2+COO<br>+O | GU    | saponins   |
| 138 | 27.663 | C <sub>20</sub> H <sub>18</sub> O <sub>6</sub>  | +H    | 355.1174  | 0.61 | [M+H-CO]337.1068<br>[M+H-C <sub>4</sub> H <sub>8</sub> O]283.0597<br>[M+H-C <sub>4</sub> H <sub>8</sub> O-CO-CO <sub>2</sub> ]211.0391<br>[M+H-C <sub>11</sub> H <sub>14</sub> O <sub>3</sub> ]161.0236<br>[M+H-C <sub>12</sub> H <sub>14</sub> O <sub>3</sub> ]149.0240 | erythrinin C                 | PC    | flavonoids |
| 139 | 27.693 | C <sub>11</sub> H <sub>7</sub> O <sub>3</sub>   | +H    | 187.0398  | 4.28 | [M+H-CO]159.0437<br>[M+H-COO]143.0493<br>[M+H-2CO]131.0497<br>[M+H-CO-COO]115.0546                                                                                                                                                                                       | isopsoralen*                 | PC    | others     |
| 140 | 27.740 | C <sub>41</sub> H <sub>70</sub> O <sub>13</sub> | +HCOO | 815.4791  | 3.50 | [M-H-xyl]637.4279<br>[M-H-xyl-glc]475.3779<br>[M-H-xyl-glc-H <sub>2</sub> O]391.2823                                                                                                                                                                                     | notoginsenoside-R2           | PG    | saponins   |



|                                                                     |        |                                                  |       |           |          |                                                                           |                      |    |          |
|---------------------------------------------------------------------|--------|--------------------------------------------------|-------|-----------|----------|---------------------------------------------------------------------------|----------------------|----|----------|
| 141                                                                 | 27.847 | C <sub>58</sub> H <sub>98</sub> O <sub>26</sub>  | -H    | 1209.6257 | 0.50     | [M-H-xyl]1077.5767                                                        | ginsenoside Ra2      | PG | saponins |
|                                                                     |        |                                                  |       |           |          | [M-H-glc]1047.5662                                                        |                      |    |          |
|                                                                     |        |                                                  |       |           |          | [M-H-xyl-ara]945.5800                                                     |                      |    |          |
|                                                                     |        |                                                  |       |           |          | [M-H-xyl-glc]915.5544                                                     |                      |    |          |
|                                                                     |        |                                                  |       |           |          | [M-H-xyl-ara-glc]783.4742                                                 |                      |    |          |
|                                                                     |        |                                                  |       |           |          | [M-H-xyl-ara-2glc]621.4344                                                |                      |    |          |
| [M-H-xyl-ara-glc]459.3873                                           |        |                                                  |       |           |          |                                                                           |                      |    |          |
| 142                                                                 | 27.992 | C <sub>59</sub> H <sub>100</sub> O <sub>27</sub> | -H    | 1239.6368 | 0.48     | [M-H-xyl]1107.6053                                                        | ginsenoside Ra3      | PG | saponins |
|                                                                     |        |                                                  |       |           |          | [M-H-glc]1077.5989                                                        |                      |    |          |
|                                                                     |        |                                                  |       |           |          | [M-H-xyl-glc]945.5400                                                     |                      |    |          |
|                                                                     |        |                                                  |       |           |          | [M-H-xyl-2glc]783.4747                                                    |                      |    |          |
|                                                                     |        |                                                  |       |           |          | [M-H-xyl-3glc]621.4548                                                    |                      |    |          |
|                                                                     |        |                                                  |       |           |          | [M-H-xyl-4glc]459.3822                                                    |                      |    |          |
|                                                                     |        |                                                  |       |           |          | [(2glc-xyl)-H]455.1296                                                    |                      |    |          |
| [(glc-xyl)-H-C <sub>4</sub> H <sub>8</sub> O <sub>4</sub> ]191.0536 |        |                                                  |       |           |          |                                                                           |                      |    |          |
| [glc-H]161.0449                                                     |        |                                                  |       |           |          |                                                                           |                      |    |          |
| 143                                                                 | 28.080 | C <sub>54</sub> H <sub>92</sub> O <sub>23</sub>  | -H    | 1107.5931 | 1.81     | [M-H-glc]945.5292                                                         | ginsenoside Rb1*     | PG | saponins |
|                                                                     |        |                                                  |       |           |          | [M-H-2glc]783.4892                                                        |                      |    |          |
|                                                                     |        |                                                  |       |           |          | [M-H-3glc]621.4330                                                        |                      |    |          |
|                                                                     |        |                                                  |       |           |          | [M-H-4glc]459.3786                                                        |                      |    |          |
|                                                                     |        |                                                  |       |           |          | [2glc-H-C <sub>4</sub> H <sub>8</sub> O <sub>4</sub> ]221.0672            |                      |    |          |
| 144                                                                 | 28.242 | C <sub>53</sub> H <sub>82</sub> O <sub>25</sub>  | -H    | 1117.5038 | 3.042486 | [M-H-C <sub>5</sub> H <sub>6</sub> O <sub>6</sub> ]955.4906               | achyranthoside D     | AB | saponins |
|                                                                     |        |                                                  |       |           |          | [M-H-C <sub>5</sub> H <sub>6</sub> O <sub>6</sub> -glc]793.4349           |                      |    |          |
|                                                                     |        |                                                  |       |           |          | [M-H-C <sub>5</sub> H <sub>6</sub> O <sub>6</sub> -2glc]613.3726          |                      |    |          |
|                                                                     |        |                                                  |       |           |          | [M-H-C <sub>5</sub> H <sub>6</sub> O <sub>6</sub> -2glc-COOH]569.3801     |                      |    |          |
|                                                                     |        |                                                  |       |           |          | [M-H-C <sub>5</sub> H <sub>6</sub> O <sub>6</sub> -2glc-COOH-xyl]455.3518 |                      |    |          |
| 145                                                                 | 28.331 | C <sub>51</sub> H <sub>82</sub> O <sub>21</sub>  | +HCOO | 1075.5321 | 0.37     | [M-H-rha]883.4733                                                         | oligofurostanoside A | AC | saponins |
|                                                                     |        |                                                  |       |           |          | [M-H-2rha]737.4191                                                        |                      |    |          |
|                                                                     |        |                                                  |       |           |          | [M-H-2rha-glc]575.3458                                                    |                      |    |          |

|     |        |                                                 |       |           |       |                                                                                                                                                                                                                                                                                                                                                 |                  |       |            |
|-----|--------|-------------------------------------------------|-------|-----------|-------|-------------------------------------------------------------------------------------------------------------------------------------------------------------------------------------------------------------------------------------------------------------------------------------------------------------------------------------------------|------------------|-------|------------|
| 146 | 28.363 | C <sub>41</sub> H <sub>70</sub> O <sub>13</sub> | +HCOO | 815.4792  | 2.38  | [M-H-ara(f)]637.4438<br>[M-H-ara(f)-glc]475.3759<br>[M-H-ara(f)-glc-C <sub>6</sub> H <sub>12</sub> ]391.2945                                                                                                                                                                                                                                    | ginsenoside F5   | PG    | saponins   |
| 147 | 28.443 | C <sub>42</sub> H <sub>72</sub> O <sub>13</sub> | +HCOO | 829.4956  | -0.84 | [M-H-rha]637.4286<br>[M-H-rha-H <sub>2</sub> O]619.4304<br>[M-H-rha-glc]475.3783<br>[M-H-rha-glc-C <sub>6</sub> H <sub>12</sub> ]391.2824                                                                                                                                                                                                       | ginsenoside Rg2* | PG    | saponins   |
| 148 | 28.566 | C <sub>15</sub> H <sub>10</sub> O <sub>6</sub>  | +H    | 287.0541  | 0.00  | [M-H-CO]257.0426<br>[M-H-CO-H <sub>2</sub> O]239.0350<br>[M-H-2CO]229.0476<br>[M-H-2CO-H <sub>2</sub> O]211.0392<br>[M-H-3CO-H <sub>2</sub> O]183.0404                                                                                                                                                                                          | kaempferol*      | EU/EC | flavonoids |
| 149 | 28.634 | C <sub>53</sub> H <sub>90</sub> O <sub>22</sub> | +HCOO | 1123.5898 | 0.27  | [M-H-ara(f)]945.5590<br>[M-H-glc]915.5355<br>[M-H-ara-glc]783.4892<br>[M-H-ara-glc-H <sub>2</sub> O]765.4685<br>[M-H-ara-2glc]621.4295<br>[M-H-ara-3glc]459.3806<br>[2glc-H-C <sub>4</sub> H <sub>8</sub> O <sub>4</sub> ]221.0655<br>[(glc-ara)-H-C <sub>4</sub> H <sub>8</sub> O <sub>4</sub> ]191.0516<br>[glc-H]161.0457<br>[ara-h]131.0337 | ginsenoside Rc*  | PG    | saponins   |
| 150 | 28.635 | C <sub>58</sub> H <sub>98</sub> O <sub>26</sub> | -H    | 1209.6268 | -0.41 | [M-H-xyl]1077.5789<br>[M-H-glc]1047.5684<br>[M-H-xyl-ara]945.5458<br>[M-H-xyl-glc]915.5389<br>[M-H-xyl-ara-glc]783.4892<br>[M-H-xyl-ara-2glc]621.4308<br>[M-H-xyl-ara-glc]459.3773                                                                                                                                                              | ginsenoside Ra1  | PG    | saponins   |

|                                                                |        |                                                 |       |          |      |                                                                                                  |                                  |    |            |
|----------------------------------------------------------------|--------|-------------------------------------------------|-------|----------|------|--------------------------------------------------------------------------------------------------|----------------------------------|----|------------|
| 151                                                            | 28.659 | C <sub>48</sub> H <sub>74</sub> O <sub>19</sub> | -H    | 953.4728 | 1.89 | [M-H-H <sub>2</sub> O]935.4668                                                                   | licoricesaponin<br>C2+rha+2H     | GU | saponins   |
|                                                                |        |                                                 |       |          |      | [M-H-rha-glc-H <sub>2</sub> O-2COOH]537.3459                                                     |                                  |    |            |
|                                                                |        |                                                 |       |          |      | [(2GluA-rha)-H]497.1143                                                                          |                                  |    |            |
|                                                                |        |                                                 |       |          |      | [(GluA-rha)-H]339.0944                                                                           |                                  |    |            |
| 152                                                            | 28.702 | C <sub>36</sub> H <sub>62</sub> O <sub>9</sub>  | +HCOO | 683.4368 | 0.44 | [M-H-glc]475.3826                                                                                | ginsenoside F1                   | PG | saponins   |
|                                                                |        |                                                 |       |          |      | [M-H-glc-C <sub>6</sub> H <sub>12</sub> ]391.2880                                                |                                  |    |            |
|                                                                |        |                                                 |       |          |      | [M-H-H <sub>2</sub> O]933.4532                                                                   |                                  |    |            |
|                                                                |        |                                                 |       |          |      | [M-H-rha]805.4003                                                                                |                                  |    |            |
| 153                                                            | 28.708 | C <sub>48</sub> H <sub>72</sub> O <sub>19</sub> | -H    | 951.4602 | 1.26 | [M-H-rha-H <sub>2</sub> O-COOH]743.3967                                                          | licoricesaponin C2+rha           | GU | saponins   |
|                                                                |        |                                                 |       |          |      | [M-H-rha-glc-H <sub>2</sub> O]625.3383                                                           |                                  |    |            |
|                                                                |        |                                                 |       |          |      | [M-H-rha-glc-H <sub>2</sub> O-2COOH]535.3436                                                     |                                  |    |            |
|                                                                |        |                                                 |       |          |      | [(2GluA-rha)-H]497.1196                                                                          |                                  |    |            |
|                                                                |        |                                                 |       |          |      | [M-H-rha-glc-H <sub>2</sub> O-GluA]465.3016                                                      |                                  |    |            |
|                                                                |        |                                                 |       |          |      | [(GluA-rha)-H-H <sub>2</sub> O]321.0816                                                          |                                  |    |            |
| 154                                                            | 28.803 | C <sub>20</sub> H <sub>20</sub> O <sub>5</sub>  | +H    | 341.1382 | 0.59 | [M+H-H <sub>2</sub> O]323.1298                                                                   | brosimacutin E<br>brosimacutin D | PC | flavonoids |
|                                                                |        |                                                 |       |          |      | [M+H-H <sub>2</sub> O-C <sub>4</sub> H <sub>6</sub> ]269.0775                                    |                                  |    |            |
|                                                                |        |                                                 |       |          |      | [M+H-2H <sub>2</sub> O-C <sub>4</sub> H <sub>6</sub> ]251.0708                                   |                                  |    |            |
|                                                                |        |                                                 |       |          |      | [M+H-C <sub>8</sub> H <sub>8</sub> O]221.0788                                                    |                                  |    |            |
|                                                                |        |                                                 |       |          |      | [M+H-C <sub>8</sub> H <sub>8</sub> O-H <sub>2</sub> O]203.0695                                   |                                  |    |            |
|                                                                |        |                                                 |       |          |      | [M+H-C <sub>8</sub> H <sub>8</sub> O-H <sub>2</sub> O-C <sub>4</sub> H <sub>6</sub> ]149.0228    |                                  |    |            |
|                                                                |        |                                                 |       |          |      | [M-C <sub>11</sub> H <sub>13</sub> O <sub>3</sub> ]147.0440                                      |                                  |    |            |
|                                                                |        |                                                 |       |          |      | [M+H-C <sub>8</sub> H <sub>8</sub> O-H <sub>2</sub> O-C <sub>4</sub> H <sub>6</sub> -CO]121.0275 |                                  |    |            |
| [M-C <sub>11</sub> H <sub>13</sub> O <sub>3</sub> -CO]119.0480 |        |                                                 |       |          |      |                                                                                                  |                                  |    |            |
| 155                                                            | 28.903 | C <sub>27</sub> H <sub>30</sub> O <sub>11</sub> | -H    | 529.171  | 1.01 | [M-H-rha]383.1130                                                                                | caohuoside C                     | EB | flavonoids |
|                                                                |        |                                                 |       |          |      | [M-H-rha-C <sub>5</sub> H <sub>11</sub> ]312.0634                                                |                                  |    |            |
|                                                                |        |                                                 |       |          |      | [M-H-rha-C <sub>4</sub> H <sub>7</sub> -OCH <sub>3</sub> ]297.0402                               |                                  |    |            |
|                                                                |        |                                                 |       |          |      | [M-H-rha-C <sub>4</sub> H <sub>7</sub> -OCH <sub>3</sub> -CO]269.0449                            |                                  |    |            |

|                                                                                                  |        |                                                 |       |           |          |                                                                                               |                                  |       |            |
|--------------------------------------------------------------------------------------------------|--------|-------------------------------------------------|-------|-----------|----------|-----------------------------------------------------------------------------------------------|----------------------------------|-------|------------|
| 156                                                                                              | 28.909 | C <sub>20</sub> H <sub>20</sub> O <sub>5</sub>  | +H    | 341.1380  | 1.17     | [M+H-H <sub>2</sub> O]323.1296                                                                | brosimacutin E<br>brosimacutin D | PC    | flavonoids |
|                                                                                                  |        |                                                 |       |           |          | [M+H-H <sub>2</sub> O-C <sub>4</sub> H <sub>6</sub> ]269.0774                                 |                                  |       |            |
|                                                                                                  |        |                                                 |       |           |          | [M+H-2H <sub>2</sub> O-C <sub>4</sub> H <sub>6</sub> ]251.0706                                |                                  |       |            |
|                                                                                                  |        |                                                 |       |           |          | [M+H-C <sub>8</sub> H <sub>8</sub> O]221.0787                                                 |                                  |       |            |
|                                                                                                  |        |                                                 |       |           |          | [M+H-C <sub>8</sub> H <sub>8</sub> O-H <sub>2</sub> O]203.0694                                |                                  |       |            |
|                                                                                                  |        |                                                 |       |           |          | [M+H-C <sub>8</sub> H <sub>8</sub> O-H <sub>2</sub> O-C <sub>4</sub> H <sub>6</sub> ]149.0227 |                                  |       |            |
|                                                                                                  |        |                                                 |       |           |          | [M-C <sub>11</sub> H <sub>13</sub> O <sub>3</sub> ]147.0444                                   |                                  |       |            |
| [M+H-C <sub>8</sub> H <sub>8</sub> O-H <sub>2</sub> O-C <sub>4</sub> H <sub>6</sub> -CO]121.0270 |        |                                                 |       |           |          |                                                                                               |                                  |       |            |
| 157                                                                                              | 29.015 | C <sub>45</sub> H <sub>74</sub> O <sub>17</sub> | -H    | 885.4837  | 1.81     | [M-H-rha]739.4236                                                                             | asparanin B                      | AC    | saponins   |
|                                                                                                  |        |                                                 |       |           |          | [M-H-rha-glc]577.3783                                                                         |                                  |       |            |
| 158                                                                                              | 29.069 | C <sub>16</sub> H <sub>12</sub> O <sub>7</sub>  | +H    | 317.0658  | 2.52     | [M-CH <sub>3</sub> ]300.0280                                                                  | isorhamnetin*                    | EC    | flavonoids |
|                                                                                                  |        |                                                 |       |           |          | [M-H-CH <sub>3</sub> -CO]271.0228                                                             |                                  |       |            |
|                                                                                                  |        |                                                 |       |           |          | [M-CH <sub>3</sub> -2CO-OH]227.0356                                                           |                                  |       |            |
|                                                                                                  |        |                                                 |       |           |          | [M-C <sub>8</sub> H <sub>8</sub> O <sub>3</sub> ]164.0092                                     |                                  |       |            |
|                                                                                                  |        |                                                 |       |           |          | [M-C <sub>8</sub> H <sub>8</sub> O <sub>4</sub> ]148.0135                                     |                                  |       |            |
| 159                                                                                              | 29.087 | C <sub>48</sub> H <sub>76</sub> O <sub>19</sub> | -H    | 955.4895  | 0.837266 | [M-H-glc]793.4376                                                                             | ginsenoside Ro*                  | PG/AB | saponins   |
|                                                                                                  |        |                                                 |       |           |          | [M--H-glc-COOH-H <sub>2</sub> O]731.4369                                                      |                                  |       |            |
|                                                                                                  |        |                                                 |       |           |          | [M-H-2glc]613.3748                                                                            |                                  |       |            |
|                                                                                                  |        |                                                 |       |           |          | [M-H-2glc-COOH]569.3832                                                                       |                                  |       |            |
|                                                                                                  |        |                                                 |       |           |          | [M-H-2glc-2COOH]523.3776                                                                      |                                  |       |            |
| [M-H-2glc-xyl-COOH]455.3528                                                                      |        |                                                 |       |           |          |                                                                                               |                                  |       |            |
| 160                                                                                              | 28.919 | C <sub>53</sub> H <sub>90</sub> O <sub>22</sub> | +HCOO | 1123.5906 | -0.45    | [M-H-ara(p)]945.5380                                                                          | ginsenoside Rb2*                 | PG    | saponins   |
|                                                                                                  |        |                                                 |       |           |          | [M-H-glc]915.5237                                                                             |                                  |       |            |
|                                                                                                  |        |                                                 |       |           |          | [M-H-ara(p)-glc]783.4878                                                                      |                                  |       |            |
|                                                                                                  |        |                                                 |       |           |          | [M-H-ara(p)-glc-H <sub>2</sub> O]765.4806                                                     |                                  |       |            |
|                                                                                                  |        |                                                 |       |           |          | [M-H-ara(p)-2glc]621.4304                                                                     |                                  |       |            |
|                                                                                                  |        |                                                 |       |           |          | [M-H-ara(p)-3glc]459.3796                                                                     |                                  |       |            |
|                                                                                                  |        |                                                 |       |           |          | [M-H-ara(p)-3glc-C <sub>6</sub> H <sub>12</sub> ]375.2900                                     |                                  |       |            |
| [2glc-H-C <sub>4</sub> H <sub>8</sub> O <sub>4</sub> ]221.0661                                   |        |                                                 |       |           |          |                                                                                               |                                  |       |            |
| [(glc-ara)-H-C <sub>4</sub> H <sub>8</sub> O <sub>4</sub> ]191.0554                              |        |                                                 |       |           |          |                                                                                               |                                  |       |            |

|     |        |                                                 |       |           |       |                                                                                                                                                                                                                                                                                                                                                                                                                                                       |                                        |    |            |
|-----|--------|-------------------------------------------------|-------|-----------|-------|-------------------------------------------------------------------------------------------------------------------------------------------------------------------------------------------------------------------------------------------------------------------------------------------------------------------------------------------------------------------------------------------------------------------------------------------------------|----------------------------------------|----|------------|
|     |        |                                                 |       |           |       | [glc-H]161.0457<br>[ara-H]131.0336                                                                                                                                                                                                                                                                                                                                                                                                                    |                                        |    |            |
| 161 | 29.126 | C <sub>20</sub> H <sub>18</sub> O <sub>5</sub>  | +H    | 339.1228  | -0.29 | [M+H-H <sub>2</sub> O]321.1131<br>[M+H-H <sub>2</sub> O-C <sub>3</sub> H <sub>6</sub> ]279.0653<br>[M+H-C <sub>4</sub> H <sub>8</sub> O]267.0655<br>[M+H-C <sub>4</sub> H <sub>8</sub> O-CO]239.0680<br>[M+H-C <sub>4</sub> H <sub>8</sub> O-2CO]211.0819<br>[M+H-C <sub>4</sub> H <sub>8</sub> O-3CO]183.0805<br>[M+H-C <sub>4</sub> H <sub>8</sub> O-3CO-H <sub>2</sub> O]165.0697<br>[M+H-C <sub>13</sub> H <sub>14</sub> O <sub>2</sub> ]137.0223 | psoralenol                             | PC | flavonoids |
| 162 | 29.397 | C <sub>53</sub> H <sub>90</sub> O <sub>22</sub> | +HCOO | 1123.5903 | -0.18 | [M-H-xyl]945.5320<br>[M-H-glc]915.5317<br>[M-H-xyl-glc]783.4809<br>[M-H-xyl-glc-H <sub>2</sub> O]765.4724<br>[M-H-xyl-2glc]621.4298<br>[M-H-xyl-3glc]459.3826<br>[M-H-xyl-3glc-C <sub>6</sub> H <sub>12</sub> ]375.2808                                                                                                                                                                                                                               | ginsenoside Rb3*                       | PG | saponins   |
| 163 | 29.483 | C <sub>27</sub> H <sub>30</sub> O <sub>11</sub> | -H    | 529.1711  | 0.82  | [M-H-rha]383.1134<br>[M-H-rha-CH <sub>3</sub> ]368.0912<br>[M-H-rha-C <sub>5</sub> H <sub>11</sub> ]312.0629<br>[M-H-rha-C <sub>4</sub> H <sub>7</sub> -OCH <sub>3</sub> ]297.0398<br>[M-H-rha-C <sub>4</sub> H <sub>7</sub> -OCH <sub>3</sub> -CO]269.0451                                                                                                                                                                                           | anhydroicaritin-3'-OH-7-<br>O-rhamnose | EB | flavonoids |

|     |        |                                                 |       |           |          |                                                                                                                                                                                                                                  |                        |    |            |
|-----|--------|-------------------------------------------------|-------|-----------|----------|----------------------------------------------------------------------------------------------------------------------------------------------------------------------------------------------------------------------------------|------------------------|----|------------|
| 164 | 29.607 | C <sub>42</sub> H <sub>62</sub> O <sub>17</sub> | -H    | 837.3907  | 0.835929 | [M-GluA]661.3500<br>[M-2GluA]485.3150<br>[2GluA-H <sub>2</sub> O]351.0533<br>[GluA-H]193.0348<br>[GluA-COOH-H <sub>2</sub> O]113.0236                                                                                            | licoricesaponin G2     | GU | saponins   |
| 165 | 29.616 | C <sub>16</sub> H <sub>12</sub> O <sub>6</sub>  | +H    | 301.0705  | 3.99     | [M-H-CH <sub>3</sub> ]284.0309<br>[M-H-CH <sub>3</sub> -CO]255.0284<br>[M-H-CH <sub>3</sub> -2CO]227.0367<br>[M-H-CH <sub>3</sub> -3CO]199.0380                                                                                  | kaempferide            | EC | flavonoids |
| 166 | 29.672 | C <sub>50</sub> H <sub>76</sub> O <sub>21</sub> | -H    | 1011.4771 | 3.460274 | [(2GluA-rha)-H]497.109<br>[(GluA-rha)-H]339.0973<br>[(GluA-rha)-H <sub>2</sub> O-H]321.0869<br>[xyl-H <sub>2</sub> O]113.0245                                                                                                    | licoricesaponin D3     | GU | saponins   |
| 167 | 29.793 | C <sub>42</sub> H <sub>60</sub> O <sub>16</sub> | -H    | 819.3787  | 2.684954 | [2GluA-H <sub>2</sub> O]351.0541<br>[GluA-H]193.0329<br>[GluA-COOH-H <sub>2</sub> O]113.0216                                                                                                                                     | licoricesaponin E2     | GU | saponins   |
| 168 | 29.8   | C <sub>56</sub> H <sub>94</sub> O <sub>24</sub> | +HCOO | 1195.6125 | -1.09    | [M-H-Acetyl]1107.5973<br>[M-H-Acetyl-H <sub>2</sub> O]1089.5854<br>[M-H-Acetyl-glc]945.5294<br>[M-H-Acetyl-2glc]783.4822<br>[M-H-Acetyl-2glc-H <sub>2</sub> O]765.4799<br>[M-H-Acetyl-3glc]621.4253<br>[M-H-Acetyl-4glc]459.3896 | acetyl-ginsenoside Rb1 | PG | saponins   |
| 169 | 29.859 | C <sub>48</sub> H <sub>72</sub> O <sub>20</sub> | -H    | 967.4532  | 1.240369 | [M-H-rha-gluA]645.3467<br>[2gluA-rha-H]497.1129<br>[2gluA-rha-H]339.0944                                                                                                                                                         | yunganoside L1         | GU | saponins   |

|                              |        |                                                 |       |          |          |                                                                                            |                        |    |            |
|------------------------------|--------|-------------------------------------------------|-------|----------|----------|--------------------------------------------------------------------------------------------|------------------------|----|------------|
| 170                          | 29.937 | C <sub>47</sub> H <sub>74</sub> O <sub>18</sub> | -H    | 925.4791 | 1.188572 | [M-H-glc]763.4275                                                                          | chikusetsusaponin IV   | AB | saponins   |
|                              |        |                                                 |       |          |          | [M-H-glc-COOH]719.4517                                                                     |                        |    |            |
|                              |        |                                                 |       |          |          | [M-H-glc-COOH-H <sub>2</sub> O]701.4286                                                    |                        |    |            |
|                              |        |                                                 |       |          |          | [M-H-glc-ara]629.3989                                                                      |                        |    |            |
|                              |        |                                                 |       |          |          | [M-H-glc-ara-O]613.3823                                                                    |                        |    |            |
| [M-H-glc-ara-O-COOH]570.3914 |        |                                                 |       |          |          |                                                                                            |                        |    |            |
|                              |        |                                                 |       |          |          | [M-H-glc-ara-O-COOH-xy]455.3452                                                            |                        |    |            |
| 171                          | 29.994 | C <sub>44</sub> H <sub>64</sub> O <sub>17</sub> | -H    | 863.4056 | 1.71     | [M-H-COO]819.4060                                                                          | licoricesaponin E2+COO | GU | saponins   |
|                              |        |                                                 |       |          |          | [M-H-H <sub>2</sub> O-COO]801.4058                                                         |                        |    |            |
|                              |        |                                                 |       |          |          | [M-H-GluA]687.3737                                                                         |                        |    |            |
|                              |        |                                                 |       |          |          | [2GluA-H <sub>2</sub> O]351.0571                                                           |                        |    |            |
|                              |        |                                                 |       |          |          | [GluA-H]193.0356                                                                           |                        |    |            |
|                              |        |                                                 |       |          |          | [GluA-COOH-H <sub>2</sub> O]113.0208                                                       |                        |    |            |
| 172                          | 30.257 | C <sub>36</sub> H <sub>62</sub> O <sub>9</sub>  | +HCOO | 683.4357 | 2.05     | [M-H-glc]475.3749                                                                          | ginsenoside Rh1*       | PG | saponins   |
| 173                          | 30.385 | C <sub>20</sub> H <sub>18</sub> O <sub>6</sub>  | +H    | 355.1071 | 1.45     | [M+H-C <sub>4</sub> H <sub>8</sub> ]299.0519                                               | desmethylicaritin      | EB | flavonoids |
|                              |        |                                                 |       |          |          | [M+H-C <sub>9</sub> H <sub>9</sub> O <sub>4</sub> ]173.0541                                |                        |    |            |
|                              |        |                                                 |       |          |          | [M+H-C <sub>4</sub> H <sub>8</sub> -C <sub>9</sub> H <sub>6</sub> O <sub>4</sub> ]121.0255 |                        |    |            |
| 174                          | 30.447 | C <sub>26</sub> H <sub>28</sub> O <sub>10</sub> | -H    | 499.1608 | 0.400672 | [M-rha]353.1031                                                                            | baohuoside II          | EB | flavonoids |
|                              |        |                                                 |       |          |          | [M-H-rha-H]352.0958                                                                        |                        |    |            |
| 175                          | 30.47  | C <sub>48</sub> H <sub>82</sub> O <sub>18</sub> | +HCOO | 991.5470 | 0.81     | [M-H-glc]783.4828                                                                          | ginsenoside Rd*        | PG | saponins   |
|                              |        |                                                 |       |          |          | [M-H-2glc]621.4426                                                                         |                        |    |            |
|                              |        |                                                 |       |          |          | [M-H-3glc]459.3837                                                                         |                        |    |            |
|                              |        |                                                 |       |          |          | [M-H-3glc-C <sub>6</sub> H <sub>12</sub> ]375.2908                                         |                        |    |            |
| 176                          | 30.561 | C <sub>27</sub> H <sub>30</sub> O <sub>11</sub> | -H    | 529.1699 | 3.08     | [M-H-glc]367.1185                                                                          | icaraside I            | EB | flavonoids |
|                              |        |                                                 |       |          |          | [M-H-glc-CO]339.0859                                                                       |                        |    |            |
| 177                          | 30.601 | C <sub>15</sub> H <sub>12</sub> O <sub>4</sub>  | -H    | 255.0658 | 1.96     | [M-H-C <sub>8</sub> H <sub>7</sub> O]135.0079                                              | isoliquiritigenin*     | GU | flavonoids |
|                              |        |                                                 |       |          |          | [M-H-C <sub>7</sub> H <sub>3</sub> O <sub>3</sub> ]119.0498                                |                        |    |            |
|                              |        |                                                 |       |          |          | [M-H-C <sub>8</sub> H <sub>7</sub> O]91.0174                                               |                        |    |            |
| 178                          | 30.859 | C <sub>16</sub> H <sub>12</sub> O <sub>4</sub>  | +H    | 269.0809 | -1.85    | [M-CH <sub>3</sub> ]253.0503                                                               | formonontin*           | GU | flavonoids |
|                              |        |                                                 |       |          |          | [M-CH <sub>2</sub> -CO]226.0601                                                            |                        |    |            |

|     |        |                                                 |       |           |          |                                                                                                                                                                                                                              |                                    |    |            |
|-----|--------|-------------------------------------------------|-------|-----------|----------|------------------------------------------------------------------------------------------------------------------------------------------------------------------------------------------------------------------------------|------------------------------------|----|------------|
|     |        |                                                 |       |           |          | [M-CH <sub>3</sub> -2CO]197.0575                                                                                                                                                                                             |                                    |    |            |
| 179 | 30.912 | C <sub>42</sub> H <sub>66</sub> O <sub>14</sub> | -H    | 793.4358  | 2.772743 | [M-H-glc]631.3844<br>[M-H-glc-H <sub>2</sub> O]613.3764<br>[M-H-glc-CO <sub>2</sub> -H <sub>2</sub> O]569.3856<br>[M-H-glc-GluA]455.3528                                                                                     | chikusetsusaponin IVa              | AB | saponins   |
| 180 | 31.031 | C <sub>55</sub> H <sub>92</sub> O <sub>23</sub> | +HCOO | 1165.5996 | 0.89     | [M-H-Acetyl]1077.5825<br>[M-H-Acetyl-xyl]945.5439<br>[M-H-Acetyl-glc]915.5369<br>[M-H-Acetyl-glc-xyl]783.4821<br>[M-H-Acetyl-2glc-xyl]621.4202<br>[M-H-Acetyl-3glc-xyl]459.3882                                              | ginsenoside Rs2<br>ginsenoside Rs1 | PG | saponins   |
| 181 | 31.031 | C <sub>17</sub> H <sub>12</sub> O <sub>8</sub>  | +H    | 345.0605  | 0.00     | [M+H-CH <sub>3</sub> ]330.0359<br>[M+H-CH <sub>3</sub> OH]313.032                                                                                                                                                            | 3,3',4'-trimethylelagic<br>acid    | EC | others     |
| 182 | 31.49  | C <sub>48</sub> H <sub>82</sub> O <sub>18</sub> | +HCOO | 991.5479  | -0.10    | [M-H-glc]783.5014<br>[M-H-2glc]621.4474<br>[M-H-3glc]459.4002                                                                                                                                                                | gypenoside XVII*                   | PG | saponins   |
| 183 | 31.815 | C <sub>33</sub> H <sub>40</sub> O <sub>15</sub> | -H    | 675.2294  | 0        | [M-rha(2-1)glc]367.1177<br>[M-H-rha(2-1)glc]366.1114<br>[M-H-rha(2-1)glc-CH <sub>3</sub> ]351.0876<br>[M-rha(2-1)glc-CH <sub>3</sub> ]352.0927<br>[M-H-rha(2-1)glc-CH <sub>3</sub> -CO]323.0920                              | sagittatosideA                     | EB | flavonoids |
| 184 | 31.904 | C <sub>16</sub> H <sub>12</sub> O <sub>7</sub>  | +H    | 317.0653  | 4.10     | [M-CH <sub>3</sub> ]300.0229<br>[M-H-C <sub>8</sub> H <sub>6</sub> O <sub>3</sub> ]165.0191<br>[M-H-C <sub>8</sub> H <sub>6</sub> O <sub>4</sub> ]149.0221<br>[M-H-C <sub>8</sub> H <sub>6</sub> O <sub>4</sub> -CO]121.0283 | rhamnetin                          | EC | flavonoids |
| 185 | 31.922 | C <sub>42</sub> H <sub>62</sub> O <sub>16</sub> | -H    | 821.3948  | 1.46     | [M-H-CO <sub>2</sub> -H <sub>2</sub> O]759.3976<br>[M-H-GluA]645.3641<br>[M-H-2GluA]469.3331<br>[2GluA-H-H <sub>2</sub> O]351.0569                                                                                           | glycyrrhizic acid*                 | GU | saponins   |



|     |        |                                                 |       |          |          |                                                                                                                                                                                                                       |                                            |    |            |
|-----|--------|-------------------------------------------------|-------|----------|----------|-----------------------------------------------------------------------------------------------------------------------------------------------------------------------------------------------------------------------|--------------------------------------------|----|------------|
|     |        |                                                 |       |          |          | [GluA-H]193.0353                                                                                                                                                                                                      |                                            |    |            |
|     |        |                                                 |       |          |          | [GluA-H-CO <sub>2</sub> -H <sub>2</sub> O]113.0243                                                                                                                                                                    |                                            |    |            |
| 186 | 32.351 | C <sub>47</sub> H <sub>80</sub> O <sub>17</sub> | +HCOO | 961.5348 | 2.60     | [M-H-ara]783.4910<br>[M-H-ara-glc]621.4313<br>[M-H-ara-2glc]459.3711                                                                                                                                                  | notoginsenoside Fe*                        | PG | saponins   |
| 187 | 32.499 | C <sub>27</sub> H <sub>30</sub> O <sub>11</sub> | -H    | 529.1725 | -1.82    | [M-H-glc]367.1168<br>[M-H-glc-H]366.1110<br>[M-H-glc-H-CH <sub>3</sub> ]351.0889<br>[M-H-glc-H-CH <sub>3</sub> -CO]323.0929                                                                                           | anhydroicaritin-3- <i>O</i> -<br>glucoside | EB | flavonoids |
| 188 | 32.78  | C <sub>32</sub> H <sub>38</sub> O <sub>14</sub> | -H    | 645.2167 | 3.409696 | [M-rha(2-1)xyl]367.1169<br>[M-H-rha(2-1)xyl]366.1095<br>[M-H-rha(2-1)xyl-CH <sub>3</sub> ]351.0864<br>[M-H-rha(2-1)xyl-CH <sub>3</sub> -CO]323.0908                                                                   | sagittatoside B*                           | EB | flavonoids |
| 189 | 32.945 | C <sub>33</sub> H <sub>40</sub> O <sub>14</sub> | -H    | 659.233  | 2.275366 | [M-rha(2-1)rha]367.1172<br>[M-H-rha(2-1)rha-CH <sub>3</sub> ]351.0860<br>[M-H-rha(2-1)rha-CH <sub>3</sub> -CO]323.0909                                                                                                | 2"- <i>O</i> -<br>rhamnosylkariside II     | EB | flavonoids |
| 190 | 33.134 | C <sub>47</sub> H <sub>80</sub> O <sub>17</sub> | +HCOO | 961.5375 | -0.21    | [M-H-xyl]783.4910<br>[M-H-xyl-glc]621.4313<br>[M-H-xyl-2glc]459.3711                                                                                                                                                  | ginsenoside compound O                     | PG | saponins   |
| 191 | 33.221 | C <sub>17</sub> H <sub>12</sub> O <sub>4</sub>  | +H    | 281.0801 | 2.63     | [M+H-H <sub>2</sub> O]263.0696<br>[M+H-H <sub>2</sub> O-CO]235.0738<br>[M+H-C <sub>8</sub> H <sub>9</sub> O]161.0238<br>[M+H-C <sub>8</sub> H <sub>6</sub> O-OH]147.0447<br>[C <sub>8</sub> H <sub>7</sub> O]119.0497 | 3-methylflavone-8-<br>carboxylic acid      | PC | flavone    |
| 192 | 33.525 | C <sub>42</sub> H <sub>64</sub> O <sub>16</sub> | -H    | 823.4084 | 4.614943 | [2GluA-H <sub>2</sub> O]351.0577<br>[GluA-H]193.0330<br>[GluA-COOH-H <sub>2</sub> O]113.0229                                                                                                                          | licoricesaponin J2                         | GU | saponins   |
| 193 | 33.96  | C <sub>42</sub> H <sub>70</sub> O <sub>12</sub> | +HCOO | 811.4823 | 2.59     | [M-H-rha]619.4182<br>[M-H-rha-glc]457.3578                                                                                                                                                                            | ginsenoside Rg4                            | PG | saponins   |

|                                                                |        |                                                 |       |          |          |                                                                                               |                    |    |            |
|----------------------------------------------------------------|--------|-------------------------------------------------|-------|----------|----------|-----------------------------------------------------------------------------------------------|--------------------|----|------------|
| 194                                                            | 34.121 | C <sub>20</sub> H <sub>20</sub> O <sub>4</sub>  | +H    | 325.1441 | -1.85    | [M-C <sub>4</sub> H <sub>7</sub> ]269.0819                                                    | bavachin           | PC | flavonoids |
|                                                                |        |                                                 |       |          |          | [M+H-C <sub>8</sub> H <sub>8</sub> O]205.0866                                                 |                    |    |            |
|                                                                |        |                                                 |       |          |          | [M-C <sub>8</sub> H <sub>8</sub> O-C <sub>4</sub> H <sub>7</sub> ]149.0241                    |                    |    |            |
|                                                                |        |                                                 |       |          |          | [M-C <sub>8</sub> H <sub>8</sub> O-C <sub>4</sub> H <sub>7</sub> -H <sub>2</sub> O]131.0132   |                    |    |            |
|                                                                |        |                                                 |       |          |          | [M-C <sub>8</sub> H <sub>8</sub> O-C <sub>4</sub> H <sub>7</sub> -CO]121.0284                 |                    |    |            |
| [M-C <sub>12</sub> H <sub>13</sub> O <sub>3</sub> ]119.0491    |        |                                                 |       |          |          |                                                                                               |                    |    |            |
| 195                                                            | 34.316 | C <sub>42</sub> H <sub>62</sub> O <sub>15</sub> | -H    | 805.3993 | 2.855718 | [2GluA-H <sub>2</sub> O]351.0543                                                              | licoricesaponin C2 | GU | saponins   |
|                                                                |        |                                                 |       |          |          | [GluA-H]193.0364                                                                              |                    |    |            |
|                                                                |        |                                                 |       |          |          | [GluA-COOH-H <sub>2</sub> O]113.0225                                                          |                    |    |            |
| 196                                                            | 34.423 | C <sub>42</sub> H <sub>70</sub> O <sub>12</sub> | +HCOO | 811.4839 | 0.62     | [M-H-rha]619.4196                                                                             | ginsenoside Rg6*   | PG | saponins   |
|                                                                |        |                                                 |       |          |          | [M-H-rha-glc]457.3526                                                                         |                    |    |            |
| 197                                                            | 34.635 | C <sub>20</sub> H <sub>20</sub> O <sub>5</sub>  | +H    | 341.1392 | -2.35    | [M+H-H <sub>2</sub> O]323.1286                                                                | bavachromanol      | PC | flavonoids |
|                                                                |        |                                                 |       |          |          | [M+H-H <sub>2</sub> O-C <sub>4</sub> H <sub>6</sub> ]269.0827                                 |                    |    |            |
|                                                                |        |                                                 |       |          |          | [M+H-C <sub>8</sub> H <sub>8</sub> O]221.0811                                                 |                    |    |            |
|                                                                |        |                                                 |       |          |          | [M+H-C <sub>8</sub> H <sub>8</sub> O-H <sub>2</sub> O]203.0697                                |                    |    |            |
|                                                                |        |                                                 |       |          |          | [M+H-C <sub>8</sub> H <sub>8</sub> O-H <sub>2</sub> O-C <sub>4</sub> H <sub>6</sub> ]149.0243 |                    |    |            |
| [M-C <sub>11</sub> H <sub>13</sub> O <sub>3</sub> ]147.0437    |        |                                                 |       |          |          |                                                                                               |                    |    |            |
| [M-C <sub>11</sub> H <sub>13</sub> O <sub>3</sub> -CO]119.0506 |        |                                                 |       |          |          |                                                                                               |                    |    |            |
| 198                                                            | 34.798 | C <sub>42</sub> H <sub>64</sub> O <sub>15</sub> | -H    | 807.4152 | 2.477034 | [M-H-CO <sub>2</sub> -H <sub>2</sub> O]745.4140                                               | licoricesaponin B2 | GU | saponins   |
|                                                                |        |                                                 |       |          |          | [M-H-GluA]631.3826                                                                            |                    |    |            |
|                                                                |        |                                                 |       |          |          | [M-H-2GluA]455.3484                                                                           |                    |    |            |
|                                                                |        |                                                 |       |          |          | [2GluA-H-H <sub>2</sub> O]351.0564                                                            |                    |    |            |
|                                                                |        |                                                 |       |          |          | [2GluA-H-H <sub>2</sub> O-CO <sub>2</sub> ]289.0572                                           |                    |    |            |
| [GluA-H]193.0350                                               |        |                                                 |       |          |          |                                                                                               |                    |    |            |
| [GluA-H-CO <sub>2</sub> -H <sub>2</sub> O]113.0244             |        |                                                 |       |          |          |                                                                                               |                    |    |            |
| 199                                                            | 34.836 | C <sub>27</sub> H <sub>30</sub> O <sub>10</sub> | -H    | 513.1759 | 1.364053 | [M-H-rha]367.1161                                                                             | icariside II       | EB | flavonoids |
|                                                                |        |                                                 |       |          |          | [M-H-rha-H]366.1114                                                                           |                    |    |            |
|                                                                |        |                                                 |       |          |          | [M-H-rha-CH <sub>2</sub> ]352.0934                                                            |                    |    |            |
|                                                                |        |                                                 |       |          |          | [M-H-rha-CH <sub>3</sub> ]351.0868                                                            |                    |    |            |
|                                                                |        |                                                 |       |          |          | [M-H-rha-CH <sub>3</sub> -CO]323.0917                                                         |                    |    |            |
| [M-H-rha-CH <sub>3</sub> -CO-CO <sub>2</sub> ]279.0297         |        |                                                 |       |          |          |                                                                                               |                    |    |            |

|     |        |                                                 |       |          |          |                                                                                                                                                                                                                                                                                                                       |                                                           |    |            |
|-----|--------|-------------------------------------------------|-------|----------|----------|-----------------------------------------------------------------------------------------------------------------------------------------------------------------------------------------------------------------------------------------------------------------------------------------------------------------------|-----------------------------------------------------------|----|------------|
| 200 | 34.901 | C <sub>42</sub> H <sub>72</sub> O <sub>13</sub> | +HCOO | 829.4932 | 2.17     | [M-H-glc]621.4340<br>[M-H-2glc]459.3979                                                                                                                                                                                                                                                                               | ginsenoside F2*                                           | PG | saponins   |
| 201 | 34.935 | C <sub>36</sub> H <sub>60</sub> O <sub>8</sub>  | +HCOO | 665.4261 | 0.60     | [M-H-glc]457.3620                                                                                                                                                                                                                                                                                                     | ginsenoside Rk3*                                          | PG | saponins   |
| 202 | 35.324 | C <sub>33</sub> H <sub>38</sub> O <sub>14</sub> | -H    | 657.2181 | 1.18     | [M-H-furan acid]513.1769<br>[M-H-furan acid-rha]367.1177<br>[M-H-furan acid-rha-H]366.1114<br>[M-H-furan acid-rha-CH <sub>2</sub> ]352.0934<br>[M-H-furan acid-rha-CH <sub>3</sub> ]351.0871<br>[M-H-furan acid-rha-CH <sub>3</sub> -CO]323.0913<br>[M-H-furan acid-rha-CH <sub>3</sub> -CO-CO <sub>2</sub> ]279.0289 | anhydroicaritin-3- <i>O</i> -<br>rhamnose(1-2)-furan acid | EB | flavonoids |
| 203 | 35.507 | C <sub>16</sub> H <sub>12</sub> O <sub>6</sub>  | +H    | 301.071  | 2.33     | [M-H-CH <sub>3</sub> ]284.0303<br>[M-H-CO]271.0608<br>[M-H-CH <sub>3</sub> -CO]256.0384<br>[M-OH-CO]255.0691<br>[M-H-2CO]243.0630<br>[M-H-2CO-CH <sub>3</sub> OH]211.0365<br>[M-H-C <sub>8</sub> H <sub>6</sub> O <sub>2</sub> ]165.0192<br>[M-H-C <sub>8</sub> H <sub>6</sub> O <sub>4</sub> ]133.0241               | rhamnocitrin                                              | EC | flavonoids |
| 204 | 35.52  | C <sub>36</sub> H <sub>60</sub> O <sub>8</sub>  | +HCOO | 665.4268 | -0.45    | [M-H-glc]457.3911                                                                                                                                                                                                                                                                                                     | ginsenoside Rh4*                                          | PG | saponins   |
| 205 | 35.573 | C <sub>48</sub> H <sub>76</sub> O <sub>19</sub> | -H    | 955.4519 | 0.837266 | [M-H-CO <sub>2</sub> -CH <sub>2</sub> OHCOOH]835.4471<br>[M-H-glc]793.4376<br>[M--H-glc-COOH-H <sub>2</sub> O]731.4369<br>[M-H-2glc]613.3748<br>[M-2glc-COOH]569.3832<br>[M-2glc-2COOH]523.3776<br>[M-2glc-xy1-COOH]455.3528                                                                                          | achyranthoside C                                          | AB | saponins   |
| 206 | 35.675 | C <sub>20</sub> H <sub>18</sub> O <sub>4</sub>  | +H    | 323.1284 | -1.86    | [M-C <sub>4</sub> H <sub>7</sub> ]267.0650<br>[M+H-C <sub>5</sub> H <sub>8</sub> ]255.0651<br>[M-C <sub>4</sub> H <sub>7</sub> -CO]239.0702<br>[M-C <sub>4</sub> H <sub>7</sub> -2CO]211.0754<br>[M+H-C <sub>13</sub> H <sub>14</sub> O]137.0240                                                                      | neobavaisoflavone*                                        | PC | flavonoids |

|     |        |                                                 |       |          |          |                                                                                                                                                                                                                                                                                                                                                                                                                                                                                                                                                         |                       |       |            |
|-----|--------|-------------------------------------------------|-------|----------|----------|---------------------------------------------------------------------------------------------------------------------------------------------------------------------------------------------------------------------------------------------------------------------------------------------------------------------------------------------------------------------------------------------------------------------------------------------------------------------------------------------------------------------------------------------------------|-----------------------|-------|------------|
| 207 | 35.87  | C <sub>42</sub> H <sub>66</sub> O <sub>14</sub> | -H    | 793.4358 | 2.772743 | [M-H-glc]631.3877<br>[M-H-glc-H <sub>2</sub> O]613.3784<br>[M-H-glc-CO <sub>2</sub> -H <sub>2</sub> O]569.3820<br>[M-H-glc-GluA]455.3516                                                                                                                                                                                                                                                                                                                                                                                                                | zingibroside R1       | PG/AB | saponins   |
| 208 | 35.880 | C <sub>21</sub> H <sub>20</sub> O <sub>6</sub>  | +H    | 369.1334 | -0.27    | [M-C <sub>4</sub> H <sub>7</sub> ]313.0693<br>[M-C <sub>5</sub> H <sub>10</sub> ]298.0472<br>[M-C <sub>4</sub> H <sub>7</sub> -CO]285.0757<br>[M-C <sub>5</sub> H <sub>10</sub> -CO]270.0510<br>[M-C <sub>4</sub> H <sub>7</sub> -CO-CH <sub>2</sub> O]255.0635<br>[M+H-C <sub>5</sub> H <sub>10</sub> -2CO]243.0657<br>[M-C <sub>4</sub> H <sub>7</sub> -2CO-CH <sub>2</sub> O]227.0703                                                                                                                                                                | glycycoumarin         | GU    | others     |
| 209 | 36.299 | C <sub>45</sub> H <sub>72</sub> O <sub>16</sub> | +HCOO | 913.4806 | 0.99     | [M-H]867.471<br>[M-H-rha]721.4117<br>[M-H-2rha]575.3643                                                                                                                                                                                                                                                                                                                                                                                                                                                                                                 | astragaloside I       | AC    | saponins   |
| 210 | 36.514 | C <sub>20</sub> H <sub>16</sub> O <sub>6</sub>  | +H    | 353.1026 | -1.70    | [M+H-H <sub>2</sub> O]335.0836<br>[M+H-C <sub>13</sub> H <sub>12</sub> O <sub>2</sub> ]153.0176                                                                                                                                                                                                                                                                                                                                                                                                                                                         | licoisoflavone B      | GU    | flavonoids |
| 211 | 36.796 | C <sub>42</sub> H <sub>72</sub> O <sub>13</sub> | +HCOO | 829.4946 | 0.48     | [M-H-glc]621.4327<br>[M-H-2glc]459.3844<br>[M-H-2glc-C <sub>6</sub> H <sub>12</sub> ]375.2900                                                                                                                                                                                                                                                                                                                                                                                                                                                           | 20-S-ginsenoside-Rg3* | PG    | saponins   |
| 212 | 36.831 | C <sub>20</sub> H <sub>20</sub> O <sub>4</sub>  | +H    | 325.1442 | -2.15    | [M-C <sub>4</sub> H <sub>7</sub> ]269.0803<br>[M+H-C <sub>8</sub> H <sub>8</sub> O]205.0858<br>[M-C <sub>8</sub> H <sub>8</sub> O-C <sub>4</sub> H <sub>7</sub> ]149.0237<br>[M-C <sub>11</sub> H <sub>13</sub> O <sub>2</sub> ]147.0445<br>[M-C <sub>8</sub> H <sub>8</sub> O-C <sub>4</sub> H <sub>7</sub> -CO]121.0286<br>[M-C <sub>12</sub> H <sub>13</sub> O <sub>3</sub> ]119.0495<br>[M-C <sub>8</sub> H <sub>8</sub> O-C <sub>4</sub> H <sub>7</sub> - <sub>2</sub> CO]93.0342<br>[M-C <sub>12</sub> H <sub>13</sub> O <sub>3</sub> -CO]91.0551 | bavachalcone          | PC    | flavonoids |
| 213 | 37.164 | C <sub>42</sub> H <sub>72</sub> O <sub>13</sub> | +HCOO | 829.4946 | 0.48     | [M-H-glc]621.4357<br>[M-H-2glc]459.3919<br>[M-H-2glc-C <sub>6</sub> H <sub>12</sub> ]375.2813                                                                                                                                                                                                                                                                                                                                                                                                                                                           | 20-R-ginsenoside-Rg3* | PG    | saponins   |

|     |        |                                                   |       |          |       |                                                                                                                                                                                                                                                                                                                                                                                                                                                                                                                |                                                               |                |            |
|-----|--------|---------------------------------------------------|-------|----------|-------|----------------------------------------------------------------------------------------------------------------------------------------------------------------------------------------------------------------------------------------------------------------------------------------------------------------------------------------------------------------------------------------------------------------------------------------------------------------------------------------------------------------|---------------------------------------------------------------|----------------|------------|
| 214 | 38.174 | C <sub>22</sub> H <sub>22</sub> O <sub>6</sub>    | +H    | 383.1489 | 0.04  | [M+H-C <sub>4</sub> H <sub>8</sub> ]327.0865<br>[M+H-C <sub>4</sub> H <sub>8</sub> -CO]299.0914<br>[M+H-C <sub>4</sub> H <sub>8</sub> -CO-CH <sub>3</sub> ]284.0675<br>[M+H-C <sub>4</sub> H <sub>8</sub> -CH <sub>2</sub> O]269.0448                                                                                                                                                                                                                                                                          | glycyrin                                                      | GU             | others     |
| 215 | 38.518 | C <sub>41</sub> H <sub>70</sub> O <sub>12</sub>   | +HCOO | 799.4818 | 3.25  | [M-H-ara]621.4313<br>[M-H-ara-glc]459.3876<br>[M-H-ara-glc-C <sub>6</sub> H <sub>12</sub> ]375.2968                                                                                                                                                                                                                                                                                                                                                                                                            | ginsenoside Mc                                                | PG             | saponins   |
| 216 | 38.541 | C <sub>22</sub> H <sub>46</sub> NO <sub>7</sub> P | +H    | 468.3085 | 1.07  | [M+H-H <sub>2</sub> O]450.2977<br>[P-Ch]184.0735<br>[P-Ch-H <sub>2</sub> O]166.0634<br>[P-Ch-C <sub>3</sub> H <sub>9</sub> N]125.0004<br>[P-Ch-HPO <sub>3</sub> ]104.1046<br>[P-Ch-HPO <sub>3</sub> -H <sub>2</sub> O]86.0995                                                                                                                                                                                                                                                                                  | 2-tetradecanoyl- <i>sn</i> -<br>glycerol<br>-3-phosphocholine | CE/HK<br>CN/QN | lyso-GPCs  |
| 217 | 38.643 | C <sub>20</sub> H <sub>16</sub> O <sub>4</sub>    | +H    | 321.1128 | -1.87 | [M-CH <sub>3</sub> ]305.0808<br>[M+H-CH <sub>3</sub> -C <sub>2</sub> H <sub>4</sub> ]279.0649<br>[M+H-CH <sub>3</sub> -C <sub>2</sub> H <sub>4</sub> -CO]251.0697<br>[M+H-CH <sub>3</sub> -C <sub>2</sub> H <sub>4</sub> - <sub>2</sub> CO]223.0754<br>[M-C <sub>6</sub> H <sub>5</sub> O <sub>2</sub> ]211.0743<br>[M-C <sub>7</sub> H <sub>5</sub> O <sub>3</sub> ]183.0807<br>[M-C <sub>7</sub> H <sub>5</sub> O <sub>3</sub> -H <sub>2</sub> O]165.0700<br>[M+H-C <sub>13</sub> H <sub>12</sub> O]137.0243 | corylin*                                                      | PC             | flavonoids |
| 218 | 39.015 | C <sub>41</sub> H <sub>70</sub> O <sub>12</sub>   | +HCOO | 799.4838 | 0.75  | [M-H-xy]621.4258<br>[M-H-xy-glc]459.3916                                                                                                                                                                                                                                                                                                                                                                                                                                                                       | ginsenoside compound Y                                        | PG             | saponins   |
| 219 | 39.167 | C <sub>20</sub> H <sub>18</sub> O <sub>4</sub>    | +H    | 323.1280 | -0.62 | [M-C <sub>8</sub> H <sub>7</sub> O]203.0705<br>[M-C <sub>9</sub> H <sub>7</sub> O <sub>2</sub> ]175.0758<br>[M-C <sub>11</sub> H <sub>11</sub> O <sub>2</sub> ]147.0443<br>[M-C <sub>12</sub> H <sub>11</sub> O <sub>3</sub> ]119.0493<br>[M-C <sub>12</sub> H <sub>11</sub> O <sub>3</sub> -CO]91.0548                                                                                                                                                                                                        | bavachromene<br>isobavachromene                               | PC             | flavonoids |

|                                                                               |                                                               |                                                   |    |          |       |                                                                               |                                                            |                |            |
|-------------------------------------------------------------------------------|---------------------------------------------------------------|---------------------------------------------------|----|----------|-------|-------------------------------------------------------------------------------|------------------------------------------------------------|----------------|------------|
| 220                                                                           | 39.608                                                        | C <sub>20</sub> H <sub>20</sub> O <sub>4</sub>    | +H | 325.1437 | -0.62 | [M-C <sub>4</sub> H <sub>7</sub> ]269.0813                                    | isobavachalcone                                            | PC             | flavonoids |
|                                                                               |                                                               |                                                   |    |          |       | [M+H-C <sub>8</sub> H <sub>8</sub> O]205.0856                                 |                                                            |                |            |
|                                                                               |                                                               |                                                   |    |          |       | [M-C <sub>8</sub> H <sub>8</sub> O-C <sub>4</sub> H <sub>7</sub> ]149.0239    |                                                            |                |            |
|                                                                               |                                                               |                                                   |    |          |       | [M-C <sub>11</sub> H <sub>13</sub> O <sub>2</sub> ]147.0442                   |                                                            |                |            |
|                                                                               |                                                               |                                                   |    |          |       | [M-C <sub>8</sub> H <sub>8</sub> O-C <sub>4</sub> H <sub>7</sub> -CO]121.0284 |                                                            |                |            |
|                                                                               |                                                               |                                                   |    |          |       | [M-C <sub>12</sub> H <sub>13</sub> O <sub>3</sub> ]119.0492                   |                                                            |                |            |
| [M-C <sub>8</sub> H <sub>8</sub> O-C <sub>4</sub> H <sub>7</sub> -2CO]93.0339 | [M-C <sub>12</sub> H <sub>13</sub> O <sub>3</sub> -CO]91.0547 |                                                   |    |          |       |                                                                               |                                                            |                |            |
| 221                                                                           | 39.919                                                        | C <sub>20</sub> H <sub>16</sub> O <sub>5</sub>    | +H | 337.1070 | 0.30  | [M+H-CO]309.1115                                                              | psoralidin*                                                | PC             | others     |
|                                                                               |                                                               |                                                   |    |          |       | [M-C <sub>4</sub> H <sub>7</sub> ]281.0444                                    |                                                            |                |            |
|                                                                               |                                                               |                                                   |    |          |       | [M-C <sub>4</sub> H <sub>7</sub> -CO]253.0496                                 |                                                            |                |            |
|                                                                               |                                                               |                                                   |    |          |       | [M-C <sub>4</sub> H <sub>7</sub> -2CO]225.0545                                |                                                            |                |            |
|                                                                               |                                                               |                                                   |    |          |       | [M+H-C <sub>4</sub> H <sub>7</sub> -2CO-OH]209.0591                           |                                                            |                |            |
|                                                                               |                                                               |                                                   |    |          |       | [M-C <sub>4</sub> H <sub>7</sub> -3CO]197.0596                                |                                                            |                |            |
| [M+H-C <sub>4</sub> H <sub>7</sub> -3CO-OH]181.0653                           | [M-C <sub>4</sub> H <sub>7</sub> -4CO]169.0648                |                                                   |    |          |       |                                                                               |                                                            |                |            |
| 222                                                                           | 39.999                                                        | C <sub>24</sub> H <sub>48</sub> NO <sub>7</sub> P | +H | 494.3240 | 0.20  | [M+H-H <sub>2</sub> O]476.3098                                                | 1-[(9Z)-hexadecenoyl]- <i>sn</i> -glycero-3-phosphocholine | CE/HK<br>CN/QN | lyso-GPCs  |
|                                                                               |                                                               |                                                   |    |          |       | [P-Ch]184.0730                                                                |                                                            |                |            |
|                                                                               |                                                               |                                                   |    |          |       | [P-Ch-H <sub>2</sub> O]166.0613                                               |                                                            |                |            |
|                                                                               |                                                               |                                                   |    |          |       | [P-Ch-C <sub>3</sub> H <sub>9</sub> N]125.0008                                |                                                            |                |            |
|                                                                               |                                                               |                                                   |    |          |       | [P-Ch-HPO <sub>3</sub> ]104.1084                                              |                                                            |                |            |
| [P-Ch-HPO <sub>3</sub> -H <sub>2</sub> O]86.0977                              |                                                               |                                                   |    |          |       |                                                                               |                                                            |                |            |
| 223                                                                           | 40.885                                                        | C <sub>23</sub> H <sub>48</sub> NO <sub>7</sub> P | +H | 482.3228 | 2.73  | [P-Ch]184.0735                                                                | 1-pentadecanoyl- <i>sn</i> -glycero-3-phosphocholine       | CE/HK<br>CN/QN | lyso-GPCs  |
|                                                                               |                                                               |                                                   |    |          |       | [P-Ch-H <sub>2</sub> O]166.0635                                               |                                                            |                |            |
|                                                                               |                                                               |                                                   |    |          |       | [P-Ch-C <sub>3</sub> H <sub>9</sub> N]125.0002                                |                                                            |                |            |
|                                                                               |                                                               |                                                   |    |          |       | [P-Ch-HPO <sub>3</sub> ]104.1054                                              |                                                            |                |            |
|                                                                               |                                                               |                                                   |    |          |       | [P-Ch-HPO <sub>3</sub> -H <sub>2</sub> O]86.0960                              |                                                            |                |            |
| 224                                                                           | 41.090                                                        | C <sub>20</sub> H <sub>18</sub> O <sub>6</sub>    | -H | 353.1027 | 0.85  | [M-CHO <sub>2</sub> ]308.1060                                                 | (-)-asarinin*                                              | XX             | others     |

|     |        |                                                   |       |          |       |                                                                                                  |                                                                  |                |            |
|-----|--------|---------------------------------------------------|-------|----------|-------|--------------------------------------------------------------------------------------------------|------------------------------------------------------------------|----------------|------------|
| 225 | 41.645 | C <sub>25</sub> H <sub>24</sub> O <sub>5</sub>    | +H    | 405.1689 | 1.86  | [M+H-C <sub>4</sub> H <sub>8</sub> -CH <sub>2</sub> O]319.0966                                   | osajin                                                           | PC             | flavonoids |
|     |        |                                                   |       |          |       | [M+H-C <sub>4</sub> H <sub>7</sub> -C <sub>4</sub> H <sub>7</sub> O]279.0651                     |                                                                  |                |            |
|     |        |                                                   |       |          |       | [M+H-C <sub>4</sub> H <sub>7</sub> -C <sub>4</sub> H <sub>7</sub> O-H <sub>2</sub> O]251.0691    |                                                                  |                |            |
|     |        |                                                   |       |          |       | [M+H-C <sub>4</sub> H <sub>7</sub> -C <sub>4</sub> H <sub>7</sub> O-H <sub>2</sub> O-CO]223.0750 |                                                                  |                |            |
| 226 | 41.714 | C <sub>42</sub> H <sub>70</sub> O <sub>12</sub>   | +HCOO | 811.4836 | 0.99  | [C <sub>7</sub> H <sub>4</sub> O <sub>3</sub> ]137.0239                                          | ginsenoside Rk1*                                                 | PG             | saponins   |
|     |        |                                                   |       |          |       | [M-H-glc]603.4244                                                                                |                                                                  |                |            |
|     |        |                                                   |       |          |       | [M-H-2glc]441.3729                                                                               |                                                                  |                |            |
|     |        |                                                   |       |          |       |                                                                                                  |                                                                  |                |            |
| 227 | 41.761 | C <sub>26</sub> H <sub>50</sub> NO <sub>7</sub> P | +H    | 520.3414 | 1.54  | [M+H-H <sub>2</sub> O]502.3297                                                                   | 1-linoleoyl- <i>sn</i> -glycerol<br>-3-phosphocholine            | CE/HK<br>CN/QN | lyso-GPCs  |
|     |        |                                                   |       |          |       | [M-P-Ch]337.2722                                                                                 |                                                                  |                |            |
|     |        |                                                   |       |          |       | [P-Ch]184.0741                                                                                   |                                                                  |                |            |
|     |        |                                                   |       |          |       | [P-Ch-H <sub>2</sub> O]166.0639                                                                  |                                                                  |                |            |
|     |        |                                                   |       |          |       | [P-Ch-C <sub>3</sub> H <sub>9</sub> N]125.0002                                                   |                                                                  |                |            |
|     |        |                                                   |       |          |       | [P-Ch-HPO <sub>3</sub> ]104.1072                                                                 |                                                                  |                |            |
| 228 | 42.251 | C <sub>42</sub> H <sub>70</sub> O <sub>12</sub>   | +HCOO | 811.4844 | 0.00  | [P-Ch-HPO <sub>3</sub> -H <sub>2</sub> O]86.0965                                                 |                                                                  |                |            |
|     |        |                                                   |       |          |       | [M-H-glc]603.4263                                                                                |                                                                  |                |            |
|     |        |                                                   |       |          |       | [M-H-2glc]441.3733                                                                               | ginsenoside Rg5                                                  | PG             | saponins   |
|     |        |                                                   |       |          |       |                                                                                                  |                                                                  |                |            |
| 229 | 42.750 | C <sub>20</sub> H <sub>20</sub> O <sub>4</sub>    | +H    | 325.1436 | -0.31 | [M-C <sub>4</sub> H <sub>7</sub> ]269.0809                                                       | isobavachin                                                      | PC             | flavonoids |
|     |        |                                                   |       |          |       | [M+H-C <sub>8</sub> H <sub>8</sub> O]205.0859                                                    |                                                                  |                |            |
|     |        |                                                   |       |          |       | [M-C <sub>8</sub> H <sub>8</sub> O-C <sub>4</sub> H <sub>7</sub> ]149.0242                       |                                                                  |                |            |
|     |        |                                                   |       |          |       | [M-C <sub>8</sub> H <sub>8</sub> O-C <sub>4</sub> H <sub>7</sub> -H <sub>2</sub> O]131.0131      |                                                                  |                |            |
|     |        |                                                   |       |          |       | [M-C <sub>8</sub> H <sub>8</sub> O-C <sub>4</sub> H <sub>7</sub> -CO]121.0288                    |                                                                  |                |            |
| 230 | 42.972 | C <sub>18</sub> H <sub>24</sub> O <sub>2</sub>    | +H    | 273.1848 | 0.38  | [M-C <sub>12</sub> H <sub>13</sub> O <sub>3</sub> ]119.0459                                      |                                                                  |                |            |
|     |        |                                                   |       |          |       | [M-C8H15]161.0951                                                                                |                                                                  |                |            |
|     |        |                                                   |       |          |       | [M+H-C11H20]121.0664                                                                             |                                                                  |                |            |
|     |        |                                                   |       |          |       | [M+H-C11H20-CH2]107.0493                                                                         | 3-hydroxybakuchiol                                               | PC             | others     |
|     |        |                                                   |       |          |       |                                                                                                  |                                                                  |                |            |
| 231 | 43.452 | C <sub>24</sub> H <sub>50</sub> NO <sub>6</sub> P | +H    | 480.3445 | 1.87  | [P-Ch]184.0741                                                                                   | 1-(1Z-hexadecenyl)- <i>sn</i> -<br>glycerol<br>-3-phosphocholine | CE/HK<br>CN/QN | lyso-GPCs  |
|     |        |                                                   |       |          |       | [P-Ch-H <sub>2</sub> O]166.0634                                                                  |                                                                  |                |            |
|     |        |                                                   |       |          |       | [P-Ch-C <sub>3</sub> H <sub>9</sub> N]125.0002                                                   |                                                                  |                |            |
|     |        |                                                   |       |          |       | [P-Ch-HPO <sub>3</sub> ]104.1071                                                                 |                                                                  |                |            |
|     |        |                                                   |       |          |       | [P-Ch-HPO <sub>3</sub> -H <sub>2</sub> O]86.0966                                                 |                                                                  |                |            |

|                                                                |        |                                                   |       |          |       |                                                                                             |                                                                  |                |            |
|----------------------------------------------------------------|--------|---------------------------------------------------|-------|----------|-------|---------------------------------------------------------------------------------------------|------------------------------------------------------------------|----------------|------------|
| 232                                                            | 43.541 | C <sub>24</sub> H <sub>50</sub> NO <sub>7</sub> P | +H    | 496.3394 | 0.81  | [M+H-H <sub>2</sub> O]478.3302                                                              | 1-hexadecanoyl- <i>sn</i> -<br>glycerol<br>-3-phosphocholine     | CE/HK<br>CN/QN | lyso-GPCs  |
|                                                                |        |                                                   |       |          |       | [M-P-Ch]313.2742                                                                            |                                                                  |                |            |
|                                                                |        |                                                   |       |          |       | [M+H-C <sub>16</sub> H <sub>30</sub> O]258.1097                                             |                                                                  |                |            |
|                                                                |        |                                                   |       |          |       | [P-Ch]184.0744                                                                              |                                                                  |                |            |
|                                                                |        |                                                   |       |          |       | [P-Ch-H <sub>2</sub> O]166.0631                                                             |                                                                  |                |            |
|                                                                |        |                                                   |       |          |       | [P-Ch-C <sub>3</sub> H <sub>9</sub> N]125.0004                                              |                                                                  |                |            |
| [P-Ch-HPO <sub>3</sub> ]104.1072                               |        |                                                   |       |          |       |                                                                                             |                                                                  |                |            |
| [P-Ch-HPO <sub>3</sub> -H <sub>2</sub> O]86.0966               |        |                                                   |       |          |       |                                                                                             |                                                                  |                |            |
| 233                                                            | 43.726 | C <sub>21</sub> H <sub>22</sub> O <sub>4</sub>    | +H    | 339.1600 | -2.65 | [M-C <sub>4</sub> H <sub>7</sub> ]283.0961                                                  | bavachinin                                                       | PC             | flavonoids |
|                                                                |        |                                                   |       |          |       | [M+H-C <sub>5</sub> H <sub>8</sub> ]271.0962                                                |                                                                  |                |            |
|                                                                |        |                                                   |       |          |       | [M-C <sub>8</sub> H <sub>7</sub> O]219.1015                                                 |                                                                  |                |            |
|                                                                |        |                                                   |       |          |       | [M-C <sub>8</sub> H <sub>7</sub> O-CH <sub>2</sub> -C <sub>4</sub> H <sub>6</sub> ]151.0396 |                                                                  |                |            |
|                                                                |        |                                                   |       |          |       | [M-C <sub>12</sub> H <sub>15</sub> O <sub>2</sub> ]147.0447                                 |                                                                  |                |            |
|                                                                |        |                                                   |       |          |       | [M-C <sub>13</sub> H <sub>15</sub> O <sub>3</sub> ]119.0496                                 |                                                                  |                |            |
| [M-C <sub>13</sub> H <sub>15</sub> O <sub>3</sub> -CO]107.0497 |        |                                                   |       |          |       |                                                                                             |                                                                  |                |            |
| 234                                                            | 43.772 | C <sub>39</sub> H <sub>64</sub> O <sub>12</sub>   | +HCOO | 769.4369 | 0.65  | [M-H]723.4327                                                                               | sarsasapogenin-3-glucose-<br>22-rhamnose                         | AC             | saponins   |
|                                                                |        |                                                   |       |          |       | [M-H-rha]577.3756                                                                           |                                                                  |                |            |
|                                                                |        |                                                   |       |          |       | [M-H-rha-glc]415.3213                                                                       |                                                                  |                |            |
|                                                                |        |                                                   |       |          |       | [glc-H]161.0454                                                                             |                                                                  |                |            |
|                                                                |        |                                                   |       |          |       | [glc-H-H <sub>2</sub> O]143.0349                                                            |                                                                  |                |            |
|                                                                |        |                                                   |       |          |       | [rha-H-H <sub>2</sub> O-CH <sub>2</sub> ]113.0261                                           |                                                                  |                |            |
| [glc-H-C <sub>2</sub> H <sub>4</sub> O <sub>2</sub> ]101.0235  |        |                                                   |       |          |       |                                                                                             |                                                                  |                |            |
| 235                                                            | 44.277 | C <sub>36</sub> H <sub>62</sub> O <sub>8</sub>    | +HCOO | 667.4417 | 1.56  | [M-H-glc]459.3910                                                                           | ginsenoside Rh2*                                                 | PG             | saponins   |
| 236                                                            | 44.686 | C <sub>24</sub> H <sub>52</sub> NO <sub>6</sub> P | +H    | 482.3617 | -1.45 | [P-Ch]184.0735                                                                              | 1- <i>O</i> -hexadecyl- <i>sn</i> -glycerol<br>-3-phosphocholine | CE/HK<br>CN/QN | lyso-GPCs  |
|                                                                |        |                                                   |       |          |       | [P-Ch-H <sub>2</sub> O]166.0635                                                             |                                                                  |                |            |
|                                                                |        |                                                   |       |          |       | [P-Ch-C <sub>3</sub> H <sub>9</sub> N]125.0002                                              |                                                                  |                |            |
|                                                                |        |                                                   |       |          |       | [P-Ch-HPO <sub>3</sub> ]104.1054                                                            |                                                                  |                |            |
|                                                                |        |                                                   |       |          |       | [P-Ch-HPO <sub>3</sub> -H <sub>2</sub> O]86.0960                                            |                                                                  |                |            |



|                                                                                                           |        |                                                   |    |          |       |                                                                                            |                                                  |                |            |
|-----------------------------------------------------------------------------------------------------------|--------|---------------------------------------------------|----|----------|-------|--------------------------------------------------------------------------------------------|--------------------------------------------------|----------------|------------|
| 237                                                                                                       | 44.910 | C <sub>25</sub> H <sub>26</sub> O <sub>4</sub>    | +H | 391.1911 | -1.79 | [M-C <sub>4</sub> H <sub>7</sub> ]335.1287                                                 | corylifol A*                                     | PC             | flavonoids |
|                                                                                                           |        |                                                   |    |          |       | [M-C <sub>4</sub> H <sub>7</sub> -CH <sub>2</sub> ]321.1134                                |                                                  |                |            |
|                                                                                                           |        |                                                   |    |          |       | [M-C <sub>4</sub> H <sub>7</sub> -CH <sub>2</sub> -C <sub>4</sub> H <sub>6</sub> ]267.0652 |                                                  |                |            |
|                                                                                                           |        |                                                   |    |          |       | [M-C <sub>9</sub> H <sub>15</sub> -CO]239.0703                                             |                                                  |                |            |
|                                                                                                           |        |                                                   |    |          |       | [M-C <sub>9</sub> H <sub>15</sub> -2CO]211.0748                                            |                                                  |                |            |
|                                                                                                           |        |                                                   |    |          |       | [M-C <sub>9</sub> H <sub>15</sub> -3CO]183.0811                                            |                                                  |                |            |
|                                                                                                           |        |                                                   |    |          |       | [M-C <sub>9</sub> H <sub>15</sub> -3CO-H <sub>2</sub> O]165.0710                           |                                                  |                |            |
| [M+H-C <sub>18</sub> H <sub>22</sub> O]137.0240                                                           |        |                                                   |    |          |       |                                                                                            |                                                  |                |            |
| [M-C <sub>9</sub> H <sub>15</sub> -C <sub>9</sub> H <sub>7</sub> O]131.0491                               |        |                                                   |    |          |       |                                                                                            |                                                  |                |            |
| 238                                                                                                       | 44.952 | C <sub>26</sub> H <sub>52</sub> NO <sub>7</sub> P | +H | 522.3561 | -1.34 | [M+H-H <sub>2</sub> O]504.3450                                                             | 1-(9Z-octadecenoyl)-sn-glycerol-3-phosphocholine | CE/HK<br>CN/QN | lyso-GPCs  |
|                                                                                                           |        |                                                   |    |          |       | [M-P-Ch]339.2892                                                                           |                                                  |                |            |
|                                                                                                           |        |                                                   |    |          |       | [P-Ch]184.0741                                                                             |                                                  |                |            |
|                                                                                                           |        |                                                   |    |          |       | [P-Ch-H <sub>2</sub> O]166.0634                                                            |                                                  |                |            |
|                                                                                                           |        |                                                   |    |          |       | [P-Ch-C <sub>3</sub> H <sub>9</sub> N]125.0002                                             |                                                  |                |            |
|                                                                                                           |        |                                                   |    |          |       | [P-Ch-HPO <sub>3</sub> ]104.1071                                                           |                                                  |                |            |
| [P-Ch-HPO <sub>3</sub> -H <sub>2</sub> O]86.0966                                                          |        |                                                   |    |          |       |                                                                                            |                                                  |                |            |
| 239                                                                                                       | 45.071 | C <sub>18</sub> H <sub>32</sub> O <sub>3</sub>    | -H | 295.2266 | 4.06  | [M-H-H <sub>2</sub> O]277.2180                                                             | 13-hode                                          | AB             | others     |
|                                                                                                           |        |                                                   |    |          |       | [M-C <sub>6</sub> H <sub>13</sub> O]195.1393                                               |                                                  |                |            |
| 240                                                                                                       | 45.611 | C <sub>20</sub> H <sub>18</sub> O <sub>4</sub>    | +H | 323.1281 | -0.93 | [M-C <sub>8</sub> H <sub>7</sub> O]203.0701                                                | bavachromene<br>isobavachromene                  | PC             | flavonoids |
|                                                                                                           |        |                                                   |    |          |       | [M-C <sub>9</sub> H <sub>7</sub> O <sub>2</sub> ]175.0767                                  |                                                  |                |            |
|                                                                                                           |        |                                                   |    |          |       | [M-C <sub>11</sub> H <sub>11</sub> O <sub>2</sub> ]147.0453                                |                                                  |                |            |
|                                                                                                           |        |                                                   |    |          |       | [M-C <sub>12</sub> H <sub>11</sub> O <sub>3</sub> ]119.0491                                |                                                  |                |            |
|                                                                                                           |        |                                                   |    |          |       | [M-C <sub>12</sub> H <sub>11</sub> O <sub>3</sub> -CO]91.0546                              |                                                  |                |            |
| 241                                                                                                       | 45.842 | C <sub>21</sub> H <sub>20</sub> O <sub>6</sub>    | +H | 369.1335 | -0.54 | [M-C <sub>4</sub> H <sub>7</sub> ]313.0710                                                 | icaritin*                                        | EB             | flavonoids |
|                                                                                                           |        |                                                   |    |          |       | [M-C <sub>4</sub> H <sub>7</sub> -CH <sub>3</sub> ]298.0446                                |                                                  |                |            |
|                                                                                                           |        |                                                   |    |          |       | [M-C <sub>4</sub> H <sub>7</sub> -CH <sub>3</sub> -CO]270.0534                             |                                                  |                |            |
|                                                                                                           |        |                                                   |    |          |       | [M+H-C <sub>4</sub> H <sub>7</sub> -CH <sub>3</sub> -2CO]243.0632                          |                                                  |                |            |
| [M-C <sub>4</sub> H <sub>7</sub> -CH <sub>3</sub> -C <sub>8</sub> H <sub>5</sub> O <sub>2</sub> ]165.0201 |        |                                                   |    |          |       |                                                                                            |                                                  |                |            |

|                                                               |        |                                                   |    |          |       |                                                                                             |                                                         |                |            |
|---------------------------------------------------------------|--------|---------------------------------------------------|----|----------|-------|---------------------------------------------------------------------------------------------|---------------------------------------------------------|----------------|------------|
| 242                                                           | 46.854 | C <sub>20</sub> H <sub>18</sub> O <sub>4</sub>    | +H | 323.1277 | 0.31  | [M-C <sub>8</sub> H <sub>7</sub> O]203.0705                                                 | chromenoflavanone                                       | PC             | flavonoids |
|                                                               |        |                                                   |    |          |       | [M-C <sub>8</sub> H <sub>7</sub> O-H <sub>20</sub> ]185.0603                                |                                                         |                |            |
|                                                               |        |                                                   |    |          |       | [M-C <sub>9</sub> H <sub>7</sub> O <sub>2</sub> ]175.0401                                   |                                                         |                |            |
|                                                               |        |                                                   |    |          |       | [M-C <sub>8</sub> H <sub>7</sub> O-C <sub>3</sub> H <sub>6</sub> ]161.0235                  |                                                         |                |            |
|                                                               |        |                                                   |    |          |       | [M+H-C <sub>4</sub> H <sub>7</sub> ]149.0239                                                |                                                         |                |            |
| [M-C <sub>11</sub> H <sub>11</sub> O <sub>2</sub> ]147.0440   |        |                                                   |    |          |       |                                                                                             |                                                         |                |            |
| 243                                                           | 48.18  | C <sub>26</sub> H <sub>54</sub> NO <sub>7</sub> P | +H | 524.3718 | -2.10 | [M+H-H <sub>2</sub> O]506.3625                                                              | 1-octadecanoyl- <i>sn</i> -<br>glycero-3-phosphocholine | CE/HK<br>CN/QN | lyso-GPCs  |
|                                                               |        |                                                   |    |          |       | [M-P-Ch]341.3047                                                                            |                                                         |                |            |
|                                                               |        |                                                   |    |          |       | [P-Ch]184.0741                                                                              |                                                         |                |            |
|                                                               |        |                                                   |    |          |       | [P-Ch-H <sub>2</sub> O]166.0634                                                             |                                                         |                |            |
|                                                               |        |                                                   |    |          |       | [P-Ch-C <sub>3</sub> H <sub>9</sub> N]125.0002                                              |                                                         |                |            |
| [P-Ch-HPO <sub>3</sub> ]104.1071                              |        |                                                   |    |          |       |                                                                                             |                                                         |                |            |
| [P-Ch-HPO <sub>3</sub> -H <sub>2</sub> O]86.0966              |        |                                                   |    |          |       |                                                                                             |                                                         |                |            |
| 244                                                           | 48.301 | C <sub>21</sub> H <sub>22</sub> O <sub>4</sub>    | +H | 339.1599 | -2.36 | [M-C <sub>4</sub> H <sub>7</sub> ]283.0959                                                  | 4'- <i>O</i> -methylbavachalcone                        | PC             | flavonoids |
|                                                               |        |                                                   |    |          |       | [M+H-C <sub>5</sub> H <sub>8</sub> ]271.0965                                                |                                                         |                |            |
|                                                               |        |                                                   |    |          |       | [M-C <sub>8</sub> H <sub>7</sub> O]219.1017                                                 |                                                         |                |            |
|                                                               |        |                                                   |    |          |       | [M-C <sub>8</sub> H <sub>7</sub> O-CH <sub>2</sub> -C <sub>4</sub> H <sub>6</sub> ]151.0390 |                                                         |                |            |
|                                                               |        |                                                   |    |          |       | [M-C <sub>12</sub> H <sub>15</sub> O <sub>2</sub> ]147.0445                                 |                                                         |                |            |
| [M-C <sub>13</sub> H <sub>15</sub> O <sub>3</sub> ]119.0499   |        |                                                   |    |          |       |                                                                                             |                                                         |                |            |
| [M-C <sub>13</sub> H <sub>15</sub> O <sub>3</sub> -CO]91.0545 |        |                                                   |    |          |       |                                                                                             |                                                         |                |            |
| 245                                                           | 49.161 | C <sub>26</sub> H <sub>54</sub> NO <sub>7</sub> P | +H | 524.3721 | -2.10 | [M+H-H <sub>2</sub> O]506.3625                                                              | 2-octadecanoyl- <i>sn</i> -<br>glycero-3-phosphocholine | CE/HK<br>CN/QN | lyso-GPCs  |
|                                                               |        |                                                   |    |          |       | [M-P-Ch]341.3047                                                                            |                                                         |                |            |
|                                                               |        |                                                   |    |          |       | [P-Ch]184.0741                                                                              |                                                         |                |            |
|                                                               |        |                                                   |    |          |       | [P-Ch-H <sub>2</sub> O]166.0634                                                             |                                                         |                |            |
|                                                               |        |                                                   |    |          |       | [P-Ch-C <sub>3</sub> H <sub>9</sub> N]125.0002                                              |                                                         |                |            |
| [P-Ch-HPO <sub>3</sub> ]104.1071                              |        |                                                   |    |          |       |                                                                                             |                                                         |                |            |
| [P-Ch-HPO <sub>3</sub> -H <sub>2</sub> O]86.0966              |        |                                                   |    |          |       |                                                                                             |                                                         |                |            |

|     |        |                                                   |       |          |          |                                                                                                                                                                                                                                                                                                                                                                                      |                                                                                         |                |            |
|-----|--------|---------------------------------------------------|-------|----------|----------|--------------------------------------------------------------------------------------------------------------------------------------------------------------------------------------------------------------------------------------------------------------------------------------------------------------------------------------------------------------------------------------|-----------------------------------------------------------------------------------------|----------------|------------|
|     |        |                                                   |       |          |          | [M-C <sub>4</sub> H <sub>7</sub> ]333.1127<br>[M+H-C <sub>5</sub> H <sub>8</sub> ]321.1116<br>[M+H-C <sub>6</sub> H <sub>8</sub> ]309.1116<br>[M-C <sub>6</sub> H <sub>11</sub> ]305.0811                                                                                                                                                                                            |                                                                                         |                |            |
| 246 | 50.105 | C <sub>25</sub> H <sub>24</sub> O <sub>4</sub>    | +H    | 389.1746 | 0.26     | [M-C <sub>6</sub> H <sub>11</sub> -CH <sub>2</sub> ]291.0653<br>[M+H-C <sub>6</sub> H <sub>11</sub> -C <sub>3</sub> H <sub>3</sub> ]267.0641<br>[M-C <sub>6</sub> H <sub>11</sub> -CH <sub>2</sub> -CO]263.0705<br>[M+H-C <sub>6</sub> H <sub>11</sub> -C <sub>3</sub> H <sub>3</sub> -CO]239.0693<br>[M-C <sub>18</sub> H <sub>20</sub> O]137.0241                                  | neocorylin                                                                              | PC             | flavonoids |
| 247 | 50.301 | C <sub>36</sub> H <sub>60</sub> O <sub>7</sub>    | +HCOO | 649.4296 | 3.079616 | [M-H-glc]441.3732                                                                                                                                                                                                                                                                                                                                                                    | ginsenoside Rk2                                                                         | PG             | saponins   |
| 248 | 50.714 | C <sub>26</sub> H <sub>56</sub> NO <sub>6</sub> P | +H    | 510.3923 | -0.78    | [M+H-H <sub>2</sub> O]492.3478<br>[M-P-Ch]327.2859<br>[P-Ch]184.0724<br>[P-Ch-H <sub>2</sub> O]166.0598<br>[P-Ch-C <sub>3</sub> H <sub>9</sub> N]125.0006<br>[P-Ch-HPO <sub>3</sub> ]104.1062<br>[P-Ch-HPO <sub>3</sub> -H <sub>2</sub> O]86.0964                                                                                                                                    | 1-heptadecanoyl- <i>sn</i> -<br>glycero<br>-3-phosphocholine                            | CE/HK<br>CN/QN | lyso-GPCs  |
| 249 | 50.975 | C <sub>36</sub> H <sub>60</sub> O <sub>7</sub>    | +HCOO | 649.4301 | 2.309712 | [M-H-glc]441.3727                                                                                                                                                                                                                                                                                                                                                                    | ginsenoside Rh3                                                                         | PG             | saponins   |
| 250 | 51.074 | C <sub>28</sub> H <sub>58</sub> NO <sub>7</sub> P | +H    | 552.4019 | 1.81     | [M+H-H <sub>2</sub> O]534.3951<br>[P-Ch]184.0722<br>[P-Ch-H <sub>2</sub> O]166.0595<br>[P-Ch-C <sub>3</sub> H <sub>9</sub> N]125.0003<br>[P-Ch-HPO <sub>3</sub> ]104.1061<br>[P-Ch-HPO <sub>3</sub> -H <sub>2</sub> O]86.0963                                                                                                                                                        | 2- <i>O</i> -acetyl-1- <i>O</i> -octadecyl-<br><i>sn</i> -glycerol<br>-3-phosphocholine | CE/HK<br>CN/QN | lyso-GPCs  |
| 251 | 52.557 | C <sub>18</sub> H <sub>24</sub> O                 | +H    | 257.1900 | 0.00     | [M-C <sub>4</sub> H <sub>7</sub> ]201.1271<br>[M-C <sub>5</sub> H <sub>9</sub> ]187.1124<br>[M-C <sub>6</sub> H <sub>11</sub> ]173.0956<br>[M-C <sub>6</sub> H <sub>11</sub> -CH <sub>2</sub> ]159.0807<br>[M-C <sub>6</sub> H <sub>11</sub> -C <sub>2</sub> H <sub>2</sub> ]145.0637<br>[M-C <sub>8</sub> H <sub>7</sub> O]137.1326<br>[M-C <sub>11</sub> H <sub>17</sub> ]107.0494 | bakuchiol*                                                                              | PC             | others     |

|     |        |                                                   |    |          |       |                                                                                  |                                                               |                |           |
|-----|--------|---------------------------------------------------|----|----------|-------|----------------------------------------------------------------------------------|---------------------------------------------------------------|----------------|-----------|
|     |        |                                                   |    |          |       | [M+H-H <sub>2</sub> O]439.3555                                                   |                                                               |                |           |
|     |        |                                                   |    |          |       | [M+H-H <sub>2</sub> O-COOH]393.3628                                              |                                                               |                |           |
|     |        |                                                   |    |          |       | [M-H <sub>2</sub> O-C <sub>15</sub> H <sub>22</sub> O <sub>2</sub> ]203.1794     |                                                               |                |           |
|     |        |                                                   |    |          |       | [C <sub>15</sub> H <sub>22</sub> O <sub>2</sub> -COOH]189.1636                   |                                                               |                |           |
| 252 | 55.862 | C <sub>30</sub> H <sub>48</sub> O <sub>3</sub>    | +H | 457.3664 | 2.62  | [C <sub>15</sub> H <sub>22</sub> O <sub>2</sub> -COOH-CH <sub>2</sub> ]175.1481  | oleanic acid*                                                 | PG             | others    |
|     |        |                                                   |    |          |       | [C <sub>15</sub> H <sub>22</sub> O <sub>2</sub> -COOH-2CH <sub>2</sub> ]161.1332 |                                                               |                |           |
|     |        |                                                   |    |          |       | [C <sub>15</sub> H <sub>22</sub> O <sub>2</sub> -COOH-3CH <sub>2</sub> ]147.1169 |                                                               |                |           |
|     |        |                                                   |    |          |       | [C <sub>15</sub> H <sub>22</sub> O <sub>2</sub> -COOH-4CH <sub>2</sub> ]133.1013 |                                                               |                |           |
|     |        |                                                   |    |          |       | [C <sub>15</sub> H <sub>22</sub> O <sub>2</sub> -COOH-5CH <sub>2</sub> ]119.0866 |                                                               |                |           |
| 253 | 58.071 | C <sub>18</sub> H <sub>32</sub> O <sub>2</sub>    | -H | 279.2324 | 1.79  | NF                                                                               | linoleic-acid                                                 | PG/EB          | others    |
|     |        |                                                   |    |          |       | [P-Ch]184.0739                                                                   |                                                               |                |           |
|     |        |                                                   |    |          |       | [P-Ch-H <sub>2</sub> O]166.0634                                                  |                                                               |                |           |
| 254 | 59.467 | C <sub>40</sub> H <sub>80</sub> NO <sub>8</sub> P | +H | 734.5698 | -0.54 | [P-Ch-C <sub>3</sub> H <sub>9</sub> N]125.0003                                   | colfosceril palmitate                                         | CE/HK<br>CN/QN | lyso-GPCs |
|     |        |                                                   |    |          |       | [P-Ch-HPO <sub>3</sub> ]104.1055                                                 |                                                               |                |           |
|     |        |                                                   |    |          |       | [P-Ch-HPO <sub>3</sub> -H <sub>2</sub> O]86.0961                                 |                                                               |                |           |
|     |        |                                                   |    |          |       | [P-Ch]184.0740                                                                   |                                                               |                |           |
|     |        |                                                   |    |          |       | [P-Ch-H <sub>2</sub> O]166.0645                                                  |                                                               |                |           |
| 255 | 59.467 | C <sub>42</sub> H <sub>82</sub> NO <sub>8</sub> P | +H | 760.5851 | 0.00  | [P-Ch-C <sub>3</sub> H <sub>9</sub> N]125.0000                                   | 1-oleoyl-2-palmitoyl- <i>sn</i> -<br>glycero-3-phosphocholine | CE/HK<br>CN/QN | lyso-GPCs |
|     |        |                                                   |    |          |       | [P-Ch-HPO <sub>3</sub> ]104.1077                                                 |                                                               |                |           |
|     |        |                                                   |    |          |       | [P-Ch-HPO <sub>3</sub> -H <sub>2</sub> O]86.0964                                 |                                                               |                |           |
| 256 | 60.653 | C <sub>16</sub> H <sub>32</sub> O <sub>2</sub>    | -H | 255.2335 | -2.35 | NF                                                                               | palmitic acid                                                 | AC             | others    |
| 257 | 61.450 | C <sub>18</sub> H <sub>34</sub> O <sub>2</sub>    | -H | 281.2491 | -1.78 | NF                                                                               | oleic acid                                                    | EB             | others    |

\*Confirmed with reference compounds

**Table. S2 Detailed distinguishing information of 30 pairs of isomers from GLJ.**

| NO | RT (min) | Formula                                         | Adduct | Observed ( $m/z$ ) | DT (ms) | Predict-CCS ( $\text{\AA}^2$ ) | Diagnostic ion ( $m/z$ ) | Identification          |
|----|----------|-------------------------------------------------|--------|--------------------|---------|--------------------------------|--------------------------|-------------------------|
| 1  | 22.54    | C <sub>42</sub> H <sub>72</sub> O <sub>14</sub> | +HCOO  | 845.4875           | 8.75    | 262.4                          | -                        | ginsenoside Rg1*        |
|    | 26.82    | C <sub>42</sub> H <sub>72</sub> O <sub>14</sub> | +HCOO  | 845.4905           | 8.75    | 262.4                          | 221.0647                 | ginsenoside Rf*         |
|    | 26.93    | C <sub>42</sub> H <sub>72</sub> O <sub>14</sub> | +HCOO  | 845.4905           | 8.25    | 260.2                          | 653.4096                 | pseudo-ginsenoside F11* |
| 2  | 22.54    | C <sub>48</sub> H <sub>82</sub> O <sub>18</sub> | +HCOO  | 991.5461           | 10.11   | 261.5                          | 391.2911                 | ginsenoside Re*         |
|    | 30.47    | C <sub>48</sub> H <sub>82</sub> O <sub>18</sub> | +HCOO  | 991.5470           | 10.57   | 287.5                          | 375.2908                 | ginsenoside Rd*         |
|    | 31.49    | C <sub>48</sub> H <sub>82</sub> O <sub>18</sub> | +HCOO  | 991.5479           | 10.33   | 286.6                          | 375.2911                 | gypenoside XVII*        |
| 3  | 28.63    | C <sub>53</sub> H <sub>90</sub> O <sub>22</sub> | +HCOO  | 1123.5898          | 11.60   | 305.2                          | -                        | ginsenoside Rc          |
|    | 28.92    | C <sub>53</sub> H <sub>90</sub> O <sub>22</sub> | +HCOO  | 1123.5906          | 12.10   | 306.7                          | -                        | ginsenoside Rb2*        |
|    | 29.40    | C <sub>53</sub> H <sub>90</sub> O <sub>22</sub> | +HCOO  | 1123.5903          | 12.30   | 306.7                          | -                        | ginsenoside Rb3*        |
| 4  | 28.36    | C <sub>41</sub> H <sub>70</sub> O <sub>13</sub> | +HCOO  | 815.4792           | 8.65    | 258.4                          | -                        | notoginsenoside-R2      |
|    | 27.74    | C <sub>41</sub> H <sub>70</sub> O <sub>13</sub> | +HCOO  | 815.4791           | 8.55    | 256.5                          | -                        | ginsenoside F5          |
| 5  | 28.64    | C <sub>58</sub> H <sub>98</sub> O <sub>26</sub> | -H     | 1209.6268          | 11.80   | 324.2                          | -                        | ginsenoside Ra2         |
|    | 27.85    | C <sub>58</sub> H <sub>98</sub> O <sub>26</sub> | -H     | 1209.6257          | 12.48   | 325.6                          | -                        | ginsenoside Ra1         |
| 6  | 28.44    | C <sub>42</sub> H <sub>72</sub> O <sub>13</sub> | +HCOO  | 829.4956           | 8.62    | 260.8                          | 391.2824                 | ginsenoside Rg2*        |
|    | 34.90    | C <sub>42</sub> H <sub>72</sub> O <sub>13</sub> | +HCOO  | 829.4932           | 8.90    | 261.5                          | 391.2814                 | ginsenoside F2*         |
|    | 36.80    | C <sub>42</sub> H <sub>72</sub> O <sub>13</sub> | +HCOO  | 829.4946           | 8.75    | 261.5                          | 375.2913                 | 20-S-ginsenoside-Rg3*   |
| 7  | 37.16    | C <sub>42</sub> H <sub>72</sub> O <sub>13</sub> | +HCOO  | 829.4946           | 8.73    | 261.5                          | 375.2905                 | 20-R-ginsenoside-Rg3*   |
|    | 28.70    | C <sub>36</sub> H <sub>62</sub> O <sub>9</sub>  | +HCOO  | 683.4368           | 7.20    | 236.6                          | -                        | ginsenoside F1          |
|    | 30.26    | C <sub>36</sub> H <sub>62</sub> O <sub>9</sub>  | +HCOO  | 683.4357           | 7.05    | 236.6                          | -                        | ginsenoside Rh1*        |
| 8  | 32.35    | C <sub>47</sub> H <sub>80</sub> O <sub>17</sub> | +HCOO  | 961.5348           | 9.95    | 280.8                          | -                        | notoginsenoside Fe*     |
|    | 33.13    | C <sub>47</sub> H <sub>80</sub> O <sub>17</sub> | +HCOO  | 961.5375           | 10.05   | 282.7                          | -                        | ginsenoside compound O  |
| 9  | 33.96    | C <sub>42</sub> H <sub>70</sub> O <sub>12</sub> | +HCOO  | 811.4823           | 8.45    | 261.4                          | 457.3526                 | ginsenoside Rg4         |
|    | 34.42    | C <sub>42</sub> H <sub>70</sub> O <sub>12</sub> | +HCOO  | 811.4839           | 8.90    | 261.9                          | 457.3578                 | ginsenoside Rg6*        |
|    | 42.25    | C <sub>42</sub> H <sub>70</sub> O <sub>12</sub> | +HCOO  | 811.4844           | 9.75    | 262.6                          | 441.3729                 | ginsenoside Rk1*        |

|    |       |                                                 |       |           |       |       |          |                        |
|----|-------|-------------------------------------------------|-------|-----------|-------|-------|----------|------------------------|
|    | 41.71 | C <sub>42</sub> H <sub>70</sub> O <sub>12</sub> | +HCOO | 811.4836  | 9.45  | 262.1 | 441.3733 | ginsenoside Rg5        |
| 10 | 34.94 | C <sub>36</sub> H <sub>60</sub> O <sub>8</sub>  | +HCOO | 665.4261  | 7.05  | 247.1 | -        | ginsenoside Rk3*       |
|    | 35.52 | C <sub>36</sub> H <sub>60</sub> O <sub>8</sub>  | +HCOO | 665.4268  | 7.35  | 247.8 | -        | ginsenoside Rh4*       |
| 11 | 39.02 | C <sub>41</sub> H <sub>70</sub> O <sub>12</sub> | +HCOO | 799.4838  | 8.60  | 255.4 | -        | ginsenoside Mc         |
|    | 38.52 | C <sub>41</sub> H <sub>70</sub> O <sub>12</sub> | +HCOO | 799.4818  | 8.75  | 257.7 | -        | ginsenoside compound Y |
| 12 | 50.30 | C <sub>36</sub> H <sub>60</sub> O <sub>7</sub>  | +HCOO | 649.4296  | 7.60  | 246.5 | -        | ginsenoside Rk2        |
|    | 50.98 | C <sub>36</sub> H <sub>60</sub> O <sub>7</sub>  | +HCOO | 649.4301  | 7.85  | 247.1 | -        | ginsenoside Rh3        |
| 13 | 29.09 | C <sub>48</sub> H <sub>76</sub> O <sub>19</sub> | -H    | 955.4895  | 10.01 | 293.1 | 793.4376 | ginsenoside Ro*        |
|    | 35.57 | C <sub>48</sub> H <sub>76</sub> O <sub>19</sub> | -H    | 955.4519  | 9.95  | 292.5 | 835.4471 | achyranthoside C       |
| 14 | 21.36 | C <sub>48</sub> H <sub>82</sub> O <sub>19</sub> | +HCOO | 1007.5411 | 10.30 | 287.5 | 391.2814 | 20-O-gluginenoside-Rf  |
|    | 25.90 | C <sub>48</sub> H <sub>82</sub> O <sub>19</sub> | +HCOO | 1007.5425 | 10.50 | 291.5 | 408.3247 | hosenkoside O          |
| 15 | 35.71 | C <sub>42</sub> H <sub>66</sub> O <sub>14</sub> | -H    | 793.4358  | 8.82  | 269.3 | -        | zingibroside R1        |
|    | 30.92 | C <sub>42</sub> H <sub>66</sub> O <sub>14</sub> | -H    | 793.4358  | 7.55  | 268.8 | -        | chikusetsusaponin IVa  |
|    | 21.97 | C <sub>42</sub> H <sub>72</sub> O <sub>15</sub> | +HCOO | 861.4841  | 8.78  | 273.9 | -        | hosenkoside J          |
|    |       |                                                 |       |           |       |       |          | hosenkoside E          |
| 16 | 23.47 | C <sub>42</sub> H <sub>72</sub> O <sub>15</sub> | +HCOO | 861.4830  | 9.40  | 273.9 | -        | hosenkoside J          |
|    |       |                                                 |       |           |       |       |          | hosenkoside E          |
|    | 20.30 | C <sub>42</sub> H <sub>72</sub> O <sub>15</sub> | +HCOO | 861.4835  | 8.25  | 268.5 | -        | hosenkoside N          |
|    | 25.92 | C <sub>42</sub> H <sub>72</sub> O <sub>15</sub> | +HCOO | 861.4836  | 8.90  | 273.9 | -        | hosenkoside D          |
|    | 26.11 | C <sub>42</sub> H <sub>72</sub> O <sub>15</sub> | +HCOO | 861.4821  | 9.35  | 273.9 | -        | hosenkoside I          |
|    | 20.35 | C <sub>48</sub> H <sub>82</sub> O <sub>20</sub> | +HCOO | 1023.5361 | 10.55 | 296.9 | -        | hosenkoside B          |
| 17 | 22.38 | C <sub>48</sub> H <sub>82</sub> O <sub>20</sub> | +HCOO | 1023.5337 | 10.13 | 292.7 | -        | hosenkoside C          |
|    | 24.16 | C <sub>48</sub> H <sub>82</sub> O <sub>20</sub> | +HCOO | 1023.5356 | 11.45 | 296.9 | -        | hosenkoside A          |
|    | 20.85 | C <sub>47</sub> H <sub>80</sub> O <sub>19</sub> | +HCOO | 993.5248  | 10.50 | 293.5 | -        | hosenkoside F          |
| 18 | 23.32 | C <sub>47</sub> H <sub>80</sub> O <sub>19</sub> | +HCOO | 993.5264  | 9.75  | 289.1 | -        | hosenkoside G          |
|    | 25.02 | C <sub>47</sub> H <sub>80</sub> O <sub>19</sub> | +HCOO | 993.5247  | 11.00 | 293.5 | -        | hosenkoside L          |
|    | 28.90 | C <sub>27</sub> H <sub>30</sub> O <sub>11</sub> | -H    | 529.1710  | 4.67  | 230.3 | 383.1130 | cahuoside C            |
| 19 | 29.48 | C <sub>27</sub> H <sub>30</sub> O <sub>11</sub> | -H    | 529.1711  | 4.70  | 230.3 | 383.1134 | anhydroicaritin-3'-OH  |
|    |       |                                                 |       |           |       |       | 368.0912 | -7-O-rhamnose          |

|    |       |                                                 |       |          |      |       |          |                                           |
|----|-------|-------------------------------------------------|-------|----------|------|-------|----------|-------------------------------------------|
|    | 30.56 | C <sub>27</sub> H <sub>30</sub> O <sub>11</sub> | -H    | 529.1699 | 4.80 | 231.2 | 367.1185 | icariside I                               |
|    | 32.50 | C <sub>27</sub> H <sub>30</sub> O <sub>11</sub> | -H    | 529.1725 | 5.05 | 231.2 | 366.1110 | anhydroicaritin-3- <i>O</i><br>-glucoside |
| 20 | 25.56 | C <sub>33</sub> H <sub>40</sub> O <sub>15</sub> | +HCOO | 721.2346 | 5.40 | 246.3 | 367.1186 | icariin*                                  |
|    | 31.82 | C <sub>33</sub> H <sub>40</sub> O <sub>15</sub> | -H    | 675.2294 | 5.40 | 246.3 | 366.1114 | sagittatoside A                           |
| 21 | 18.60 | C <sub>21</sub> H <sub>22</sub> O <sub>9</sub>  | -H    | 417.1188 | 2.77 | 197.5 | -        | liquiritin*                               |
|    | 22.88 | C <sub>21</sub> H <sub>22</sub> O <sub>9</sub>  | -H    | 417.1194 | 4.10 | 201.2 | -        | isoliquiritin*                            |
| 22 | 16.38 | C <sub>27</sub> H <sub>32</sub> O <sub>14</sub> | -H    | 579.1717 | 4.38 | 226.9 | -        | glucoliquiritin                           |
|    | 17.58 | C <sub>27</sub> H <sub>32</sub> O <sub>14</sub> | -H    | 579.1714 | 4.55 | 231.8 | -        | glucoisoliquiritin                        |
| 23 | 18.50 | C <sub>26</sub> H <sub>30</sub> O <sub>13</sub> | -H    | 549.1595 | 4.45 | 230.6 | -        | liquiritin apioside*                      |
|    | 22.26 | C <sub>26</sub> H <sub>30</sub> O <sub>13</sub> | -H    | 549.1595 | 4.05 | 225.6 | -        | licuraside                                |
| 24 | 27.66 | C <sub>20</sub> H <sub>18</sub> O <sub>6</sub>  | +H    | 355.1174 | 2.90 | 186.0 | 149.0240 | erythrinin C                              |
|    | 30.39 | C <sub>20</sub> H <sub>18</sub> O <sub>6</sub>  | +H    | 355.1071 | 2.77 | 184.6 | 121.0255 | desmethylicaritin                         |
| 25 | 24.49 | C <sub>15</sub> H <sub>12</sub> O <sub>4</sub>  | -H    | 255.0654 | 1.71 | 155.0 | -        | liquiritigenin*                           |
|    | 30.60 | C <sub>15</sub> H <sub>12</sub> O <sub>4</sub>  | -H    | 255.0658 | 1.78 | 157.5 | -        | isoliquiritigenin*                        |
|    | 34.12 | C <sub>20</sub> H <sub>20</sub> O <sub>4</sub>  | +H    | 325.1441 | 2.65 | 176.3 | -        | bavachin                                  |
| 26 | 36.83 | C <sub>20</sub> H <sub>20</sub> O <sub>4</sub>  | +H    | 325.1442 | 2.75 | 178.7 | -        | bavachalcone                              |
|    | 39.61 | C <sub>20</sub> H <sub>20</sub> O <sub>4</sub>  | +H    | 325.1437 | 2.76 | 178.7 | -        | isobavachalcone                           |
|    | 42.75 | C <sub>20</sub> H <sub>20</sub> O <sub>4</sub>  | +H    | 325.1436 | 2.68 | 176.3 | -        | isobavachin                               |
|    | 35.68 | C <sub>20</sub> H <sub>18</sub> O <sub>4</sub>  | +H    | 323.1284 | 2.65 | 175.0 | 267.0649 | neobavaisoflavone*                        |
|    | 45.61 | C <sub>20</sub> H <sub>18</sub> O <sub>4</sub>  | +H    | 323.1281 | 2.63 | 174.9 | 175.0758 | bavachromene                              |
| 27 |       |                                                 |       |          |      |       | 147.0443 | isobavachromene                           |
|    | 46.85 | C <sub>20</sub> H <sub>18</sub> O <sub>4</sub>  | +H    | 323.1277 | 2.61 | 174.3 | 203.0701 | chromenoflavanone                         |
|    | 39.17 | C <sub>20</sub> H <sub>18</sub> O <sub>4</sub>  | +H    | 323.1280 | 2.63 | 174.9 | 175.0767 | bavachromene                              |
|    |       |                                                 |       |          |      |       | 147.0453 | isobavachromene                           |
| 28 | 48.30 | C <sub>21</sub> H <sub>22</sub> O <sub>4</sub>  | +H    | 339.1599 | 2.93 | 179.9 | -        | bavachinin                                |
|    | 43.73 | C <sub>21</sub> H <sub>22</sub> O <sub>4</sub>  | +H    | 339.1600 | 2.95 | 185.5 | -        | 4'- <i>O</i> -methylbavachalcone          |
| 29 | 35.51 | C <sub>16</sub> H <sub>12</sub> O <sub>6</sub>  | +H    | 301.0710 | 2.05 | 164.5 | 255.0284 | rhamnocitrin                              |
|    | 29.62 | C <sub>16</sub> H <sub>12</sub> O <sub>6</sub>  | +H    | 301.0705 | 2.03 | 164.5 | 255.0691 | kaempferide                               |

|    |       |                                                |    |          |      |       |   |               |
|----|-------|------------------------------------------------|----|----------|------|-------|---|---------------|
| 30 | 29.07 | C <sub>16</sub> H <sub>12</sub> O <sub>7</sub> | +H | 317.0658 | 2.15 | 168.3 | - | isorhamnetin* |
|    | 31.90 | C <sub>16</sub> H <sub>12</sub> O <sub>7</sub> | +H | 317.0653 | 2.15 | 168.3 | - | rhamnetin     |

---

\* Confirmed with reference compounds
